# Supplementary material for: Mastering the potential of well-defined ML1L2 species in asymmetric catalysis through ligand immobilization (MLhetLhom). Use in highly enantioselective Pd-catalyzed spiroannulation
Source: Royal Society of Chemistry journal article supplement (doi:10.1039/d6sc01392a), 2026-05-12
Supplement: d6sc01392a1.pdf [file d6sc01392a1.pdf]

## Supporting Information

# Mastering the Potential of Well-defined $ML^1L^2$ Species in Asymmetric Catalysis through Ligand Immobilization ( $ML^{het}L^{hom}$ ). Use in Highly Enantioselective Pd-catalyzed Spiroannulation

Maria Biosca,<sup>a,‡</sup> Pol de la Cruz-Sánchez,<sup>a,‡</sup> Jorge Faiges,<sup>a,‡</sup> Aitor Maestro,<sup>b,c</sup> C. Oliver Kappe,<sup>b,c</sup> Sándor B. Ötvös,<sup>b,c,\*</sup> Miquel A. Pericàs,<sup>a</sup> Oscar Pàmies,<sup>a</sup> Montserrat Diéguez<sup>a,\*</sup>

<sup>a</sup> Universitat Rovira i Virgili. Departament de Química Física i Inorgànica, C/ Marcel·lí Domingo, 1. 43007 Tarragona. Spain.

<sup>b</sup> Institute of Chemistry, University of Graz, NAWI Graz, A-8010 Graz, Austria.

<sup>c</sup> Center for Continuous Flow Synthesis and Processing (CC FLOW), Research Center Pharmaceutical Engineering GmbH (RCPE), A-8010 Graz, Austria.

<sup>‡</sup> These authors contributed equally, and they are arranged alphabetically.

## Contents

|                                                                                                                                                                                  |     |
|----------------------------------------------------------------------------------------------------------------------------------------------------------------------------------|-----|
| SI-1. General considerations                                                                                                                                                     | S3  |
| SI-2. Typical batch procedure for the asymmetric cycloaddition of 5-alkylenedene Meldrum's acid derivatives with vinyl epoxides                                                  | S3  |
| SI-3. Ligand screening and optimization of the reaction conditions                                                                                                               | S4  |
| SI-4. Relative stereochemistry elucidation of <b>3aa</b> and <b>3'aa</b>                                                                                                         | S5  |
| SI-5. Synthesis of polystyrene immobilized ligand PS-( <i>R</i> )- <b>L</b> <sub>5</sub>                                                                                         | S7  |
| SI-6. Typical batch procedure using well-defined PdL <sup>het</sup> L <sup>hom</sup> species for the enantioselective cycloaddition of 5-alkylenedene Meldrum's acid derivatives | S10 |
| SI-7. Typical flow procedure for the enantioselective cycloaddition of 5-alkylenedene Meldrum's acid derivatives with vinyl epoxides                                             | S11 |
| SI-8. Detailed results of the continuous flow Pd-cycloadditions using well-defined mixed Pd species containing PS-( <i>R</i> )- <b>L</b> <sub>5</sub> and <b>L</b> <sub>11</sub> | S12 |
| SI-9. Post-spiroannulation experiments. Preparation of rare lactone motifs                                                                                                       | S13 |
| SI-10. Application of well-defined PdL <sup>het</sup> L <sup>hom</sup> species in the enantioselective allylic alkylation                                                        | S15 |
| SI-11. Synthesis and characterization details of new alkylenedene Meldrum's acid <b>11</b> and vinyl epoxides <b>2f</b> , <b>2i</b> and <b>2j</b>                                | S16 |
| SI-12. Isolation and characterization details of tetrahydrofuran-fused spirocyclic Meldrum's acid derivatives <b>3</b>                                                           | S18 |

## Supporting Information

|                                                                                                                                      |      |
|--------------------------------------------------------------------------------------------------------------------------------------|------|
| SI-13. Synthesis and characterization details of new achiral phosphoramidite ligands <b>L<sub>10</sub></b> and <b>L<sub>11</sub></b> | S28  |
| SI-14. Synthesis of post-spiroannulation products                                                                                    | S30  |
| SI-15. Copies of NMR spectra of new alkylidene Meldrum's acid <b>11</b> and vinyl epoxides <b>2f</b> , <b>2i</b> and <b>2j</b>       | S34  |
| SI-16. Copies of NMR spectra and HPLC traces of [3+2]-cycloaddition products <b>3</b>                                                | S38  |
| SI-17. Copies of NMR spectra of the Pd-intermediates formed under catalytic conditions                                               | S86  |
| SI-18. Copies of NMR spectra of PS-( <i>R</i> )- <b>L<sub>5</sub></b> and its synthetic intermediates                                | S88  |
| SI-19. Copies of NMR spectra of ligands <b>L<sub>10</sub></b> and <b>L<sub>11</sub></b>                                              | S93  |
| SI-20. Sol-gel <sup>31</sup> P{ <sup>1</sup> H} NMR of Pd(PS-( <i>R</i> )- <b>L<sub>5</sub></b> ) <b>L<sub>11</sub></b> species      | S96  |
| SI-21. Copies of NMR spectra and HPLC traces of post-functionalized products                                                         | S97  |
| SI-22. Characterization details and copies of NMR spectra and HPLC traces of allylic alkylation product                              | S108 |
| SI-23. Kinetic data and reaction order of the catalyst                                                                               | S110 |
| SI-24. References                                                                                                                    | S117 |

## Supporting Information

### SI.1. General considerations

All reactions were carried out using standard Schlenk techniques under an atmosphere of argon. Solvents were purified and dried by standard procedures. Pd<sub>2</sub>(dba)<sub>3</sub>·CHCl<sub>3</sub> was recrystallized in chloroform twice prior to use.<sup>1</sup> Phosphoramidites L<sub>4</sub><sup>2</sup> and L<sub>5</sub><sup>3</sup>; alkylidene Meldrum's acid derivatives **1a**,<sup>4</sup> **1b**,<sup>5</sup> **1c**,<sup>6</sup> **1d–e**,<sup>5</sup> **1f**,<sup>7</sup> **1g–h**,<sup>8</sup> **1i**,<sup>9</sup> **1j**,<sup>5</sup> and **1k**<sup>10</sup>; and vinyl epoxides **2a**,<sup>11</sup> **2b**,<sup>12</sup> **2c–e**,<sup>11</sup> **2g–h**,<sup>12</sup> were prepared as previously reported in the literature. <sup>1</sup>H and <sup>13</sup>C{<sup>1</sup>H}, were recorded using a 400 MHz spectrometer. Chemical shifts are relative to that of NMR solvent for <sup>1</sup>H and <sup>13</sup>C{<sup>1</sup>H} and of H<sub>3</sub>PO<sub>4</sub> as internal standard for <sup>31</sup>P{<sup>1</sup>H}. <sup>1</sup>H and <sup>13</sup>C assignments were made based on <sup>1</sup>H-<sup>1</sup>H gCOSY and <sup>1</sup>H-<sup>13</sup>C gHSQC.

### SI.2. Typical batch procedure for the asymmetric cycloaddition of 5-alkylidene Meldrum's acid derivatives with vinyl epoxides

A flame dried Schlenk was charged with Pd<sub>2</sub>(dba)<sub>3</sub>·CHCl<sub>3</sub> (6.5 mg, 0.006 mmol), L<sub>5</sub> (12.8 mg, 0.025 mmol), 5-alkylidene Meldrum's acid derivative (0.25 mmol) and vinyl epoxide (0.5 mmol). The reaction tube was sealed with rubber-septum, then purged with vacuum-argon cycles five times. Then, anhydrous THF (1 mL) was added sequentially via syringe. The resulting mixture was stirred at room temperature overnight. After that, the solvent was evaporated in vacuo. The enantiomeric excess was determined by chiral HPLC, conversions were determined by <sup>1</sup>H NMR and isolated yields were determined after column chromatography.

## Supporting Information

### SI-3. Ligand screening and optimization of the reaction conditions

Table S1. Pd-catalyzed [3+2] cycloaddition of **1a** and **2a**.

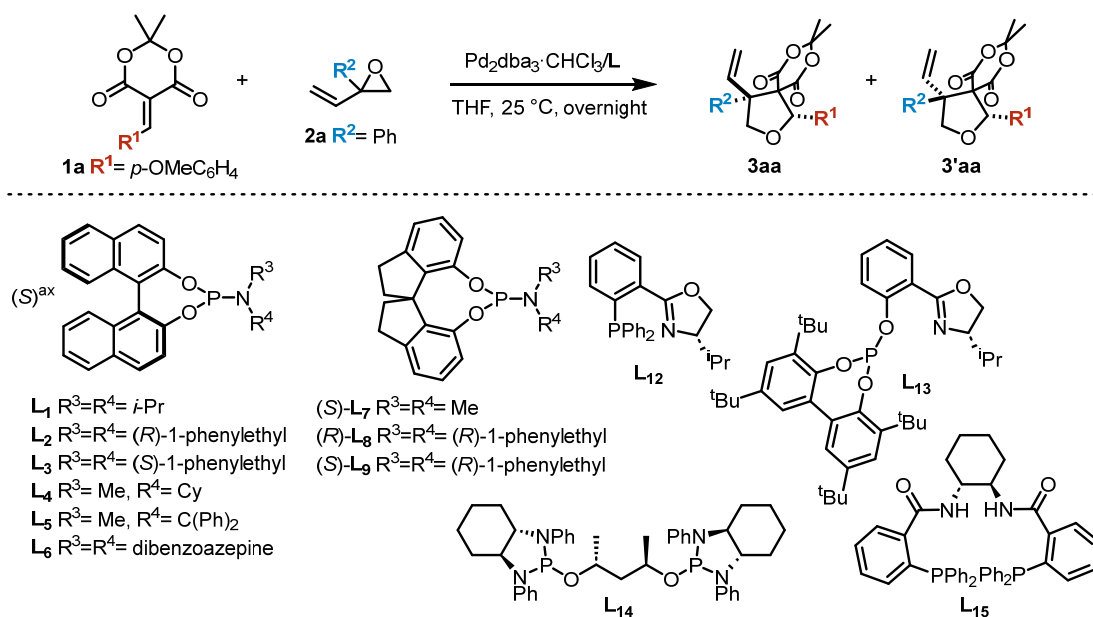

| Entry | Ligand             | %Conv <sup>b</sup> | %Yield <sup>c</sup> | <b>3aa:3'aa</b> <sup>b</sup> | %ee <sup>d</sup>   |
|-------|--------------------|--------------------|---------------------|------------------------------|--------------------|
| 1     | (S)-L <sub>1</sub> | 100                | 98                  | 8:1                          | 93 ( <i>S,R</i> )  |
| 2     | (S)-L <sub>2</sub> | <5                 | -                   | -                            | -                  |
| 3     | (S)-L <sub>3</sub> | 27                 | 19                  | 1:1                          | 22 ( <i>S,R</i> )  |
| 4     | (S)-L <sub>4</sub> | 100                | 97                  | 7:1                          | 91 ( <i>S,R</i> )  |
| 5     | (S)-L <sub>5</sub> | 100                | >99                 | 3:1                          | >99 ( <i>S,R</i> ) |
| 6     | (S)-L <sub>6</sub> | 100                | >99                 | 3:1                          | 90 ( <i>S,R</i> )  |
| 7     | (S)-L <sub>7</sub> | 100                | >99                 | 6:1                          | 33 ( <i>S,R</i> )  |
| 8     | (R)-L <sub>8</sub> | 100                | 99                  | 4:1                          | 30 ( <i>S,R</i> )  |
| 9     | (S)-L <sub>9</sub> | 50                 | 49                  | 2:1                          | 63 ( <i>S,R</i> )  |
| 10    | L <sub>12</sub>    | <5                 | -                   | -                            | -                  |
| 11    | L <sub>13</sub>    | <5                 | -                   | -                            | -                  |
| 12    | L <sub>14</sub>    | 90                 | 85                  | 3:1                          | 21 ( <i>S,R</i> )  |
| 13    | L <sub>15</sub>    | 34                 | 30                  | 2:1                          | 34 ( <i>S,R</i> )  |

<sup>a</sup> Reaction conditions: Pd<sub>2</sub>(dba)<sub>3</sub>·CHCl<sub>3</sub> (2.5 mol%), ligand (10 mol%), **1a** (0.1 mmol), **2a** (0.2 mmol), THF (1.0 mL), 25 °C, overnight. <sup>b</sup> Measured by <sup>1</sup>H-NMR. <sup>c</sup> Isolated yields as a mixture of diastereomers. <sup>d</sup> Referred to the major diastereomer and determined by HPLC using a chiral stationary phase.

## Supporting Information

### SI-4. Relative stereochemistry elucidation of **3aa** and **3'aa**

The relative stereochemistry of the two diastereomeric products arising from the [3+2] cycloaddition was established by 1D-NOE (Nuclear Overhauser Effect) experiments. Thus, for the major diastereomer **3aa**, there is a NOE interaction between the methine proton in the vinyl moiety and the methine proton at the 2-position of the tetrahydrofuran scaffold, which indicates that both protons belong to groups with a *cis* arrangement in the cycloadduct (Figure S1a). For isomer **3'aa**, however, the only NOE interaction observed for the methine proton in the vinyl moiety is the one with the methyl protons of the *p*-methoxy group in the aryl group, which indicates that the vinyl and the aryl substituents are in a *cis* arrangement in this diastereomer (Figure S1b).

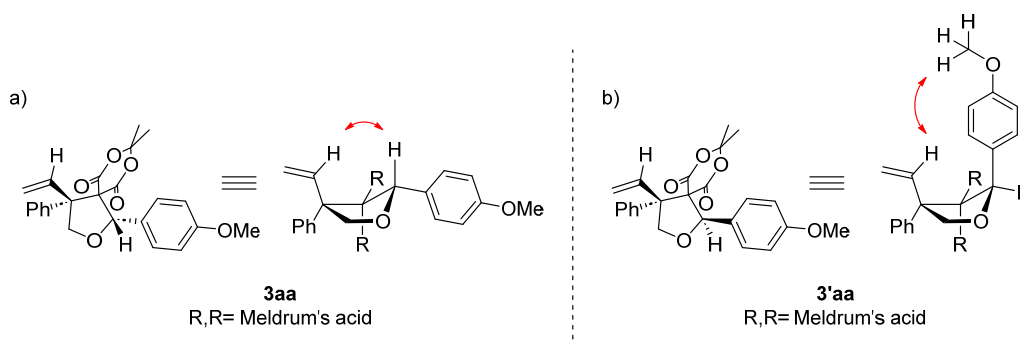

**Figure S1.** Representative NOE interactions involving the methine proton at the vinyl group in: a) major product **3aa**; and b) minor product **3'aa**. The tetrahydrofuran scaffold has been represented in a twisted conformation.

## Supporting Information

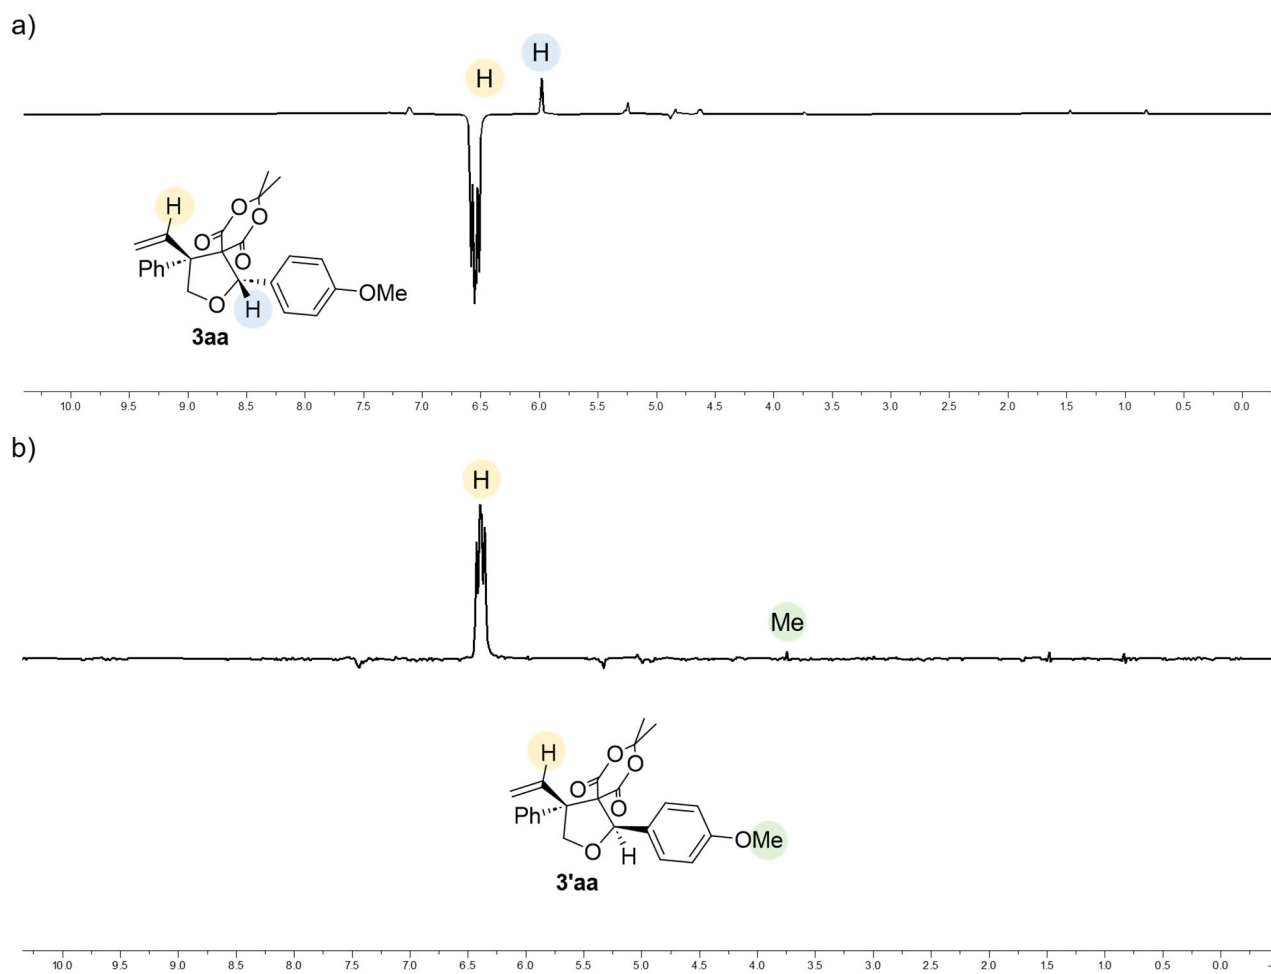

**Figure S2.** 1D-NOE spectra of: a) **3aa** irradiating at 6.55 ppm (in yellow) and b) **3'aa** irradiating at 6.55 ppm (in yellow).

## Supporting Information

### SI-5. Synthesis of polystyrene immobilized ligand PS-(*R*)-L<sub>5</sub>

**(*R*)-6-Bromo-2,2'-bis(ethoxymethoxy)-1,1'-binaphthalene** **5.** (*R*)-6-bromo-[1,1'-binaphthalene]-2,2'-diol (6.0g, 16 mmol) was dissolved in dry THF (50 mL) at 0 °C. NaH (1.5 g, 60% in mineral oil, 38 mmol) was added portionwise and the mixture was stirred during 30 minutes at this temperature. Then chloromethyl ethyl ether (3.8 mL, 41 mmol) was added dropwise and the reaction was stirred at room temperature for 3 h. Then 30 mL of water were added to quench the reaction. The aqueous phase was extracted twice with diethyl ether and purified by column chromatography (Hexanes/Ethyl acetate, 10:1). yellow oil (5.5 g, 11 mmol, 70%). <sup>1</sup>H NMR (400 MHz, CDCl<sub>3</sub>): δ = 1.02 (m, 6H, CH<sub>3</sub>), 3.38 (m, 4H, CH<sub>2</sub>), 5.02 (m, 2H, CH<sub>2</sub>), 5.14 (m, 2H, CH<sub>2</sub>), 7.01 (d, 1H, CH=, *J*<sub>H-H</sub> = 9.1 Hz), 7.08 (m, 1H, CH=), 7.21-7.29 (m, 2H, CH=), 7.32-7.36 (m, 1H, CH=), 7.60 (d, 1H, CH=, *J*<sub>H-H</sub> = 9.1 Hz), 7.63 (d, 1H, CH=, *J*<sub>H-H</sub> = 9.1 Hz), 7.86 (m, 2H, CH=), 7.95 (d, 1H, CH=, *J*<sub>H-H</sub> = 9.0 Hz), 8.02 (m, 1H, CH=). <sup>13</sup>C NMR (100.6 MHz, CDCl<sub>3</sub>): δ = 15.0, 15.0, 64.1, 64.1, 93.8, 93.9, 117.3, 117.9, 118.4, 120.5, 121.5, 124.2, 125.4, 126.5, 127.6, 128.1, 128.5, 129.6, 129.7, 129.9, 129.9, 131.0, 132.7, 133.9, 152.9, 153.2.

**(*R*)-(2,2'-Bis(ethoxymethoxy)-[1,1'-binaphthalen]-6-yl)methanol.** (*R*)-**5** (5.5 g, 11 mmol) were dissolved in dry THF (40 mL), and cooled to -88 °C. The reaction was maintained at this temperature for 2 hours. Then, DMF (8.8 ml, 110 mmol) was added dropwise, and the reaction was warmed to -50 °C, and stirred for three hours. Past this time, the reaction is warmed to room temperature, quenched with water (30 mL) and extracted with ethyl acetate twice. The organic phase was dried with MgSO<sub>4</sub> and concentrated to reduced pressure. The crude aldehyde was directly dissolved in MeOH (50 mL) and cooled to 0 °C. NaBH<sub>4</sub> (0.62 g, 17 mmol) were added, and the reaction stirred for 3 hours. 5 ml of acetone were added to quench the excess of the sodium borohydride. The solvent was evaporated, and the residue redissolved in ethyl acetate (40 mL). Water (40 mL) was added, and the aqueous phase extracted three times with ethyl acetate. The product was purified by column chromatography (Hexanes/Ethyl acetate, 10:1 → 3:1). yellow oil (2.3 g, 5.3 mmol, 48%). <sup>1</sup>H NMR (400 MHz, CDCl<sub>3</sub>): δ = 1.01 (m, 6H, CH<sub>3</sub>), 3.37 (m, 4H, CH<sub>2</sub>), 4.79 (s, 2H, CH<sub>2</sub>) 5.01 (m, 2H, CH<sub>2</sub>), 5.12 (m, 2H, CH<sub>2</sub>), 7.12 (m, 2H, CH=), 7.20 (m, 2H, CH=), 7.33 (m, 1H, CH=), 7.60 (d, 2H, CH=, *J*<sub>H-H</sub> = 9.1 Hz), 7.84 (s, 1H, CH=), 7.87 (d, 1H, CH=, *J*<sub>H-H</sub> = 8.1 Hz), 7.95 (m, 2H, CH=). <sup>13</sup>C NMR (100.6 MHz,

## Supporting Information

CDCl<sub>3</sub>):  $\delta$  = 15.0, 15.1, 64.1, 65.6, 94.0, 94.1, 117.6, 117.9, 121.2, 121.4, 122.2, 124.1, 125.6, 125.8, 126.2, 126.4, 128.0, 129.4, 129.5, 129.8, 129.9, 133.7, 134.1, 136.5, 152.9, 153.1.

**PS-(*R*)-(2,2'-bis(ethoxymethoxy)-[1,1'-binaphthalen]-6-yl)methanol.** (*R*)-(2,2'-bis(ethoxymethoxy)-[1,1'-binaphthalen]-6-yl)methanol (3.4 g, 7.8 mmol) was dissolved in dry THF at 0 °C. NaH (430 mg, 60% in mineral oil, 10.8 mmol) was added portionwise and the mixture was stirred during 30 minutes at this temperature. Then Merrifield resin (10 g,  $f=0.6$ , 6 mmol) was added and the reaction was stirred at the orbital shaker during 16 hours at room temperature. Then the mixture was filtered, and the yellowish solid was washed firstly with water, then with a 1/1 mixture water THF, two times with THF and finally, two times with acetone. The resin was dried under vacuum and characterized by NMR. All the alkyl signals could be observed in the same chemical shift as the homogeneous counterpart.

**PS-(*R*)-6-(hydroxymethyl)-[1,1'-binaphthalene]-2,2'-diol (PS-(*R*)-4).** The PS-(*R*)-(2,2'-bis(ethoxymethoxy)-[1,1'-binaphthalen]-6-yl)methanol (5 g,  $f_{\max}=0.48$ ) was suspended in dry THF (30 mL). At room temperature, 5 ml of aqueous HCl (35%) was added. The mixture was stirred 16 hours. Then the mixture was filtered and the yellowish solid was washed firstly with water two times, then with a 1/1 mixture water THF, two times with THF and finally, two times with acetone. The resin was directly used without further purification nor characterization. The resin was dried under vacuum and characterized by NMR. It could be observed that the signals corresponding to ethoxymethyl ether, have disappeared, while the CH<sub>2</sub> of the ether in the linker is slightly shifted.

**PS-(*R*)-[1,1'-binaphthalene]-2,2'-diol-N-methyl-1,1-diphenylmethanamine-phosphoramidite (PS-(*R*)-L<sub>5</sub>).** The PS-(*R*)-4 (5 g,  $f_{\max}=0.51$ , 2.5 mmol) was dried azeotropically with toluene (3x10 ml). Then the resin was suspended again in 10 ml of dry toluene and freshly distilled pyridine (0.8 ml, 10 mmol) was added. Finally, PCl<sub>3</sub> (0.44 ml, 5 mmol), were added and the reaction was stirred 16 hours at 90 °C at the orbital shaker. Then, the solution was cooled to room temperature, dried azeotropically with toluene (2x10 ml) to remove the PCl<sub>3</sub> excess and keep under vacuum for 2 hours. Pas this

## Supporting Information

time, a solution of DMAP (92 mg, 0.7 mmol) and N-methyl-1,1-diphenylmethanamine (1.5 g, 7.5 mmol) in toluene (10 ml) was added to the *in situ* generated chlorophosphite. Freshly distilled triethylamine (1.4 ml, 10 mmol) was added and the mixture was stirred 5 hours at room temperature. Then the mixture was filtered the solid was washed firstly with a 1/1 mixture water THF, two times with THF and finally, two times with dichloromethane. The resin was characterized by NMR. The functionalization (mmol of **L1**/g resin) of the resin was calculated by the elemental analysis of nitrogen using the expression:  $f(\text{mmol g}^{-1}) = \%N \times 1000 \times (\text{number of N atoms})^{-1} \times \text{MW(N)}^{-1} \times 100^{-1} = 0.41 \text{ mmol/g}$ .

## Supporting Information

### **SI-6. Typical batch procedure using well-defined PdL<sup>het</sup>L<sup>hom</sup> species for the enantioselective cycloaddition of 5-alkylidene Meldrum's acid derivatives**

A flame dried Schlenk was charged with Pd<sub>2</sub>(dba)<sub>3</sub>·CHCl<sub>3</sub> (6.5 mg, 0.006 mmol), L<sub>5</sub> (6.4 mg, 0.0125 mmol), PS-(*R*)-L<sub>5</sub> (30.5 mg, 0.0125 mmol) 5-alkylidene Meldrum's acid derivative (0.25 mmol) and vinyl epoxide (0.5 mmol). The reaction tube was sealed with rubber-septum, then purged with vacuum-argon cycles five times. Then, anhydrous THF (1 mL) was added sequentially via syringe. The resulting mixture was stirred at room temperature overnight. After that, the solvent was evaporated in vacuo. The enantiomeric excess was determined by chiral HPLC, conversions were determined by <sup>1</sup>H NMR and isolated yields were determined after column chromatography.

## Supporting Information

### SI-7. Typical flow procedure using well-defined PdL<sup>het</sup>L<sup>hom</sup> species for the enantioselective cycloaddition of 5-alkylenedene Meldrum's acid derivatives with vinyl epoxides

PS-(*R*)-L<sub>5</sub> (0.3 g) were loaded into an Omnifit® glass column (10 mm ID). Prior to the reaction, the catalyst bed was swollen by pumping dry THF at 0.2 mL/min. The system was pressurized to 5 bars, using a back pressure regulator. Two stock solutions (A) containing **1a** (1.0 eq, 0.05 M), **2a** (1.4 eq, 0.07 M) and L<sub>11</sub> (0.1 eq, 5 mM) and (B) containing the palladium precursor (0.04 eq, 2.5 mM) were prepared. Both solutions were pumped (0.1 mL/min each, 0.2 mL/min overall flow rate) by using a Syrris® Asia syringe pump and combined before the Omnifit® glass column. The different samples were collected after time periods of 10 minutes. After reaching a steady state, the palladium solution (B) was substituted by a more diluted solution (C) containing the same palladium precursor (0.015 eq, 0.75 mM), to balance the leached Pd. For all samples the yields were directly calculated by NMR samples and purified by column chromatography before checking the enantiomeric excess by chiral HPLC.

## Supporting Information

### SI-8. Detailed results of the continuous flow Pd-cycloadditions using well-defined mixed Pd species containing PS-(*R*)-L<sub>5</sub> and L<sub>11</sub>

**Table S2.** Results of the asymmetric continuous flow Pd-cycloadditions of **1a** and **2a** well-defined mixed Pd species containing PS-(*R*)-L<sub>5</sub> and L<sub>11</sub>.

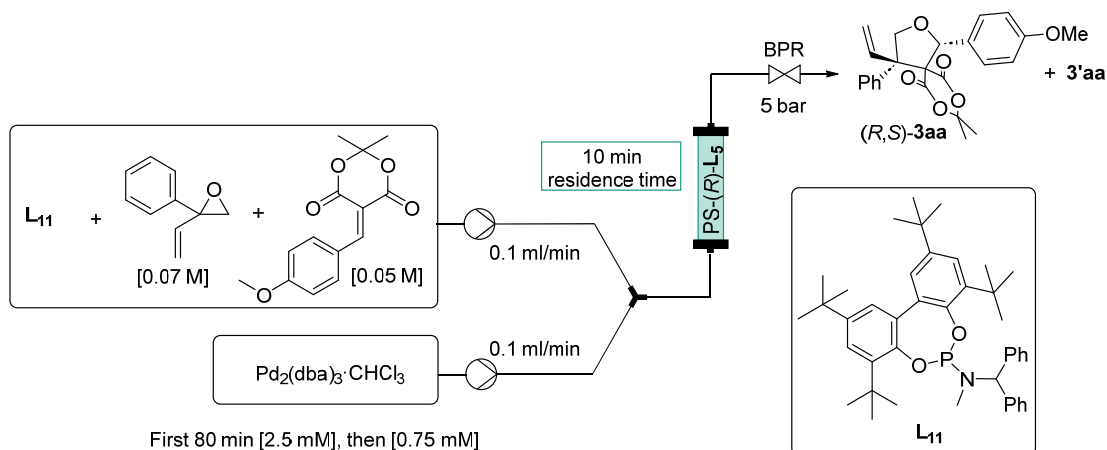

| Entry | Time (min) | Yield <b>3aa</b> + <b>3'aa</b> (%) | ee <b>3</b> (%)   |
|-------|------------|------------------------------------|-------------------|
| 1     | 30 - 50    | 72                                 | 95 ( <i>R,S</i> ) |
| 2     | 50 - 70    | 75                                 | 95 ( <i>R,S</i> ) |
| 3     | 70-90      | 86                                 | 95 ( <i>R,S</i> ) |
| 4     | 90 - 110   | 92                                 | 95 ( <i>R,S</i> ) |
| 5     | 110-130    | 79                                 | 95 ( <i>R,S</i> ) |
| 6     | 130 - 160  | 64                                 | 95 ( <i>R,S</i> ) |

**From 30 min to 160 min → 66 % isolated yield, 3/1 dr, 95 % ee**

## Supporting Information

### SI-9. Post-spiroannulation experiments. Preparation of rare lactone motifs

As previously stated, the Meldrum's acid-type fragment in **3** represents a very appealing platform for the preparation a wide array of synthetically relevant molecules due to its unique structure and the range of substituents that can be attached to it. To demonstrate the synthetic potential of the [3+2]-cycloaddition reaction established in this study, we first transformed selectively the Meldrum's moiety in compound **3aa** to the corresponding diol **6**, hydroxy-acid **7** and diacid derivative **8** (Scheme S1).

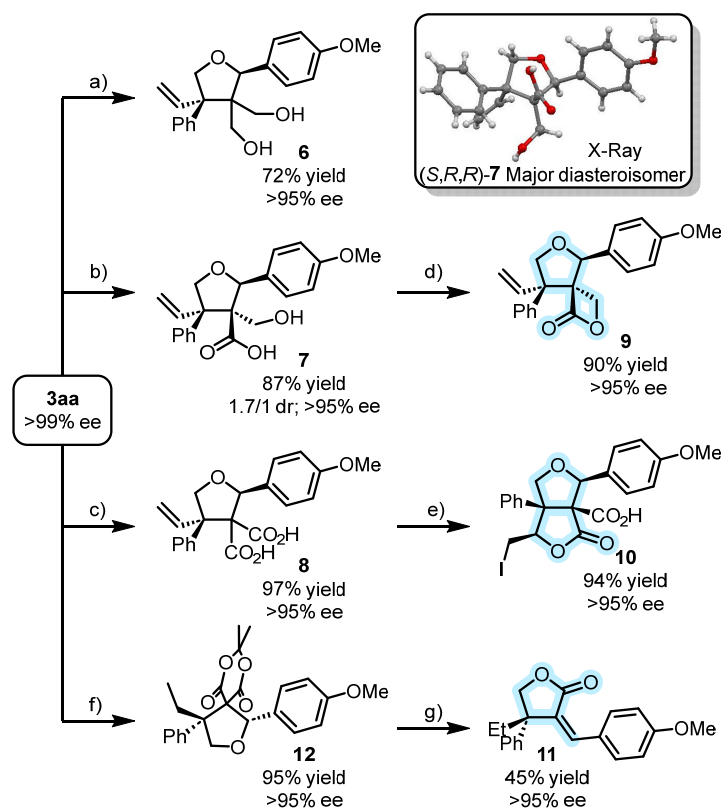

**Scheme S1.** Derivatization of model product **(S,R)-3aa**. Reaction conditions: a)  $\text{LiAlH}_4$ , THF, 70 °C, 24 h; b)  $\text{LiAlH}_4$ , THF, rt, 2 h; c) NaOH (10%), EtOH/H<sub>2</sub>O (2:1), 80 °C, 16 h; d) DEAD, PPh<sub>3</sub>, THF, rt, 4 h; e) NIS, DMAP, CH<sub>2</sub>Cl<sub>2</sub>, rt, 2 h; f)  $[\text{Ir}(\text{cod})(\text{PCy}_3)(\text{Py})]\text{BARf}$ , H<sub>2</sub> (1 bar), CH<sub>2</sub>Cl<sub>2</sub>, rt, 2 h; g) Sc(OTf)<sub>3</sub>, CH<sub>3</sub>NO, 100 °C, 0.5 h. X-Ray structure of enantiopure major diastereoisomer **7** is also shown.

Albeit hydroxy-acid **7** was formed in 1.7/1 diastereomeric ratio, both diastereomers could be easily separated by column chromatography. Interestingly, the ready access to diastereo- and enantiopure hydroxyacid **7** paved the way to the synthesis

## Supporting Information

of the chiral spirocyclic- $\beta$ -lactone derivative **9** in a straightforward manner. Note that the spiro[3,4]octane ring system present in **9** is highly unusual in the literature.<sup>38</sup> In a similar way, diacid **8** was easily transformed via iodo-lactonization to enantiopure bicyclic  $\gamma$ -lactone **10**. Finally, **3aa** could be transformed to the corresponding  $\alpha$ -benzylidene  $\gamma$ -lactone **11** by Ir-catalyzed hydrogenation of the vinyl group to yield **12** followed by Lewis-acid activation of the tetrahydrofuran ring. Note that all the lactone motifs herein developed are very rare and difficult to attain by other means and could be very useful as organic synthons as well as pharmaceuticals warheads. In particular,  $\alpha$ -alkylidene- $\gamma$ -lactones like **11** depict anticancer activity, being the subject of active research.<sup>13</sup>

## Supporting Information

### SI-10. Application of well-defined PdL<sup>het</sup>L<sup>hom</sup> species in the enantioselective allylic alkylation

Preliminary results indicate that this approach to control ML<sup>1</sup>L<sup>2</sup> speciation can also be applied to enantioselective Pd-catalyzed allylic substitution reactions. As a model reaction, we chose the reaction of *rac*-1,3-diphenyl-3-acetoxyprop-1-ene with dimethyl malonate in dichloromethane. The catalysts were generated in situ from 0.5 mol % of  $\pi$ -allyl-palladium chloride dimer [PdCl( $\eta^3$ -C<sub>3</sub>H<sub>5</sub>)]<sub>2</sub>, the corresponding ligand mixture and a catalytic amount of KOAc. The use of equimolar amounts of PS-(*R*)-L<sub>5</sub> with achiral L<sub>11</sub> provides higher enantioselectivity than that obtained under homogeneous conditions (62% vs. 40% ee; Scheme S2).

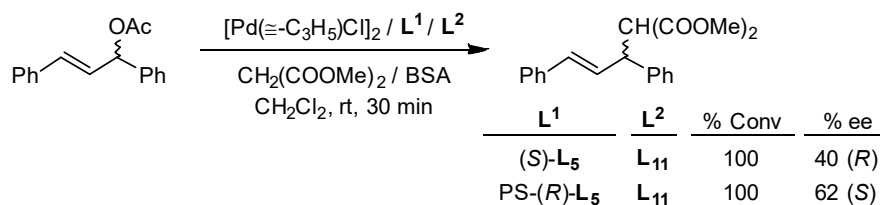

**Scheme S2.** Pd-catalyzed asymmetric allylic alkylation.

*Typical procedure for the allylic alkylation reaction.* A degassed solution of [PdCl( $\eta^3$ -C<sub>3</sub>H<sub>5</sub>)]<sub>2</sub> (1.8 mg, 0.005 mmol), L<sub>11</sub> (3.5 mg, 0.0055 mmol) and either (*S*)-L<sub>5</sub> (2.8 mg, 0.0055mmol) or PS-(*R*)-L<sub>5</sub> (13.5 mg, 0.0055mmol) in dichloromethane (1 mL) was stirred for 30 min. Subsequently, a solution of *rac*-1,3-diphenyl-3-acetoxyprop-1-ene (252 mg, 1 mmol) in dichloromethane (3 mL), dimethyl malonate (340  $\mu$ L, 3 mmol), *N,O*-bis(trimethylsilyl)-acetamide (740  $\mu$ L, 3 mmol) and a pinch of KOAc were added. The reaction mixture was stirred at room temperature. After 30 min the reaction mixture was diluted with Et<sub>2</sub>O (10 mL) and a saturated NH<sub>4</sub>Cl (aq) (25 mL) was added. The mixture was extracted with Et<sub>2</sub>O (3 x 10 mL) and the extract dried over MgSO<sub>4</sub>. Solvent was removed, conversion was measured by <sup>1</sup>H-NMR and ee was determined by HPLC.

## Supporting Information

### SI-11. Synthesis and characterization details of new alkylidene Meldrum's acid **1l** and vinyl epoxides **2f**, **2i** and **2j**

#### Preparation of 2,2-dimethyl-5-(3-(trimethylsilyl)prop-2-yn-1-ylidene)-1,3-dioxane-4,6-dione (**1l**)

Following the method developed by Bigi *et al.*<sup>4</sup> a mixture of Meldrum's acid (5.5 mmol) and 3-(trimethylsilyl)propionaldehyde (5 mmol) in water (10 mL) was stirred at 75 °C for 2 h. After cooling to room temperature, the solid product was filtered and dried under vacuum. Recrystallisation in ethanol yielded the corresponding 5-alkylidene Meldrum's acid derivative in pure form as a white solid (570 mg, 45%). <sup>1</sup>H NMR (400 MHz, CDCl<sub>3</sub>), δ= 0.15 (s, 9H, CH<sub>3</sub>), 1.61 (s, 6H, CH<sub>3</sub>), 7.35 (s, 1H, CH=). <sup>13</sup>C NMR (100.6 MHz, CDCl<sub>3</sub>), δ= 0.0, 28.6, 101.5, 105.9, 125.1, 128.2, 137.5, 158.8, 162.1.

#### Procedure for the preparation of vinyl epoxides **2f** and **2i**

Following a reported methodology,<sup>11</sup> into solution of the corresponding α-bromoacetophenone (10 mmol, 1.0 equiv) in tetrahydrofuran (50 mL, 0.2 M) was added slowly vinylmagnesium bromide (15 mL, 15 mmol, 1.0 M in THF, 1.5 equiv) at 0 °C. The reaction mixture was kept under an ice bath for 1 hour. Then, a 1M NaOH aqueous solution (20 mL) was added. The mixture was gradually warmed to room temperature and stirred for 2 hours. Subsequently, the mixture was extracted with diethyl ether. The organic layers were combined and washed with brine, then dried using Mg<sub>2</sub>SO<sub>4</sub>. The organic phase was filtered, and the solvent was removed under reduced pressure using rotary evaporation. The resulting crude product was purified using Kugelrohr distillation under vacuum.

**2-(3-Bromophenyl)-2-vinyloxirane (2f).** Colorless oil (1.8 g, 80% using 10 mmol of the corresponding α-bromoacetophenone). <sup>1</sup>H NMR (400 MHz, CDCl<sub>3</sub>), δ= 2.96 (d, 1H, CH<sub>2</sub>, *J*<sub>H-H</sub>= 5.5 Hz), 3.08 (d, 1H, CH<sub>2</sub>, *J*<sub>H-H</sub>= 5.5 Hz), 5.26 (d, CH<sub>2</sub>=, *J*<sub>H-H</sub>= 17.2 Hz, 1H), 5.35 (d, 1H, CH<sub>2</sub>=, *J*<sub>H-H</sub>= 10.3 Hz), 6.01 (dd, 1H, CH=, *J*<sub>H-H</sub>= 17.2, *J*<sub>H-H</sub>= 10.3 Hz), 7.22-7.56 (m, 4H, CH=). <sup>13</sup>C NMR (100.6 MHz, CDCl<sub>3</sub>), δ= 56.8, 59.6, 119.6, 122.4, 125.6, 129.8, 130.0, 131.0, 136.4, 140.3.

**2-(2-Methoxyphenyl)-2-vinyloxirane (2i).** Colorless oil (1.37 g, 77% using 10 mmol of the corresponding α-bromoacetophenone). <sup>1</sup>H NMR (400 MHz, CDCl<sub>3</sub>), δ= 2.89 (d, 1H, CH<sub>2</sub>, *J*<sub>H-H</sub>= 5.5 Hz), 2.96 (d, 1H, CH<sub>2</sub>, *J*<sub>H-H</sub>= 5.5 Hz), 3.73 (s, 3H, CH<sub>3</sub>), 4.97 (d, 1H,

## Supporting Information

CH<sub>2</sub>=,  $J_{\text{H-H}} = 17.1$ ), 5.10 (d 1H, CH<sub>2</sub>=,  $J_{\text{H-H}} = 10.6$ ), 5.79 (dd, 1H, CH=,  $J_{\text{H-H}} = 17.1$ ,  $J_{\text{H-H}} = 10.6$  Hz), 6.78-6.86 (m, 2H, CH=), 7.25-7.28 (m, 2H, CH=). <sup>13</sup>C NMR (100.6 MHz, CDCl<sub>3</sub>),  $\delta = 55.4, 56.0, 58.6, 110.5, 117.7, 120.5, 126.4, 128.9, 129.3, 138.1, 157.4$ .

### Preparation of 2-((benzyloxy)methyl)-2-vinyloxirane (2j)

Following a modified procedure from the literature<sup>14</sup> a solution of 2-((benzyloxy)methyl)oxirane (10.0 mmol)<sup>15</sup> in CHCl<sub>3</sub> (100 ml) was treated with concentrated HCl (30 mL) then stirred at room temperature until no starting material was observed (TLC). The organic phase was then washed with saturated aqueous NaHCO<sub>3</sub> and water and subsequently evaporated. The resulting crude of 1-(benzyloxy)-3-chloropropan-2-ol was used in the next step without further purification.

Then, to a stirred solution of 1-(benzyloxy)-3-chloropropan-2-ol (5.3 mmol) in acetone (11.6 mL) at 5 °C, a solution of H<sub>2</sub>CrO<sub>3</sub> (prepared from H<sub>2</sub>SO<sub>4</sub> (0.6 mL), CrO<sub>3</sub> (771 mg) and water (1.4 mL)) was added dropwise over 2 h. Next, the mixture was stirred until no starting product was observed (TLC) and subsequently quenched by the dropwise addition of 2-propanol (1.6 mL). The inorganic precipitate was then filtered off and washed with acetone (2x6 mL). The solvent was evaporated and to the resulting crude product water (70 mL) was added. The mixture was extracted with CHCl<sub>3</sub> (3x6 mL) and the organic layer washed with water (3x5 mL), dried over anhydrous Mg<sub>2</sub>SO<sub>4</sub> and evaporated. The resulting crude 1-(benzyloxy)-3-chloropropan-2-ol was used in the next step without further purification. Then, the corresponding vinyl epoxide was prepared by the same means as in Section 5.1.4.2. Colorless oil (480 mg, 25% over 3 steps). <sup>1</sup>H NMR (400 MHz, CDCl<sub>3</sub>),  $\delta = 2.71$  (d, 1H, CH<sub>2</sub>,  $J_{\text{H-H}} = 6.3$  Hz), 2.94 (d, 1H, CH<sub>2</sub>,  $J_{\text{H-H}} = 6.3$  Hz), 3.63 (d, 1H, CH<sub>2</sub>,  $J_{\text{H-H}} = 10.9$  Hz), 3.77 (d, 1H, CH<sub>2</sub>,  $J_{\text{H-H}} = 10.9$  Hz), 4.57 (d, 1H, CH<sub>2</sub>,  $J_{\text{H-H}} = 11.9$  Hz), 4.61 (dd, 1H, CH<sub>2</sub>,  $J_{\text{H-H}} = 20.9$  Hz,  $J_{\text{H-H}} = 11.9$  Hz), 5.28 (d, 1H, CH<sub>2</sub>=,  $J_{\text{H-H}} = 11.0$  Hz), 5.46 (d, 1H, CH<sub>2</sub>=,  $J_{\text{H-H}} = 17.3$  Hz), 5.86 (dd, 1H, CH=,  $J_{\text{H-H}} = 17.3$ ,  $J_{\text{H-H}} = 11.0$  Hz), 7.25-7.37 (m, 5H, CH=). <sup>13</sup>C NMR (100.6 MHz, CDCl<sub>3</sub>),  $\delta = 52.9, 57.6, 71.2, 73.2, 117.5, 127.7, 127.8, 127.9, 128.4, 134.9, 137.8$ .

## Supporting Information

### SI-12. Isolation and characterization details of tetrahydrofuran-fused spirocyclic Meldrum's acid derivatives 3

**1-(4-Methoxyphenyl)-8,8-dimethyl-4-phenyl-4-vinyl-2,7,9-trioxaspiro[4.5]decane-6,10-dione (3aa).** The title compound was isolated through column chromatography (SiO<sub>2</sub>, petroleum ether/ethyl acetate 4:1) as a white solid (91.9 mg, 90%). Enantiomeric excess determined by HPLC using Chiralcel AD column (hexane/2-propanol=90/10, 0.5 mL/min, 220 nm). *t<sub>R</sub>* 31.7 min (*S,R*); *t<sub>R</sub>* 35.7 min (*R,S*). <sup>1</sup>H NMR (400 MHz, CDCl<sub>3</sub>), δ: 0.79 (s, 3H, CH<sub>3</sub>), 1.37 (s, 3H, CH<sub>3</sub>), 3.70 (s, 3H, CH<sub>3</sub>), 4.58 (d, 1H, CH<sub>2</sub>, *J<sub>H-H</sub>* = 7.8 Hz), 4.81 (d, 1H, CH<sub>2</sub>=, *J<sub>H-H</sub>* = 17.0 Hz), 5.21 (1H, CH<sub>2</sub>=, *J<sub>H-H</sub>* = 10.9 Hz), 5.43 (d, 1H, CH<sub>2</sub>, *J<sub>H-H</sub>* = 7.8 Hz), 5.93 (s, 1H, CH), 6.50 (dd, *J<sub>H-H</sub>* = 17.0, 10.9 Hz, 1H), 6.77 (d, 2H, CH=, *J<sub>H-H</sub>* = 8.3 Hz), 7.06 (d, CH=, 2H, *J<sub>H-H</sub>* = 6.91 Hz), 7.19-7.30 (m, 5H, CH=). <sup>13</sup>C NMR (100.6 MHz, CDCl<sub>3</sub>), δ: 27.9, 30.1, 55.2, 64.9, 68.2, 76.4, 87.0, 105.5, 113.9, 115.4, 127.2, 127.3, 127.5, 127.8, 128.5, 129.1, 138.3, 141.0, 160.2, 162.7, 165.5. HRMS (ESI-TOF) *m/z*: [M + Na]<sup>+</sup> Calcd for C<sub>24</sub>H<sub>24</sub>O<sub>6</sub>Na 431.1465; Found 431.1469. Crystals suitable for X-Ray diffraction were obtained by adding isopropanol to a dichloromethane solution.

**8,8-Dimethyl-4-phenyl-1-(4-(trifluoromethyl)phenyl)-4-vinyl-2,7,9-trioxaspiro[4.5]decane-6,10-dione (3ba).** The title compound was isolated through column chromatography (SiO<sub>2</sub>, petroleum ether/ethyl acetate 10:1) as a white solid (110.4 mg, 99%). Enantiomeric excess determined by HPLC using Chiralcel IA column (hexane/2-propanol=95/5, 1 mL/min, 220 nm). *t<sub>R</sub>* 8.4 min (*R,S*); *t<sub>R</sub>* 10.2 min (*S,R*). <sup>1</sup>H NMR (400 MHz, CDCl<sub>3</sub>), δ: 0.83 (s, 3H, CH<sub>3</sub>), 1.38 (s, 3H, CH<sub>3</sub>), 4.60 (d, 1H, CH<sub>2</sub>=, *J<sub>H-H</sub>* 8.6 Hz), 4.93 (d, 1H, CH<sub>2</sub>=, *J<sub>H-H</sub>* = 16.9 Hz), 5.28 (d, 1H, CH<sub>2</sub>=, *J<sub>H-H</sub>* = 11.1 Hz), 5.46 (d, 1H, CH<sub>2</sub>, *J<sub>H-H</sub>* 8.6 Hz), 6.05 (s, 1H, CH), 6.50 (dd, 1H, CH<sub>2</sub>, *J<sub>H-H</sub>* = 16.9, *J<sub>H-H</sub>* = 11.1 Hz), 7.09-7.11 (m, 2H, CH=), 7.24-7.28 (m, 4H, CH=), 7.51 (s, 3H, CH=). <sup>13</sup>C NMR (100.6 MHz, CDCl<sub>3</sub>), δ: 27.7, 30.5, 64.8, 68.3, 76.2, 86.0, 105.7, 115.8, 116.2, 125.4, 125.5, 127.4, 128.0, 128.2, 128.6, 137.3, 140.1, 140.6, 162.4, 165.2. <sup>19</sup>F{<sup>1</sup>H} NMR (376 MHz, CDCl<sub>3</sub>), δ: -62.8. HRMS (ESI-TOF) *m/z*: [M + Na]<sup>+</sup> Calcd for C<sub>24</sub>H<sub>21</sub>F<sub>3</sub>O<sub>5</sub>Na 469.1233; Found 469.1238.

**8,8-Dimethyl-4-phenyl-1-(*p*-tolyl)-4-vinyl-2,7,9-trioxaspiro[4.5]decane-6,10-dione (3ca).** The title compound was isolated through column chromatography (SiO<sub>2</sub>, petroleum ether/ethyl acetate 10:1) as a white solid (97.1 mg, 99%). Enantiomeric excess determined

## Supporting Information

by HPLC using Chiralcel OX-H column (hexane/2-propanol=95/5, flow 1 mL/min, 220 nm).  $t_R$  12.4 min (*S,R*);  $t_R$  18.2 min (*R,S*).  $^1\text{H}$  NMR (400 MHz,  $\text{CDCl}_3$ ),  $\delta$ : 0.77 (s, 3H,  $\text{CH}_3$ ), 1.41 (s, 3H,  $\text{CH}_3$ ), 2.23 (s, 3H,  $\text{CH}_3$ ), 4.58 (d, 1H,  $\text{CH}_2$ ,  $J_{\text{H-H}} = 7.9$  Hz), 4.82 (d, 1H,  $\text{CH}_2=$ ,  $J_{\text{H-H}} = 16.2$  Hz), 5.21 (d,  $\text{CH}_2=$ , 1H,  $J_{\text{H-H}} = 10.3$  Hz), 5.44 (d,  $\text{CH}_2$ , 1H,  $J_{\text{H-H}} = 7.9$  Hz), 5.95 (s, 1H, CH), 6.51 (dd, 1H,  $\text{CH} =$ ,  $J_{\text{H-H}} = 16.2$ ,  $J_{\text{H-H}} = 10.3$  Hz), 7.04-7.08 (m, 4H,  $\text{CH} =$ ), 7.19-7.26 (m, 5H,  $\text{CH} =$ ).  $^{13}\text{C}\{^1\text{H}\}$  NMR (100.6 MHz,  $\text{CDCl}_3$ ),  $\delta$ : 21.2, 28.0, 30.1, 64.9, 68.2, 76.4, 87.1, 105.5, 115.4, 127.2, 127.5, 127.8, 128.5, 129.2, 132.5, 138.2, 139.0, 141.0, 162.6, 165.4. HRMS (ESI-TOF)  $m/z$ :  $[\text{M} + \text{Na}]^+$  Calcd for  $\text{C}_{24}\text{H}_{24}\text{O}_5\text{Na}$  415.1516; Found 415.1621.

**1-(4-Bromophenyl)-8,8-dimethyl-4-phenyl-4-vinyl-2,7,9-trioxaspiro[4.5] decane-6,10-dione (3da).** The title compound was isolated through column chromatography ( $\text{SiO}_2$ , petroleum ether/ethyl acetate 10:1) as a white solid (112.0 mg, 98%). Enantiomeric excess determined by HPLC using Chiralcel AD column (hexane/2-propanol=98/2, 1 mL/min, 220 nm).  $t_R$  22.2 min (*R,S*);  $t_R$  28.2 min (*S,R*).  $^1\text{H}$  NMR (400 MHz,  $\text{CDCl}_3$ ),  $\delta$ : 0.93 (s, 3H,  $\text{CH}_3$ ), 1.47 (s, 3H,  $\text{CH}_3$ ), 4.65 (d, 1H,  $\text{CH}_2$ ,  $J_{\text{H-H}} = 7.9$  Hz), 4.96 (d, 1H,  $\text{CH}_2=$ ,  $J_{\text{H-H}} = 16.8$  Hz), 5.32 (d, 1H,  $\text{CH}_2=$ ,  $J_{\text{H-H}} = 10.3$  Hz), 5.50 (d, 1H,  $\text{CH}_2$ ,  $J_{\text{H-H}} = 7.9$  Hz), 6.02 (s, 1H, CH), 6.56 (dd, 1H,  $\text{CH} =$ ,  $J_{\text{H-H}} = 16.8$ ,  $J_{\text{H-H}} = 10.3$  Hz), 7.14 (d, 2H,  $\text{CH} =$ ,  $J_{\text{H-H}} = 7.2$  Hz), 7.29-7.35 (m, 5H,  $\text{CH} =$ ), 7.45 (d, 2H,  $\text{CH} =$ ,  $J_{\text{H-H}} = 7.2$  Hz).  $^{13}\text{C}\{^1\text{H}\}$  NMR (100.6 MHz,  $\text{CDCl}_3$ ),  $\delta$ : 27.7, 30.5, 64.8, 68.1, 76.2, 86.2, 105.6, 115.9, 123.1, 127.2, 128.1, 128.6, 129.3, 131.6, 134.9, 137.5, 140.3, 162.5, 165.2. HRMS (ESI-TOF)  $m/z$ :  $[\text{M} + \text{Na}]^+$  Calcd for  $\text{C}_{23}\text{H}_{21}\text{BrO}_5\text{Na}$  479.0465; Found 479.0471.

**1-(3-Bromophenyl)-8,8-dimethyl-4-phenyl-4-vinyl-2,7,9-trioxaspiro[4.5] decane-6,10-dione (3ea).** The title compound was isolated through column chromatography ( $\text{SiO}_2$ , petroleum ether/ethyl acetate 10:1) as a white solid (112.1 mg, 98%). Enantiomeric excess determined by HPLC using Chiralcel AD column (hexane/2-propanol=98/2, 1 mL/min, 220 nm).  $t_R$  15.3 min (*R,S*);  $t_R$  25.6 min (*S,R*).  $^1\text{H}$  NMR (400 MHz,  $\text{CDCl}_3$ ),  $\delta$ : 0.99 (s, 3H,  $\text{CH}_3$ ), 1.49 (s, 3H,  $\text{CH}_3$ ), 4.67 (d, 1H,  $\text{CH}_2$ ,  $J_{\text{H-H}} = 8.1$  Hz), 4.98 (d, 1H,  $\text{CH}_2=$ ,  $J_{\text{H-H}} = 17.3$  Hz), 5.35 (d, 1H,  $\text{CH}_2=$ ,  $J_{\text{H-H}} = 11.0$  Hz), 5.53 (d, 1H,  $\text{CH}_2$ ,  $J_{\text{H-H}} = 8.1$  Hz), 6.06 (s, 1H, CH), 6.58 (dd, 1H,  $\text{CH} =$ ,  $J_{\text{H-H}} = 17.3$ ,  $J_{\text{H-H}} = 11.0$  Hz), 7.17-7.46 (m, 8H,  $\text{CH} =$ ), 7.60 (s, 1H,  $\text{CH} =$ ).  $^{13}\text{C}$  NMR (100.6 MHz,  $\text{CDCl}_3$ ),  $\delta$ : 27.8, 30.5, 64.8, 68.2, 76.3, 86.0, 105.7, 116.0, 122.6, 126.1, 127.3, 128.1, 128.6 (2C), 130.1, 130.5, 132.2, 137.4, 138.3, 140.3, 162.4, 165.2. HRMS (ESI-TOF)  $m/z$ :  $[\text{M} + \text{Na}]^+$  Calcd for  $\text{C}_{23}\text{H}_{21}\text{BrO}_5\text{Na}$  479.0465; Found 479.0470.

## Supporting Information

**8,8-Dimethyl-1-(naphthalen-2-yl)-4-phenyl-4-vinyl-2,7,9-trioxaspiro[4.5] decane-6,10-dione (3fa).** The title compound was isolated through column chromatography (SiO<sub>2</sub>, petroleum ether/ethyl acetate 10:1) as a white solid (105.3 mg, 99%). Enantiomeric excess determined by HPLC using Chiralcel AD column (hexane/2-propanol=80/20, 1 mL/min, 220 nm). *t<sub>R</sub>* 15.5 min (*R,S*); *t<sub>R</sub>* 25.0 min (*S,R*). <sup>1</sup>H NMR (400 MHz, CDCl<sub>3</sub>), δ: 0.72 (s, 3H, CH<sub>3</sub>), 1.43 (s, 3H, CH<sub>3</sub>), 4.72 (d, 1H, CH<sub>2</sub>, *J*<sub>H-H</sub>= 8.4 Hz), 4.97 (d, 1H, CH<sub>2</sub>=, *J*<sub>H-H</sub>= 16.5 Hz), 5.34 (d, 1H, CH<sub>2</sub>=, *J*<sub>H-H</sub>= 10.3 Hz), 5.60 (d, 1H, CH<sub>2</sub>, *J*<sub>H-H</sub>= 8.4 Hz), 6.26 (s, 1H, CH), 6.64 (dd, 1H, CH=, *J*<sub>H-H</sub>= 16.5, *J*<sub>H-H</sub>= 10.3 Hz), 7.17-7.19 (m, 2H, CH=), 7.26-7.34 (m, 3H, CH=), 7.46-7.56 (m, 3H, CH=), 7.79-7.81 (m, 3H, CH=), 7.93 (s, 1H, CH=). <sup>13</sup>C NMR (100.6 MHz, CDCl<sub>3</sub>), δ: 27.8, 30.2, 64.9, 68.3, 76.4, 87.1, 87.2, 105.6, 115.7, 124.8, 126.4, 126.5, 127.0, 127.3, 127.6, 127.9, 128.2, 128.3, 128.5, 132.9, 133.2, 133.5, 137.8, 140.7, 140.8, 162.6, 165.5. HRMS (ESI-TOF) *m/z*: [M + Na]<sup>+</sup> Calcd for C<sub>27</sub>H<sub>24</sub>O<sub>5</sub>Na 451.1516; Found 451.1521.

**1-(2-Bromophenyl)-8,8-dimethyl-4-phenyl-4-vinyl-2,7,9-trioxaspiro[4.5] decane-6,10-dione (3ga).** The title compound was isolated through column chromatography (SiO<sub>2</sub>, petroleum ether/ethyl acetate 10:1) as a white solid (112.0 mg, 98%). Enantiomeric excess determined by HPLC using Chiralcel OX-H column (hexane/2-propanol=98/2, 1 mL/min, 220 nm). *t<sub>R</sub>* 16.1 min (*S,R*); *t<sub>R</sub>* 20.2 min (*R,S*). <sup>1</sup>H NMR (400 MHz, CDCl<sub>3</sub>), δ: 1.13 (s, 3H, CH<sub>3</sub>), 1.54 (s, 3H, CH<sub>3</sub>), 4.58 (d, 1H, CH<sub>2</sub>, *J*<sub>H-H</sub>= 8.4 Hz), 4.73 (d, 1H, CH<sub>2</sub>=, *J*<sub>H-H</sub>= 17.8 Hz), 5.25 (d, 1H, CH<sub>2</sub>=, *J*<sub>H-H</sub>= 11.4 Hz), 5.59 (d, 1H, CH<sub>2</sub>, *J*<sub>H-H</sub>= 8.4 Hz), 6.45 (s, 1H, CH), 6.73 (dd, 1H, CH=, *J*<sub>H-H</sub>= 17.8, *J*<sub>H-H</sub>= 11.4 Hz), 7.12-7.14 (m, 3H, CH=), 7.26-7.36 (m, 4H, CH=), 7.47 (d, 1H, CH=, *J*<sub>H-H</sub>= 7.9 Hz), 7.75 (d, 1H, CH=, *J*<sub>H-H</sub>= 7.9 Hz). <sup>13</sup>C NMR (100.6 MHz, CDCl<sub>3</sub>), δ: 28.4, 29.9, 66.5, 66.9, 77.5, 85.4, 105.3, 115.3, 122.5, 127.4, 127.7, 128.5, 130.4, 132.0, 132.4, 136.1, 137.6, 141.2 (2C), 162.8, 164.3. HRMS (ESI-TOF) *m/z*: [M + Na]<sup>+</sup> Calcd for C<sub>23</sub>H<sub>21</sub>BrO<sub>5</sub>Na 479.0465; Found 479.0470.

**8,8-Dimethyl-1-(naphthalen-1-yl)-4-phenyl-4-vinyl-2,7,9-trioxaspiro[4.5] decane-6,10-dione (3ha).** The title compound was isolated through column chromatography (SiO<sub>2</sub>, petroleum ether/ethyl acetate 10:1) as a white solid (104.5 mg, 98%). Enantiomeric excess determined by HPLC using Chiralcel AD column (hexane/2-propanol=95/5, 1 mL/min, 220 nm). *t<sub>R</sub>* 17.8 min (*R,S*); *t<sub>R</sub>* 35.7 min (*S,R*). <sup>1</sup>H NMR (400 MHz, CDCl<sub>3</sub>), δ: 0.16 (s, 3H, CH<sub>3</sub>), 1.27 (s, 3H, CH<sub>3</sub>), 4.61 (d, 1H, CH<sub>2</sub>, *J*<sub>H-H</sub>= 7.9 Hz), 4.76 (d, 1H, CH<sub>2</sub>=, *J*<sub>H-H</sub>= 16.7 Hz), 5.21 (d, 1H, CH<sub>2</sub>=, *J*<sub>H-H</sub>= 10.4 Hz), 5.59 (d, 1H, CH<sub>2</sub>, *J*<sub>H-H</sub>= 7.9 Hz), 6.68 (dd, 1H, CH=, *J*<sub>H-H</sub>= 16.7, *J*<sub>H-H</sub>= 10.4 Hz), 6.84 (s, 1H, CH), 7.02-7.05 (m, 2H, CH=),

## Supporting Information

7.21-7.23 (m, 2H, CH=), 7.34-7.43 (m, 3H, CH=), 7.67-7.70 (m, 2H, CH=), 7.86-7.94 (m, 2H, CH=).  $^{13}\text{C}$  NMR (100.6 MHz,  $\text{CDCl}_3$ ),  $\delta$ : 28.2, 29.0, 66.1, 67.6, 77.1, 82.8, 105.1, 115.1, 123.0, 125.6, 125.7, 126.9, 127.2 (2C), 127.8, 128.5, 128.9, 129.4, 130.6, 131.5, 133.3, 138.2, 141.6, 162.6, 165.5. HRMS (ESI-TOF)  $m/z$ :  $[\text{M} + \text{Na}]^+$  Calcd for  $\text{C}_{27}\text{H}_{24}\text{O}_5\text{Na}$  451.1516; Found 451.1520.

**1-(Furan-2-yl)-8,8-dimethyl-4-phenyl-4-vinyl-2,7,9-trioxaspiro[4.5]-decane-6,10-dione (3ia).** The title compound was isolated through column chromatography ( $\text{SiO}_2$ , petroleum ether/ethyl acetate 4:1) as a white solid (81.0 mg, 88%). Enantiomeric excess determined by HPLC using Chiralcel AD column (hexane/2-propanol=95/5, 1 mL/min, 220 nm).  $t_{\text{R}}$  14.3 min (*R,S*);  $t_{\text{R}}$  31.6 min (*S,R*).  $^1\text{H}$  NMR (400 MHz,  $\text{CDCl}_3$ ),  $\delta$ : 1.12 (s, 3H,  $\text{CH}_3$ ), 1.56 (s, 3H,  $\text{CH}_3$ ), 4.58 (d, 1H,  $\text{CH}_2$ ,  $J_{\text{H-H}} = 9.2$  Hz), 4.87 (d, 1H,  $\text{CH}_2=$ ,  $J_{\text{H-H}} = 16.7$  Hz), 5.27 (d, 1H,  $\text{CH}_2=$ ,  $J_{\text{H-H}} = 10.3$  Hz), 5.44 (d, 1H,  $\text{CH}_2$ ,  $J_{\text{H-H}} = 9.2$  Hz), 6.02 (s, 1H, CH, CH=), 6.35-6.36 (m, 1H, CH=), 6.46-6.53 (m, 2H, CH=), 7.12-7-14 (m, 2H, CH=), 7.26-7.35 (m, 5H, CH=).  $^{13}\text{C}$  NMR (100.6 MHz,  $\text{CDCl}_3$ ),  $\delta$ : 27.7, 29.5, 64.9, 66.3, 76.2, 81.1, 105.5, 110.7, 111.2, 115.8, 127.2, 128.0, 128.6, 137.5, 140.3, 142.5, 149.0, 162.9, 165.0. HRMS (ESI-TOF)  $m/z$ :  $[\text{M} + \text{Na}]^+$  Calcd for  $\text{C}_{21}\text{H}_{20}\text{O}_6\text{Na}$  391.1152; Found 391.1158.

**8,8-Dimethyl-4-phenyl-1-(thiophen-2-yl)-4-vinyl-2,7,9-trioxaspiro[4.5] decane-6,10-dione (3ja).** The title compound was isolated through column chromatography ( $\text{SiO}_2$ , petroleum ether/ethyl acetate 4:1) as a white solid (89.3 mg, 93%). Enantiomeric excess determined by HPLC using Chiralcel IA column (hexane/2-propanol=80/20, 1 mL/min, 220 nm).  $t_{\text{R}}$  7.5 min (*R,S*);  $t_{\text{R}}$  11.1 min (*S,R*).  $^1\text{H}$  NMR (400 MHz,  $\text{CDCl}_3$ ),  $\delta$ : 0.95 (s, 3H,  $\text{CH}_3$ ), 1.52 (s, 3H,  $\text{CH}_3$ ), 4.63 (d, 1H,  $\text{CH}_2$ ,  $J_{\text{H-H}} = 8.2$  Hz), 4.93 (d, 1H,  $\text{CH}_2=$ ,  $J_{\text{H-H}} = 17.3$  Hz), 5.30 (d, 1H,  $\text{CH}_2=$ ,  $J_{\text{H-H}} = 11.4$  Hz), 5.48 (d, 1H,  $\text{CH}_2$ ,  $J_{\text{H-H}} = 8.2$  Hz), 6.27 (s, 1H, CH), 6.50 (dd, 1H, CH,  $J_{\text{H-H}} = 17.3$ ,  $J_{\text{H-H}} = 11.4$  Hz), 6.94-6.96 (m, 2H, CH=), 7.26-7.32 (m, 4H, CH=).  $^{13}\text{C}$  NMR (100.6 MHz,  $\text{CDCl}_3$ ),  $\delta$ : 27.8, 30.2, 76.0, 83.5, 105.7, 115.7, 126.6, 127.1, 127.2, 127.3, 128.0, 128.6, 137.9, 138.0, 140.5, 163.1, 165.1. HRMS (ESI-TOF)  $m/z$ :  $[\text{M} + \text{Na}]^+$  Calcd for  $\text{C}_{21}\text{H}_{20}\text{O}_5\text{SNa}$  407.0924; Found 407.0929.

**1-(tert-Butyl)-8,8-dimethyl-4-phenyl-4-vinyl-2,7,9-trioxaspiro[4.5]decane -6,10-dione (3ka).** The title compound was isolated through column chromatography ( $\text{SiO}_2$ , petroleum ether/ethyl acetate 10:1) as a white solid (88.7 mg, 99%). Enantiomeric excess determined by HPLC using Chiralcel AD column (98% hexane/2-propanol, flow 0.5 mL/min).  $t_{\text{R}}$  16.8 min (*R,S*);  $t_{\text{R}}$  23.2 min (*S,R*).  $^1\text{H}$  NMR (400 MHz,  $\text{CDCl}_3$ ),  $\delta$ : 0.93 (s,

## Supporting Information

9H, CH<sub>3</sub>), 1.21 (s, 3H, CH<sub>3</sub>), 1.63 (s, 3H, CH<sub>3</sub>), 4.33 (d, 1H,  $J_{H-H}$  = 7.4 Hz), 4.65 (s, 1H, CH), 4.93 (d, 1H, CH<sub>2</sub>,  $J_{H-H}$  = 16.8 Hz), 5.23 (d, 1H, CH<sub>2</sub>=,  $J_{H-H}$  = 11.4 Hz), 5.34 (d, 1H, CH<sub>2</sub>,  $J_{H-H}$  = 7.4 Hz), 6.59 (dd, 1H, CH=,  $J_{H-H}$  = 16.8,  $J_{H-H}$  = 11.4 Hz), 7.16-7.26 (m, 5H, CH=). <sup>13</sup>C NMR (100.6 MHz, CDCl<sub>3</sub>),  $\delta$ : 27.1, 29.4, 29.5, 34.6, 62.9, 63.0, 73.2, 94.5, 105.8, 115.6, 128.0, 128.1, 128.5, 128.8, 137.4, 141.2, 143.4, 163.1, 164.5. HRMS (ESI-TOF)  $m/z$ : [M + Na]<sup>+</sup> Calcd for C<sub>21</sub>H<sub>26</sub>O<sub>5</sub>Na 381.1674; Found 381.1679.

**8,8-Dimethyl-4-phenyl-1-((trimethylsilyl)ethynyl)-4-vinyl-2,7,9-trioxaspiro [4.5]decane-6,10-dione (3la).** The title compound was isolated through column chromatography (SiO<sub>2</sub>, petroleum ether/ethyl acetate 10:1) as a white solid (98.6 mg, 99%). Enantiomeric excess determined by HPLC using Chiralcel OX-H column (hexane/2-propanol = 90/10, 1 mL/min, 220 nm).  $t_R$  5.2 min (*S,R*);  $t_R$  6.5 min (*R,S*). <sup>1</sup>H NMR (400 MHz, CDCl<sub>3</sub>),  $\delta$ : 0.12 (s, 9H, CH<sub>3</sub>), 1.62 (s, 3H, CH<sub>3</sub>), 1.76 (s, 3H, CH<sub>3</sub>), 4.43 (d, 1H, CH<sub>2</sub>,  $J_{H-H}$  = 8.2 Hz), 4.81 (d, 1H, CH<sub>2</sub>=,  $J_{H-H}$  = 17.9 Hz), 5.23 (d, 1H, CH<sub>2</sub>=,  $J_{H-H}$  = 10.8 Hz), 5.36 (d, 1H, CH<sub>2</sub>,  $J_{H-H}$  = 8.2 Hz), 5.58 (s, 1H, CH), 6.39 (dd, 1H,  $J_{H-H}$  = 17.9,  $J_{H-H}$  = 10.8 Hz), 7.10-7.12 (m, 2H, CH=), 7.30-7.33 (m, 3H, CH=). <sup>13</sup>C NMR (100.6 MHz, CDCl<sub>3</sub>),  $\delta$ : -0.5, 27.3, 31.4, 64.7, 67.3, 74.8, 76.6, 95.9, 99.5, 105.4, 116.4, 127.4, 128.2, 128.5, 136.3, 139.4, 163.3, 165.1. HRMS (ESI-TOF)  $m/z$ : [M + Na]<sup>+</sup> Calcd for C<sub>22</sub>H<sub>26</sub>O<sub>5</sub>SiNa 421.1442; Found 421.1449.

**1-(4-Methoxyphenyl)-8,8-dimethyl-4-(*p*-tolyl)-4-vinyl-2,7,9-trioxaspiro[4.5]decane-6,10-dione (3ab).** The title compound was isolated through column chromatography (SiO<sub>2</sub>, petroleum ether/ethyl acetate 4:1) as a white solid (103.5 mg, 98%). Enantiomeric excess determined by HPLC using Chiralcel AD column (hexane/2-propanol = 98/2, 1 mL/min, 220 nm).  $t_R$  36.0 min (*R,S*);  $t_R$  46.1 min (*S,R*). <sup>1</sup>H NMR (400 MHz, CDCl<sub>3</sub>),  $\delta$ : 0.79 (s, 3H, CH<sub>3</sub>), 1.43 (s, 3H, CH<sub>3</sub>), 2.25 (s, 3H, CH<sub>3</sub>), 3.70 (s, 3H, CH<sub>3</sub>), 4.55 (d, 1H, CH<sub>2</sub>,  $J_{H-H}$  = 7.7 Hz), 4.82 (d, 1H, CH<sub>2</sub>=,  $J_{H-H}$  = 16.9 Hz), 5.19 (d, 1H, CH<sub>2</sub>=,  $J_{H-H}$  = 10.0 Hz), 5.39 (d, 1H, CH<sub>2</sub>,  $J_{H-H}$  = 7.7 Hz), 5.92 (s, 1H, CH), 6.48 (dd, 1H, CH=,  $J_{H-H}$  = 16.9,  $J_{H-H}$  = 10.0 Hz), 6.77 (d, 2H, CH=,  $J_{H-H}$  = 8.7 Hz), 6.94 (d, 2H, CH=,  $J_{H-H}$  = 8.3 Hz), 7.05 (d, 2H, CH=,  $J_{H-H}$  = 8.3 Hz), 7.28 (d, 2H, CH=,  $J_{H-H}$  = 8.7 Hz). <sup>13</sup>C {<sup>1</sup>H} NMR (100.6 MHz, CDCl<sub>3</sub>),  $\delta$ : 21.0, 27.9, 30.2, 55.2, 64.7, 68.3, 76.4, 86.9, 105.4, 113.9, 115.2, 127.0, 127.6, 129.0 (2C), 129.2 (2C), 135.2, 137.5, 141.1, 160.2, 162.8, 165.5. HRMS (ESI-TOF)  $m/z$ : [M + Na]<sup>+</sup> Calcd for C<sub>25</sub>H<sub>26</sub>O<sub>6</sub>Na 445.1622; Found 445.1625.

**1-(4-Methoxyphenyl)-8,8-dimethyl-4-(4-(trifluoro-methyl)phenyl)-4-vinyl-2,7,9-trioxaspiro[4.5]decane-6,10-dione (3ad).** The title compound was isolated through

## Supporting Information

column chromatography (SiO<sub>2</sub>, petroleum ether/ethyl acetate 4:1) as a white solid (117.9 mg, 99%). Enantiomeric excess determined by HPLC using Chiralcel IA column (hexane/2-propanol=98/2, 1 mL/min, 220 nm). *t<sub>R</sub>* 31.5 min (*S,R*); *t<sub>R</sub>* 41.1 min (*R,S*). <sup>1</sup>H NMR (400 MHz, CDCl<sub>3</sub>), δ: 0.77 (s, 3H, CH<sub>3</sub>), 1.45 (s, 3H, CH<sub>3</sub>), 3.71 (s, 3H, CH<sub>3</sub>), 4.60 (d, 1H, CH<sub>2</sub>, *J<sub>H-H</sub>* = 8.2 Hz), 4.74 (d, 1H, CH<sub>2</sub>=, *J<sub>H-H</sub>* = 17.0 Hz), 5.23 (d, 1H, CH<sub>2</sub>=, *J<sub>H-H</sub>* = 11.1 Hz), 5.41 (d, 1H, CH<sub>2</sub>, *J<sub>H-H</sub>* = 8.2 Hz), 5.93 (s, 1H), 6.48 (dd, CH=, *J<sub>H-H</sub>* = 17.0 Hz, *J<sub>H-H</sub>* = 11.1 Hz), 6.78 (d, 2H, CH=, *J<sub>H-H</sub>* = 8.7 Hz), 7.19 (d, 2H, CH=, *J<sub>H-H</sub>* = 8.7 Hz), 7.28 (d, 2H, CH=, *J<sub>H-H</sub>* = 8.7 Hz), 7.52 (d, 2H, CH=, *J<sub>H-H</sub>* = 7.4 Hz). <sup>13</sup>C NMR (100.6 MHz, CDCl<sub>3</sub>), δ: 28.1, 30.0, 55.3, 64.8, 67.9, 76.4, 87.2, 105.7, 114.0, 116.0, 125.6, 126.9, 127.6, 129.1, 140.4, 142.6, 160.4, 162.7, 165.2. <sup>19</sup>F {<sup>1</sup>H} NMR (376 MHz, CDCl<sub>3</sub>), δ: -62.7. HRMS (ESI-TOF) *m/z*: [M + Na]<sup>+</sup> Calcd for C<sub>25</sub>H<sub>23</sub>F<sub>3</sub>O<sub>6</sub>Na 499.1339; Found 499.1344.

**8,8-Dimethyl-4-(*p*-tolyl)-1-(4-(trifluoromethyl)phenyl)-4-vinyl-2,7,9-trioxaspiro[4.5]decane-6,10-dione (3bb).** The title compound was isolated through column chromatography (SiO<sub>2</sub>, petroleum ether/ethyl acetate 10:1) as a white solid (104.7 mg, 91%). Enantiomeric excess determined by HPLC using Chiralcel AD column (hexane/2-propanol=98/2, 1 mL/min, 220 nm). *t<sub>R</sub>* 8.3 min (*S,R*); *t<sub>R</sub>* 12.5 min (*R,S*). <sup>1</sup>H NMR (400 MHz, CDCl<sub>3</sub>), δ: 0.84 (s, 3H, CH<sub>3</sub>), 1.39 (s, 3H, CH<sub>3</sub>), 2.25 (s, 3H, CH<sub>3</sub>), 4.58 (d, 1H, CH<sub>2</sub>, *J<sub>H-H</sub>* = 8.1 Hz), 4.94 (d, 1H, CH<sub>2</sub>=, *J<sub>H-H</sub>* = 17.9 Hz), 5.26 (d, 1H, CH<sub>2</sub>=, *J<sub>H-H</sub>* = 11.3 Hz), 5.43 (d, 1H, CH<sub>2</sub>, *J<sub>H-H</sub>* = 8.1 Hz), 6.05 (s, 1H, CH), 6.57 (dd, 1H, CH=, *J<sub>H-H</sub>* = 17.9, *J<sub>H-H</sub>* = 11.3 Hz), 6.97 (d, 2H, CH=, *J<sub>H-H</sub>* = 8.3 Hz), 7.07 (d, 2H, CH=, *J<sub>H-H</sub>* = 8.3 Hz), 7.51 (s, 4H, CH=). <sup>13</sup>C NMR (100.6 MHz, CDCl<sub>3</sub>), δ: 21.0, 27.7, 30.6, 64.4, 68.3, 76.2, 85.9, 105.9, 115.9, 122.5, 125.4, 127.2, 128.0, 129.2, 131.0, 131.1, 134.1, 138.0, 140.2, 140.3, 162.4, 165.2. <sup>19</sup>F {<sup>1</sup>H} NMR (376 MHz, CDCl<sub>3</sub>), δ: -62.8 HRMS (ESI-TOF) *m/z*: [M + Na]<sup>+</sup> Calcd for C<sub>25</sub>H<sub>23</sub>F<sub>3</sub>O<sub>5</sub>Na 483.1390; Found 483.1394.

**4-(4-Fluorophenyl)-8,8-dimethyl-1-(4-(trifluoro-methyl)phenyl)-4-vinyl-2,7,9-trioxaspiro[4.5]decane-6,10-dione (3bc).** The title compound was isolated through column chromatography (SiO<sub>2</sub>, petroleum ether/ethyl acetate 10:1) as a white solid (102.1 mg, 88%). Enantiomeric excess determined by HPLC using Chiralcel AD column (hexane/2-propanol=98/2, 1 mL/min, 220 nm). *t<sub>R</sub>* 12.6 min (*R,S*); *t<sub>R</sub>* 15.1 min (*S,R*). <sup>1</sup>H NMR (400 MHz, CDCl<sub>3</sub>), δ: 0.84 (s, 3H, CH<sub>3</sub>), 1.38 (s, 3H, CH<sub>3</sub>), 4.56 (d, 1H, CH<sub>2</sub>, *J<sub>H-H</sub>* = 8.5 Hz), 4.90 (d, 1H, CH<sub>2</sub>=, *J<sub>H-H</sub>* = 17.3 Hz), 5.28 (d, 1H, CH<sub>2</sub>=, *J<sub>H-H</sub>* = 10.6 Hz), 5.42 (d, 1H, CH<sub>2</sub>, *J<sub>H-H</sub>* = 8.5 Hz), 6.06 (s, 1H, CH), 6.50 (dd, CH, 1H, *J<sub>H-H</sub>* = 17.3, *J<sub>H-H</sub>* = 10.6

## Supporting Information

Hz), 6.95-7.19 (m, 4H, CH=), 7.49-7.54 (s, 4H, CH=).  $^{13}\text{C}$  NMR (100.6 MHz,  $\text{CDCl}_3$ ),  $\delta$ : 27.7, 30.5, 64.4, 68.4, 76.4, 85.9, 105.8, 115.5, 115.7, 116.5, 125.4, 128.0, 129.2, 129.3, 131.1, 131.6, 132.9, 133.0, 139.8, 140.0, 162.4, 165.1.  $^{19}\text{F}\{^1\text{H}\}$  NMR (376 MHz,  $\text{CDCl}_3$ ),  $\delta$ : -113.1, -62.8. HRMS (ESI-TOF)  $m/z$ :  $[\text{M} + \text{Na}]^+$  Calcd for  $\text{C}_{24}\text{H}_{20}\text{F}_4\text{O}_5\text{Na}$  487.1139; Found 487.1145.

**4-(4-Bromophenyl)-8,8-dimethyl-1-(4-(trifluoro-methyl)phenyl)-4-vinyl-2,7,9-trioxaspiro[4.5]decane-6,10-dione (3be).** The title compound was isolated through column chromatography ( $\text{SiO}_2$ , petroleum ether/ethyl acetate 10:1) as a white solid (130.0 mg, 99%). Enantiomeric excess determined by HPLC using Chiralcel AD column (hexane/2-propanol=95/5, 1 mL/min).  $t_{\text{R}}$  8.3 min (*R,S*);  $t_{\text{R}}$  11.5 min (*S,R*).  $^1\text{H}$  NMR (400 MHz,  $\text{CDCl}_3$ ),  $\delta$ : 0.83 (s, 3H,  $\text{CH}_3$ ), 1.40 (s, 3H,  $\text{CH}_3$ ), 4.56 (d, 1H,  $\text{CH}_2$ ,  $J_{\text{H-H}} = 8.5$  Hz), 4.89 (d, 1H,  $\text{CH}_2=$ ,  $J_{\text{H-H}} = 16.9$  Hz), 5.28 (d, 1H,  $\text{CH}_2=$ ,  $J_{\text{H-H}} = 10.8$  Hz), 5.40 (d, 1H,  $\text{CH}_2$ ,  $J_{\text{H-H}} = 8.5$  Hz), 6.05 (s, 1H, CH), 6.46 (dd, 1H, CH,  $J_{\text{H-H}} = 16.9$ ,  $J_{\text{H-H}} = 10.8$  Hz), 6.97 (d, 2H, CH=,  $J_{\text{H-H}} = 8.6$  Hz), 7.40 (d, 2H, CH=,  $J_{\text{H-H}} = 8.6$  Hz), 7.48-7.54 (m, 4H, CH=).  $^{13}\text{C}\{^1\text{H}\}$  NMR (100.6 MHz,  $\text{CDCl}_3$ ),  $\delta$ : 27.8, 30.5, 64.5, 68.1, 76.3, 86.1, 105.6, 116.6, 122.43, 125.5, 128.0, 129.1, 131.2, 131.5, 131.8, 136.3, 139.6, 139.8, 139.9, 162.4, 165.0.  $^{19}\text{F}\{^1\text{H}\}$  NMR (376 MHz,  $\text{CDCl}_3$ ),  $\delta$ : -62.8. HRMS (ESI-TOF)  $m/z$ :  $[\text{M} + \text{Na}]^+$  Calcd for  $\text{C}_{24}\text{H}_{20}\text{BrF}_3\text{O}_5\text{Na}$  547.0338; Found 547.0342.

**4-(4-(Trifluoromethyl)phenyl)- 8,8-dimethyl-1-(2-bromophenyl)- 4-vinyl-2,7,9-trioxaspiro[4.5]decane-6,10-dione (3gd).** The title compound was isolated through column chromatography ( $\text{SiO}_2$ , petroleum ether/ethyl acetate 10:1) as a white solid (120 mg, 92%). Enantiomeric excess determined by HPLC using Chiralcel AD column (hexane/2-propanol=98/2, 1 mL/min).  $t_{\text{R}}$  13.1 min (*R,S*);  $t_{\text{R}}$  21.8 min (*S,R*).  $^1\text{H}$  NMR (400 MHz,  $\text{CDCl}_3$ ),  $\delta$ : 1.13 (s, 3H), 1.56 (s, 3H), 4.61 (d, 1H,  $J_{\text{H-H}} = 7.9$  Hz), 4.68 (d, 1H,  $J_{\text{H-H}} = 17.1$  Hz), 5.29 (d, 1H,  $J_{\text{H-H}} = 10.7$  Hz), 5.55 (d, 1H,  $J_{\text{H-H}} = 7.9$  Hz), 6.47 (s, 1H), 6.73 (dd, 1H,  $J_{\text{H-H}} = 17.1$  Hz,  $J_{\text{H-H}} = 10.7$  Hz), 7.17 (td, 1H,  $J_{\text{H-H}} = 7.8$  Hz,  $J_{\text{H-H}} = 1.7$  Hz), 7.27 (d, 2H,  $J_{\text{H-H}} = 8.3$  Hz), 7.35 (m, 1H), 7.49 (dd, 1H,  $J_{\text{H-H}} = 8.0$  Hz,  $J_{\text{H-H}} = 1.2$  Hz), 7.60 (d, 1H,  $J_{\text{H-H}} = 8.3$  Hz), 7.72 (dd, 1H,  $J_{\text{H-H}} = 8.0$  Hz,  $J_{\text{H-H}} = 1.2$  Hz).  $^{13}\text{C}\{^1\text{H}\}$  NMR (100.6 MHz,  $\text{CDCl}_3$ ),  $\delta$ : 28.7, 29.8, 66.2, 66.9, 77.5, 85.6, 105.6, 116.0, 122.6, 125.5 (q,  $J_{\text{C-F}} = 32.0$  Hz), 127.9, 127.9, 130.2 (q,  $J_{\text{C-F}} = 32.0$  Hz), 130.6, 131.8, 132.6, 135.7, 140.6, 142.1, 162.7, 164.1.  $^{19}\text{F}\{^1\text{H}\}$  NMR (376 MHz,  $\text{CDCl}_3$ ),  $\delta$ : -62.7. HRMS (ESI-TOF)  $m/z$ :  $[\text{M} + \text{Na}]^+$  Calcd for  $\text{C}_{24}\text{H}_{20}\text{BrF}_3\text{O}_5\text{Na}$  547.0338; Found 547.0339.

## Supporting Information

**4-(3-Bromophenyl)-8,8-dimethyl-1-(2-bromophenyl)-4-vinyl-2,7,9-trioxaspiro[4.5]decane-6,10-dione (3gf).** The title compound was isolated through column chromatography (SiO<sub>2</sub>, petroleum ether/ethyl acetate 10:1) as a white solid (101 mg, 76%). Enantiomeric excess determined by HPLC using Chiralcel OX column (hexane/2-propanol=98/2, 1 mL/min). *t<sub>R</sub>* 13.6 min (*R,S*); *t<sub>R</sub>* 15.9 min (*S,R*). <sup>1</sup>H NMR (400 MHz, CDCl<sub>3</sub>), δ: 1.06 (s, 3H), 1.61 (s, 3H), 4.57 (d, 1H, *J*<sub>H-H</sub>= 7.9 Hz), 4.71 (d, 1H, *J*<sub>H-H</sub>= 17.0 Hz), 5.28 (d, 1H, *J*<sub>H-H</sub>= 10.6 Hz), 5.51 (d, 1H, *J*<sub>H-H</sub>= 7.9 Hz), 6.45 (s, 1H), 6.69 (dd, 1H, *J*<sub>H-H</sub>= 17.0 Hz, *J*<sub>H-H</sub>= 10.6 Hz), 7.04 (m, 1H), 7.15 (m, 1H), 7.22 (t, 1H, *J*<sub>H-H</sub>= 7.9 Hz), 7.29 (t, 1H, *J*<sub>H-H</sub>= 1.8 Hz), 7.35 (m, 1H), 7.43 (m, 1H), 7.48 (dd, 1H, *J*<sub>H-H</sub>= 8.0 Hz, *J*<sub>H-H</sub>= 1.7 Hz), 7.73 (dd, 1H, *J*<sub>H-H</sub>= 8.0 Hz, *J*<sub>H-H</sub>= 1.7 Hz). <sup>13</sup>C {<sup>1</sup>H} NMR (100.6 MHz, CDCl<sub>3</sub>), δ: 28.6, 30.0, 66.1, 66.8, 77.6, 85.6, 105.6, 115.7, 122.6, 122.7, 126.0, 127.8, 130.2, 130.5, 130.6, 131.2, 132.0, 132.6, 135.8, 140.2, 140.7, 162.8, 164.1. HRMS (ESI-TOF) *m/z*: [M + Na]<sup>+</sup> Calcd for C<sub>23</sub>H<sub>20</sub>Br<sub>2</sub>O<sub>5</sub>Na 556.9570; Found 556.9572.

**4-(3-Methoxyphenyl)-8,8-dimethyl-1-(4-(trifluoro-methyl)phenyl)-4-vinyl-2,7,9-trioxaspiro[4.5]decane-6,10-dione (3bg).** The title compound was isolated through column chromatography (SiO<sub>2</sub>, petroleum ether/ethyl acetate 10:1) as a white solid (109.5 mg, 92%). Enantiomeric excess determined by HPLC using Chiralcel AD column (hexane/2-propanol= 95/5, 1 mL/min, 220 nm). *t<sub>R</sub>* 11.1 min (*R,S*); *t<sub>R</sub>* 13.8 min (*S,R*). <sup>1</sup>H NMR (400 MHz, CDCl<sub>3</sub>), δ: 0.83 (s, 3H, CH<sub>3</sub>), 1.42 (s, 3H, CH<sub>3</sub>), 3.72 (s, 3H, CH<sub>3</sub>), 4.60 (d, 1H, CH<sub>2</sub>, *J*<sub>H-H</sub>= 7.9 Hz), 4.97 (d, 1H, CH<sub>2</sub>=, *J*<sub>H-H</sub>= 16.8 Hz), 5.27 (d, 1H, CH<sub>2</sub>=, *J*<sub>H-H</sub>= 10.9 Hz), 5.41 (d, 1H, CH<sub>2</sub>, *J*<sub>H-H</sub>= 7.0 Hz), 6.03 (s, 1H, CH), 6.45 (dd, 1H, CH=, *J*<sub>H-H</sub>= 16.8, *J*<sub>H-H</sub>= 10.9 Hz), 6.64-7.77 (m, 3H, CH=), 7.17-7.21 (m, 1H, CH=), 7.49-7.54 (m, 4H, CH=). <sup>13</sup>C NMR (100.6 MHz, CDCl<sub>3</sub>), δ: 27.6, 30.5, 55.2, 64.7, 68.1, 76.9, 86.1, 105.8, 112.2, 114.6, 116.1, 119.5, 125.4, 128.0, 129.7, 131.1, 131.4, 138.9, 139.9, 140.1, 159.5, 162.3, 165.1. <sup>19</sup>F {<sup>1</sup>H} NMR (376 MHz, CDCl<sub>3</sub>), δ: -62.8. HRMS (ESI-TOF) *m/z*: [M + Na]<sup>+</sup> Calcd for C<sub>25</sub>H<sub>23</sub>F<sub>3</sub>O<sub>6</sub>Na 499.1339; Found 499.1342.

**1-(4-Methoxyphenyl)-8,8-dimethyl-4-(naphthalen-2-yl)-4-vinyl-2,7,9-trioxaspiro[4.5]decane-6,10-dione (3ah).** The title compound was isolated through column chromatography (SiO<sub>2</sub>, petroleum ether/ethyl acetate 4:1) as a white solid (108.8 mg, 95%). Enantiomeric excess determined by HPLC using Chiralcel OJ-H column (hexane/2-propanol=95/5, 1 mL/min). *t<sub>R</sub>* 29.6 min (*R,S*); *t<sub>R</sub>* 37.6 min (*S,R*). <sup>1</sup>H NMR (400 MHz, CDCl<sub>3</sub>), δ: 0.88 (s, 3H, CH<sub>3</sub>), 1.54 (s, 3H, CH<sub>3</sub>), 3.80 (s, 3H, CH<sub>3</sub>), 4.77 (d, 1H, CH<sub>2</sub>, *J*<sub>H-H</sub>= 8.1 Hz), 4.89 (d, 1H, CH<sub>2</sub>=, *J*<sub>H-H</sub>= 16.7 Hz), 5.32 (d, 1H, CH<sub>2</sub>=, *J*<sub>H-H</sub>= 10.4

## Supporting Information

Hz), 5.67 (d, 1H, CH<sub>2</sub>,  $J_{H-H}$  = 8.1 Hz), 6.09 (s, 1H, CH), 6.69 (dd, 1H, CH=,  $J_{H-H}$  = 16.7,  $J_{H-H}$  = 10.4 Hz), 6.87 (d, 2H, CH=,  $J_{H-H}$  = 9.1 Hz), 7.25-7.27 (m, 1H, CH=), 7.40 (d, 2H, CH=,  $J_{H-H}$  = 8.3 Hz), 7.50-7.53 (m, 2H, CH=), 7.63 (s, 1H, CH=), 7.79-7.85 (m, 3H, CH=). <sup>13</sup>C{<sup>1</sup>H} NMR (100.6 MHz, CDCl<sub>3</sub>),  $\delta$ : 28.0, 30.2, 55.3, 65.1, 68.2, 77.2, 87.1, 105.6, 114.0, 115.6, 125.1, 126.2, 126.5, 126.6, 127.5, 127.9, 128.3, 129.1, 132.5, 133.0, 135.6, 140.9, 160.3, 162.7, 165.6. HRMS (ESI-TOF)  $m/z$ : [M + Na]<sup>+</sup> Calcd for C<sub>28</sub>H<sub>26</sub>O<sub>6</sub>Na 481.1622; Found 481.1628.

**8,8-Dimethyl-4-(naphthalen-2-yl)-1-(4-(trifluoromethyl)phenyl)-4-vinyl-2,7,9-trioxaspiro[4.5]decane-6,10-dione (3bh)**. The title compound was isolated through column chromatography (SiO<sub>2</sub>, petroleum ether/ethyl acetate 10:1) as a white solid (122.8 mg, 99%). Enantiomeric excess determined by HPLC using Chiralcel AD column (hexane/2-propanol=95/5, 1 mL, min, 220 nm).  $t_R$  10.8 min (*R,S*);  $t_R$  14.7 min (*S,R*). <sup>1</sup>H NMR (400 MHz, CDCl<sub>3</sub>),  $\delta$ : 0.84 (s, 3H, CH<sub>3</sub>), 1.39 (s, 3H, CH<sub>3</sub>), 4.70 (d, 1H, CH<sub>2</sub>,  $J_{H-H}$  = 8.1 Hz), 4.93 (d, 1H, CH<sub>2</sub>=,  $J_{H-H}$  = 16.8 Hz), 5.29 (d, 1H, CH<sub>2</sub>=,  $J_{H-H}$  = 10.7 Hz), 5.61 (d, 1H, CH<sub>2</sub>,  $J_{H-H}$  = 8.1 Hz), 6.12 (s, 1H, CH), 6.60 (dd, 1H, CH=,  $J_{H-H}$  = 16.8,  $J_{H-H}$  = 10.7 Hz), 7.19-7.22 (m, 1H, CH=), 7.43-7.45 (m, 2H, CH=), 7.53-7.56 (m, 5H, CH=), 7.71-7.76 (m, 3H, CH=). <sup>13</sup>C NMR (100.6 MHz, CDCl<sub>3</sub>),  $\delta$ : 27.7, 30.5, 65.1, 68.2, 76.6, 86.2, 105.8, 116.4, 125.1, 125.5, 126.5, 126.7, 127.6, 128.0, 128.3, 132.6, 132.9, 134.6, 140.1, 162.4, 165.7. <sup>19</sup>F{<sup>1</sup>H} NMR (376 MHz, CDCl<sub>3</sub>),  $\delta$ : -62.8. HRMS (ESI-TOF)  $m/z$ : [M + Na]<sup>+</sup> Calcd for C<sub>28</sub>H<sub>23</sub>F<sub>3</sub>O<sub>5</sub>Na 519.1390; Found 519.1392.

**4-(2-Methoxyphenyl)-8,8-dimethyl-1-(2-bromophenyl)-4-vinyl-2,7,9-trioxaspiro[4.5]decane-6,10-dione (3gi)**. The title compound was isolated through column chromatography (SiO<sub>2</sub>, petroleum ether/ethyl acetate 10:1) as a white solid (114 mg, 94%). Enantiomeric excess determined by HPLC using Chiralcel IA column (hexane/2-propanol=98/2, 1 mL/min).  $t_R$  23.6 min (*R,S*);  $t_R$  28.8 min (*S,R*). <sup>1</sup>H NMR (400 MHz, CDCl<sub>3</sub>),  $\delta$ : 0.92 (s, 3H), 1.56 (s, 3H), 3.72 (s, 3H), 4.66 (d, 1H,  $J_{H-H}$  = 7.8 Hz), 4.72 (d, 1H,  $J_{H-H}$  = 16.5 Hz), 5.13 (d, 1H,  $J_{H-H}$  = 10.6 Hz), 5.64 (d, 1H,  $J_{H-H}$  = 7.8 Hz), 6.40 (s, 1H), 6.77 (dd, 1H,  $J_{H-H}$  = 16.5, 10.6 Hz), 6.89 (m, 1H), 6.99 (m, 2H), 7.15 (m, 1H), 7.28 (m, 1H), 7.33 (m, 1H), 7.50 (dd, 1H,  $J_{H-H}$  = 7.8 Hz,  $J_{H-H}$  = 1.2 Hz), 7.67 (dd, 1H,  $J_{H-H}$  = 8.3 Hz,  $J_{H-H}$  = 1.2 Hz). <sup>13</sup>C{<sup>1</sup>H} NMR (100.6 MHz, CDCl<sub>3</sub>),  $\delta$ : 28.5, 29.4, 54.6, 65.5, 78.8, 86.7, 105.0, 112.2, 121.6, 123.2, 127.9, 128.6, 129.3, 130.6, 131.6, 132.7, 136.1, 140.4, 156.2, 162.7, 164.1. HRMS (ESI-TOF)  $m/z$ : [M + Na]<sup>+</sup> Calcd for C<sub>24</sub>H<sub>23</sub>BrO<sub>6</sub>Na 509.0570; Found 509.0574.

## Supporting Information

**4-((Benzyloxy)methyl)-8,8-dimethyl-1-(4-(trifluoromethyl)phenyl)-4-vinyl-2,7,9-trioxaspiro[4.5]decane-6,10-dione (3bj).** The title compound was isolated through column chromatography (SiO<sub>2</sub>, petroleum ether/ethyl acetate 4:1) as a white solid (120.1 mg, 98%). Enantiomeric excess determined by HPLC using Chiralcel IA column (hexane/2-propanol=98/2, 0.5 mL/min, 220 nm). *t<sub>R</sub>* 27.9 min (*S,S*); *t<sub>R</sub>* 31.7 min (*R,R*). <sup>1</sup>H NMR (400 MHz, CDCl<sub>3</sub>), δ: 1.21 (s, 3H, CH<sub>3</sub>), 1.27 (s, 3H, CH<sub>3</sub>), 3.56 (d, 1H, CH<sub>2</sub>, *J*<sub>H-H</sub> = 8.7 Hz), 3.82 (d, *J*<sub>H-H</sub> = 9.7 Hz, 1H), 4.04 (m, 2H, CH<sub>2</sub>), 4.24 (d, 1H, CH<sub>2</sub>, *J*<sub>H-H</sub> = 11.2 Hz), 4.33 (d, 1H, CH<sub>2</sub>, *J*<sub>H-H</sub> = 11.2 Hz), 5.34 (m, 2H, CH<sub>2</sub>), 5.74 (s, 1H), 6.11 (dd, 1H, CH=, *J*<sub>H-H</sub> = 17.5, *J*<sub>H-H</sub> = 10.5 Hz), 7.21-7.22 (m, 5H, CH=), 7.36 (d, 1H, CH=, *J*<sub>H-H</sub> = 7.8 Hz), 7.50 (d, 2H, CH=, *J*<sub>H-H</sub> = 7.8 Hz). <sup>13</sup>C NMR (100.6 MHz, CDCl<sub>3</sub>), δ: 28.3, 29.6, 60.9, 64.9, 72.3, 73.4, 74.9, 89.5, 106.0, 117.6, 122.5, 125.1, 125.2, 126.5, 128.0, 128.3, 128.5, 130.1, 130.4, 130.7, 131.1, 136.7, 136.8, 139.9, 163.4, 166.4. <sup>19</sup>F {<sup>1</sup>H} NMR (376 MHz, CDCl<sub>3</sub>), δ: -62.8. HRMS (ESI-TOF) *m/z*: [M + Na]<sup>+</sup> Calcd for C<sub>26</sub>H<sub>25</sub>F<sub>3</sub>O<sub>6</sub>Na 513.1495; Found 513.1501.

## Supporting Information

### SI-13. Synthesis and characterization details of new achiral phosphoramidite ligands **L<sub>10</sub>** and **L<sub>11</sub>**

**Synthesis of *N*-benzhydryl-*N*-methyldibenzo[d,f][1,3,2]dioxaphosphepin-6-amine (**L<sub>10</sub>**).** *N*-methyl-1,1-diphenylmethanamine (395 mg, 2 mmol), was dried azeotropically with dry toluene (3 x 5 mL), then was solved in dry CH<sub>2</sub>Cl<sub>2</sub> and cooled to 0 °C. Then triethylamine (1.39 mL, 10 mmol) and PCl<sub>3</sub> (0,23 mL, 2.6 mmol) were added dropwise in this order. The mixture was stirred during 5 hours. Then, was evaporated and dried azeotropically with toluene to remove traces of PCl<sub>3</sub>. Then it was redissolved in dry CH<sub>2</sub>Cl<sub>2</sub> and cooled to 0 °C. Freshly distilled triethylamine (1.39 mL, 10 mmol) and [1,1'-biphenyl]-2,2'-diol (0.37 g, 2 mmol) were added in this order. The mixture was stirred at room temperature overnight. The crude was directly poured into a 500 mL round bottom flask, diluted with dichloromethane, coated with SiO<sub>2</sub> and chromatographed (Hexanes/Ethyl acetate, 5:1). White solid (350 mg, 0.9 mmol, 43%). <sup>31</sup>P NMR (161.9 MHz, CDCl<sub>3</sub>) δ: 149.2. <sup>1</sup>H NMR (400 MHz, CDCl<sub>3</sub>): δ = 2.34 (d, 3H, CH<sub>3</sub>, *J*<sub>H-P</sub> = 4.7 Hz), 6.07 (d, 1H, CH, *J*<sub>H-P</sub> = 10.3 Hz), 6.85-6.98 (m, 6H, CH=), 7.04-7.14 (m, 6H, CH=), 7.18 (m, 2H, CH=), 7.26 (m, 4H, CH=). <sup>13</sup>C NMR (100.6 MHz, CDCl<sub>3</sub>): δ = 28.7, 64.6, 65.1, 121.9, 124.3, 127.1, 127.4, 127.7, 127.9, 128.2, 129.1, 129.6, 129.7, 131.1, 131.2, 140.0, 140.1, 151.8, 151.9. HRMS (ESI-TOF) *m/z*: [M + Na]<sup>+</sup> Calcd for C<sub>26</sub>H<sub>22</sub>NO<sub>2</sub>PNa 434.1280; Found 434.1278.

**Synthesis of *N*-benzhydryl-2,4,8,10-tetra-*tert*-butyl-*N*-methyldibenzo[d,f][1,3,2]-dioxaphosphepin-6-amine (**L<sub>11</sub>**).** *N*-methyl-1,1-diphenylmethanamine (395 mg, 2 mmol), was dried azeotropically with dry toluene (3 x 5 mL), then was solved in dry CH<sub>2</sub>Cl<sub>2</sub> and cooled to 0 °C. Then freshly distilled triethylamine (1.39 mL, 10 mmol) and PCl<sub>3</sub> (0,23 mL, 2.6 mmol) were added dropwise in this order. The mixture was stirred during 5 hours. Then, was evaporated and dried azeotropically with toluene to remove traces of PCl<sub>3</sub>. Then it was redissolved in dry CH<sub>2</sub>Cl<sub>2</sub> and cooled to 0 °C. Freshly distilled triethylamine (1.39 mL, 10 mmol) and 3,3',5,5'-tetra-*tert*-butyl-[1,1'-biphenyl]-2,2'-diol (0.82 g, 2 mmol) were added in this order. The mixture was stirred at room temperature overnight. The crude was directly poured into a 500 mL round bottom flask, diluted with dichloromethane, coated with SiO<sub>2</sub> and chromatographed with 100% hexanes. White solid (500 mg, 0.8 mmol, 40%). <sup>31</sup>P NMR (161.9 MHz, CDCl<sub>3</sub>) δ: 146.9. <sup>1</sup>H NMR (400 MHz, CDCl<sub>3</sub>): δ = 1.32 (s, 18H, CH<sub>3</sub>), 1.49 (b, 18H, CH<sub>3</sub>), 2.51 (b, 3H, CH<sub>3</sub>), 6.03 (b, 1H, CH), 7.07-7.20 (m, 8H, CH=), 7.21-7.35 (b, 4H, CH=), 7.59 (m, 2H, CH=). <sup>13</sup>C NMR

## Supporting Information

(100.6 MHz, CDCl<sub>3</sub>):  $\delta$  = 29.6, 30.7, 30.7, 31.3, 34.3, 35.3, 65.6, 124.0, 126.3, 127.0, 129.5, 135.0, 139.9, 140.9, 146.4, 148.0. HRMS (ESI-TOF) m/z: [M + Na]<sup>+</sup> Calcd for C<sub>42</sub>H<sub>54</sub>NO<sub>2</sub>PNa 658.3784; Found 658.3781.

## Supporting Information

### SI-14. Synthesis of post-spiroannulation products

**Synthesis of ((2*S*,4*R*)-2-(4-methoxyphenyl)-4-phenyl-4-vinyltetrahydrofuran-3,3-diyl)dimethanol (6).** A solution of LiAlH<sub>4</sub> (70 mg, 1.8 mmol) in dry THF (10 mL) was cooled to 0 °C. Then, a solution of **3aa** (65 mg, 0.18 mmol) in THF (4 mL) was also prepared. The **3aa** solution was added dropwise over the LiAlH<sub>4</sub> one. The reaction was refluxed for 48 h. Then the mixture was filtered through a celite plug and the crude was purified by column chromatography (CH<sub>2</sub>Cl<sub>2</sub>/MeOH, 95:5). Colorless oil (45 mg, 0.13 mmol, 72%). <sup>1</sup>H NMR (400 MHz, CDCl<sub>3</sub>): δ = 0.43 (m, 1H, OH), 2.60 (m, 1H, OH), 3.30 (dd, 1H, CH<sub>2</sub>, *J*<sub>H-H</sub> = 12.5 Hz, *J*<sub>H-H</sub> = 4.8 Hz), 3.37 (dd, 1H, CH<sub>2</sub>, *J*<sub>H-H</sub> = 12.5 Hz, *J*<sub>H-H</sub> = 8.4 Hz), 3.79 (s, 3H, CH<sub>3</sub>), 4.01 (dd, 1H, CH<sub>2</sub>, *J*<sub>H-H</sub> = 11.8 Hz, *J*<sub>H-H</sub> = 5.6 Hz), 4.18 (dd, 1H, CH<sub>2</sub>, *J*<sub>H-H</sub> = 11.8 Hz, *J*<sub>H-H</sub> = 6.7 Hz), 4.33 (d, 1H, CH<sub>2</sub>, *J*<sub>H-H</sub> = 8.9 Hz), 4.74 (d, 1H, CH<sub>2</sub>, *J*<sub>H-H</sub> = 8.9 Hz), 4.98 (s, 1H, CH). 4.99 (d, 1H, CH<sub>2</sub>=, *J*<sub>H-H</sub> = 17.5 Hz), 5.26 (d, 1H, CH<sub>2</sub>=, *J*<sub>H-H</sub> = 11.0 Hz), 6.63 (dd, 1H, CH=, *J*<sub>H-H</sub> = 11.0 Hz, *J*<sub>H-H</sub> = 17.5 Hz), 6.88 (d, 2H, CH=, *J*<sub>H-H</sub> = 8.7 Hz), 7.25 (m, 1H, CH=), 7.35 (m, 4H, CH=), 7.57 (m, 2H, CH=). <sup>13</sup>C NMR (100.6 MHz, CDCl<sub>3</sub>): δ = 55.4, 55.7, 57.6, 64.7, 65.3, 75.5, 85.6, 114.2, 115.3, 126.9, 128.3, 128.4, 128.5, 130.8, 141.4, 141.5, 159.5. HRMS (ESI-TOF) *m/z*: [M + Na]<sup>+</sup> Calcd for C<sub>21</sub>H<sub>24</sub>O<sub>4</sub>Na 363.1567; Found 363.1563.

**Synthesis of hydroxy-acids 7.** A solution of LiAlH<sub>4</sub> (49.5 mg, 1.30 mmol) in dry THF (8 mL) was cooled to 0 °C. Then, a solution of **3aa** (213 mg, 0.52 mmol) in THF (4 mL) was also prepared. The **3aa** solution was added dropwise over the LiAlH<sub>4</sub> one. The reaction was maintained at room temperature for 2 hours. Then the mixture was filtered through a celite plug and the crude was purified by gradient column chromatography. (Hexanes/AcOEt, 5:1 → 1:1 to CH<sub>2</sub>Cl<sub>2</sub>/EtOH 10:1). **(2*S*,3*S*,4*R*)-3-(Hydroxymethyl)-2-(4-methoxyphenyl)-4-phenyl-4-vinyltetrahydrofuran-3-carboxylic acid.** White solid (60 mg, 0.17 mmol, 32%). <sup>1</sup>H NMR (400 MHz, CDCl<sub>3</sub>): δ = 3.79 (s, 3H, CH<sub>3</sub>), 4.05 (d, 1H, CH<sub>2</sub>, *J*<sub>H-H</sub> = 12.4 Hz), 4.23 (d, 1H, CH<sub>2</sub>, *J*<sub>H-H</sub> = 12.4 Hz), 4.58 (d, 1H, CH<sub>2</sub>, *J*<sub>H-H</sub> = 7.9 Hz), 4.88 (d, 1H, CH<sub>2</sub>=, *J*<sub>H-H</sub> = 17.2 Hz), 5.03 (d, 1H, CH<sub>2</sub>, <sup>3</sup>*J*<sub>H-H</sub> = 7.9 Hz), 5.22 (s, 1H, CH), 5.24 (d, 1H, CH=, *J*<sub>H-H</sub> = 10.6 Hz), 5.51 (b, 2H, OH), 6.27 (dd, 1H, CH=, *J*<sub>H-H</sub> = 17.2 Hz, *J*<sub>H-H</sub> = 10.6 Hz), 6.76 (d, 2H, CH=, *J*<sub>H-H</sub> = 9.0 Hz), 7.24-7.32 (m, 7H, CH=). <sup>13</sup>C NMR (100.6 MHz, CDCl<sub>3</sub>): δ = 55.3, 60.6, 64.5, 64.8, 78.0, 86.8, 113.3, 115.6, 126.7, 127.4, 128.5, 128.5, 130.5, 141.5, 141.9, 159.3, 175.8. HRMS (ESI-TOF) *m/z*: [M + Na]<sup>+</sup> Calcd for C<sub>21</sub>H<sub>22</sub>O<sub>5</sub>Na 377.1359; Found 377.1348. **(2*S*,3*R*,4*R*)-3-(Hydroxymethyl)-2-(4-methoxyphenyl)-4-phenyl-4-vinyltetrahydrofuran-3-carboxylic acid.** White solid

## Supporting Information

(102 mg, 0.29 mmol, 55%).  $^1\text{H}$  NMR (400 MHz,  $\text{CDCl}_3$ ):  $\delta$  = 3.41 (s, 1H, OH), 3.75 (s, 3H,  $\text{CH}_3$ ), 4.03 (d, 1H,  $\text{CH}_2$ ,  $J_{\text{H-H}} = 12.3$  Hz), 4.22 (d, 1H,  $\text{CH}_2$ ,  $J_{\text{H-H}} = 12.3$  Hz), 4.57 (d, 1H,  $\text{CH}_2$ ,  $J_{\text{H-H}} = 7.9$  Hz), 4.87 (d, 1H,  $\text{CH}_2$ ,  $J_{\text{H-H}} = 17.2$  Hz), 5.06 (d, 1H,  $\text{CH}_2$ ,  $J_{\text{H-H}} = 7.9$  Hz), 5.23 (m, 2H, CH and  $=\text{CH}_2$ ), 5.65 (b, 1H, OH), 6.25 (dd, 1H,  $\text{CH}=\text{}$ ,  $J_{\text{H-H}} = 17.2$  Hz,  $J_{\text{H-H}} = 10.6$  Hz), 6.75 (d, 2H,  $\text{CH}=\text{}$ ,  $J_{\text{H-H}} = 8.8$  Hz), 7.24-7.31 (m, 7H,  $\text{CH}=\text{}$ ).  $^{13}\text{C}$  NMR (100.6 MHz,  $\text{CDCl}_3$ ):  $\delta$  = 55.2, 60.5, 64.5, 64.6, 77.9, 86.9, 113.2, 115.5, 126.6, 127.4, 128.4, 128.6, 130.6, 141.5, 141.9, 159.2, 175.6.

**Synthesis of (2*S*,4*R*)-2-(4-methoxyphenyl)-4-phenyl-4-vinyldihydrofuran-3,3(2*H*)-dicarboxylic acid (8).** **3aa** (80 mg, 0.20 mmol) was dissolved in 3 mL of EtOH/10% NaOH aqueous solution (2:1) and was stirred at 80 °C during 16 h. Then, 20 mL of HCl (2M) were added and the product was extracted with dichloromethane and used without further purification. White solid. (70 mg, 0.19 mmol, 97%).  $^1\text{H}$  NMR (400 MHz,  $\text{CDCl}_3$ ):  $\delta$  = 3.64 (s, 3H,  $\text{CH}_3$ ), 4.69 (d, 1H,  $\text{CH}_2$ ,  $J_{\text{H-H}} = 8.0$  Hz), 4.89 (d, 1H,  $\text{CH}_2$ ,  $J_{\text{H-H}} = 8.0$  Hz), 5.10 (d, 1H,  $\text{CH}=\text{}$ ,  $J_{\text{H-H}} = 17.1$  Hz), 5.26 (d, 1H,  $\text{CH}=\text{}$ ,  $J_{\text{H-H}} = 10.7$  Hz), 5.96 (s, 1H, CH), 6.18 (dd, 1H,  $\text{CH}=\text{}$ ,  $J_{\text{H-H}} = 17.1$  Hz,  $J_{\text{H-H}} = 10.7$  Hz), 6.74 (d, 2H,  $\text{CH}=\text{}$ ,  $J_{\text{H-H}} = 8.8$  Hz), 7.28 (m, 1H,  $\text{CH}=\text{}$ ), 7.37 (m, 2H,  $\text{CH}=\text{}$ ), 7.42 (d, 2H,  $\text{CH}=\text{}$ ,  $J_{\text{H-H}} = 8.0$  Hz).  $^{13}\text{C}$  NMR (100.6 MHz,  $\text{CDCl}_3$ ):  $\delta$  = 42.3, 55.1, 60.9, 71.0, 84.4, 113.2, 116.6, 126.7, 127.8, 128.1, 128.5, 129.2, 140.2, 140.9, 159.3, 172.0, 172.6. HRMS (ESI-TOF)  $m/z$ :  $[\text{M} + \text{Na}]^+$  Calcd for  $\text{C}_{21}\text{H}_{20}\text{O}_6\text{Na}$  391.1152; Found 391.1145.

**Synthesis of (4*R*,5*S*,8*R*)-5-(4-methoxyphenyl)-8-phenyl-8-vinyl-2,6-dioxaspiro[3.4]octan-1-one (9).** To a stirred solution of  $\text{PPh}_3$  (118 mg, 0.45 mmol) in THF (5 mL) at 0 °C, a commercial solution of diethyl azodicarboxylate (0.2 mL, 0.45 mmol) in toluene was added dropwise. Then a solution (2*S*,3*R*,4*R*)-**7** (40 mg, 0.11 mmol) in THF (1mL) was added at the same temperature and it was stirred at 0 °C for an additional hour. Then, the mixture was stirred at room temperature for 4 hours. The volatiles were evaporated under reduced pressure and the product purified by column chromatography (Hexanes/Ethyl acetate, 4:1). Colorless oil (34 mg, 0.10 mmol, 90%).  $^1\text{H}$  NMR (400 MHz,  $\text{CDCl}_3$ ):  $\delta$  = 3.80 (s, 3H,  $\text{CH}_3$ ), 4.27 (d, 1H,  $\text{CH}_2$ ,  $J_{\text{H-H}} = 6.2$  Hz), 4.64 (d, 1H,  $\text{CH}_2$ ,  $J_{\text{H-H}} = 8.6$  Hz), 4.70 (d, 1H,  $\text{CH}_2$ ,  $J_{\text{H-H}} = 6.2$  Hz), 4.89 (d, 1H,  $\text{CH}_2$ ,  $J_{\text{H-H}} = 8.6$  Hz), 5.16 (d, 1H,  $\text{CH}=\text{}$ ,  $J_{\text{H-H}} = 17.3$  Hz), 5.38 (d, 1H,  $\text{CH}=\text{}$ ,  $J_{\text{H-H}} = 10.7$  Hz), 6.14 (dd, 1H,  $\text{CH}_2$ ,  $J_{\text{H-H}} = 17.3$  Hz,  $J_{\text{H-H}} = 10.7$  Hz), 6.91 (d, 2H,  $\text{CH}=\text{}$ ,  $J_{\text{H-H}} = 8.7$  Hz), 7.28 (m, 3H,  $\text{CH}=\text{}$ ), 7.37 (m, 4H,  $\text{CH}=\text{}$ ).  $^{13}\text{C}$  NMR (100.6 MHz,  $\text{CDCl}_3$ ):  $\delta$  = 55.4, 55.6, 62.3, 74.5,

## Supporting Information

75.7, 83.8, 114.2, 117.2, 126.6, 127.9, 128.0, 128.5, 129.2, 138.5, 139.7, 160.2, 168.5. HRMS (ESI-TOF)  $m/z$ :  $[M + Na]^+$  Calcd for  $C_{21}H_{20}O_4Na$  359.1254; Found 359.1260.

**Synthesis of (1*R*,3*aR*,4*S*,6*aS*)-1-(iodomethyl)-4-(4-methoxyphenyl)-3-oxo-6*a*-phenyldihydro-1*H*,3*H*-furo[3,4-*c*]furan-3*a*(4*H*)-carboxylic acid (10).** **8** (50 mg, 0.14 mmol) and DMAP (1.7 mg, 0.014 mmol), were dissolved in dry  $CH_2Cl_2$  and cooled to 0 °C. Then NIS (37 mg, 0.16 mmol) was added, and the reaction mixture was protected from light. After two hours, the reaction mixture was quenched using 1 mL of sodium thiosulfate saturated solution. 10 mL of water were added, and the aqueous phase extracted twice with dichloromethane to obtain the pure product. Yellow solid (65 mg, 0.13 mmol, 94 %).  $^1H$  NMR (400 MHz,  $CDCl_3$ ):  $\delta$  = 2.69 (dd, 1H, CH-I,  $^2J_{H-H}$  = 11.0 Hz,  $^3J_{H-H}$  = 6.0 Hz), 2.78 (dd, 1H, CH-I,  $J_{H-H}$  = 11.0 Hz,  $J_{H-H}$  = 7.7 Hz), 3.77 (s, 3H,  $CH_3$ ), 4.90 (d, 1H,  $CH_2$ ,  $J_{H-H}$  = 8.6 Hz), 5.06 (d, 1H,  $CH_2$ ,  $J_{H-H}$  = 8.6 Hz), 5.23 (dd, 1H, CH,  $J_{H-H}$  = 7.7 Hz,  $J_{H-H}$  = 6.0 Hz), 5.68 (s, 1H, CH), 6.83 (d, 1H, CH=,  $J_{H-H}$  = 8.8 Hz), 6.96 (b, 2H, CH=), 7.24 (d, 2H,  $J_{H-H}$  = 9.0 Hz), 7.33 (m, 3H, CH=).  $^{13}C$  NMR (100.6 MHz,  $CDCl_3$ ):  $\delta$  = -1.2, 55.3, 66.5, 69.4, 76.2, 85.0, 87.2, 114.1, 126.7, 127.5, 127.6, 128.9, 129.4, 134.0, 160.2, 164.4, 174.7. HRMS (ESI-TOF)  $m/z$ :  $[M + Na]^+$  Calcd for  $C_{21}H_{19}IO_6Na$  517.0119; Found 517.0116.

**Synthesis of (1*S*,4*R*)-4-ethyl-1-(4-methoxyphenyl)-8,8-dimethyl-4-phenyl-2,7,9-trioxaspiro[4.5]decane-6,10-dione (12).** **3aa** (200 mg, 0.49 mmol) and  $[Ir(cod)(PCy_3)(Py)]BARF$  (37.3 mg, 0.025 mmol), were dissolved in dry  $CH_2Cl_2$  (20 mL).  $H_2$  gas was bubbled for 2 minutes (discoloration of the orange solution was observed) and the hydrogen atmosphere was maintained using a rubber balloon that was purged three times. Then the reaction was stirred during three hours at room temperature. The crude was evaporated and purified by flash column chromatography (Hexanes/Ethyl acetate, 5:1). White solid (191 mg, 0.47 mmol, 95%).  $^1H$  NMR (400 MHz,  $CDCl_3$ ):  $\delta$  = 0.66 (t, 3H,  $CH_3$ ,  $J_{H-H}$  = 7.2 Hz), 0.90 (s, 3H,  $CH_3$ ), 1.34 (s, 3H,  $CH_3$ ), 2.03 (m, 1H, CH), 2.39 (m, 1H, CH), 3.75 (s, 3H,  $CH_3$ ), 4.45 (d, 1H, CH,  $J_{H-H}$  = 8.2 Hz), 5.30 (dd, 1H,  $J_{H-H}$  = 8.2 Hz,  $J_{H-H}$  = 2.3 Hz), 6.04 (s, 1H, CH), 6.81 (d, 2H, CH=,  $J_{H-H}$  = 8.7 Hz), 7.13 (d, 2H, CH=,  $J_{H-H}$  = 7.0 Hz), 7.24 (d, 1H, CH=,  $J_{H-H}$  = 7.0 Hz), 7.29 (m, 2H, CH=), 7.35 (d, 2H, CH=,  $J_{H-H}$  = 8.8 Hz).  $^{13}C$  NMR (100.6 MHz,  $CDCl_3$ ):  $\delta$  = 9.6, 27.6, 30.3, 30.7, 35.3, 63.6, 69.9, 73.4, 86.2, 105.4, 113.8, 127.3, 127.8, 128.3, 128.6, 129.0, 138.4, 160.0, 163.1, 166.5. HRMS (ESI-TOF)  $m/z$ :  $[M + Na]^+$  Calcd for  $C_{24}H_{26}O_6Na$  433.1622; Found 433.1626.

## Supporting Information

**Synthesis of (*S,Z*)-4-Ethyl-3-(4-methoxybenzylidene)-4-phenyldihydrofuran-2(3H)-one (11).** Sc(OTf)<sub>3</sub> and **12** (80 mg, 0.19 mmol), were dried under vacuum during 2 hours. Then dry nitromethane (2 mL) was added, and the solution was stirred during 0.5 h at 100 °C in a pre-heated oil bath. The solvent was evaporated under reduced pressure, and directly purified by column chromatography (Hexanes/Ethyl acetate, 5:1). Yellow oil (27 mg, 0.09 mmol, 45%). <sup>1</sup>H NMR (400 MHz, CDCl<sub>3</sub>): δ = 0.99 (t, 3H, *J*<sub>H-H</sub> = 7.4 Hz, CH<sub>3</sub>), 2.10 (m, 1H, CH), 2.21 (m, 1H, CH), 3.84 (s, 3H), 4.34 (d, 1H, CH<sub>2</sub>, *J*<sub>H-H</sub> = 9.1 Hz), 4.54 (d, 1H, *J*<sub>H-H</sub> = 9.1 Hz), 6.60 (s, 1H, CH=), 6.89 (d, 1H, *J*<sub>H-H</sub> = 8.8 Hz), 7.26-7.30 (m, 1H, CH=), 7.34-7.43 (m, 4H, CH=), 7.91-7.94 (m, 2H, CH=). <sup>13</sup>C NMR (100.6 MHz, CDCl<sub>3</sub>): δ = 8.8, 31.3, 52.8, 55.4, 113.6, 126.4, 127.0, 127.1, 128.8, 129.3, 133.3, 141.5, 143.5, 161.0, 169.7. IR (ATR) ν(cm<sup>-1</sup>) = 2971, 1741 (CO), 1635, 1592, 1506, 1254, 1173, 1116, 1089, 1030, 912, 825, 787, 763, 727, 690, 643, 521. Enantiomeric excess determined by HPLC using Chiralcel OD-H column (90% hexane/2-propanol, flow 1 mL/min). *t*<sub>R</sub> 11.2 min (*R*); *t*<sub>R</sub> 12.4 min (*S*). HRMS (ESI-TOF) *m/z*: [M + Na]<sup>+</sup> Calcd for C<sub>20</sub>H<sub>20</sub>O<sub>3</sub>Na 331.1305; Found 331.1313.

## Supporting Information

### SI-15. Copies of NMR spectra of new alkylidene Meldrum's acid **11** and vinyl epoxides **2f**, **2i** and **2j**

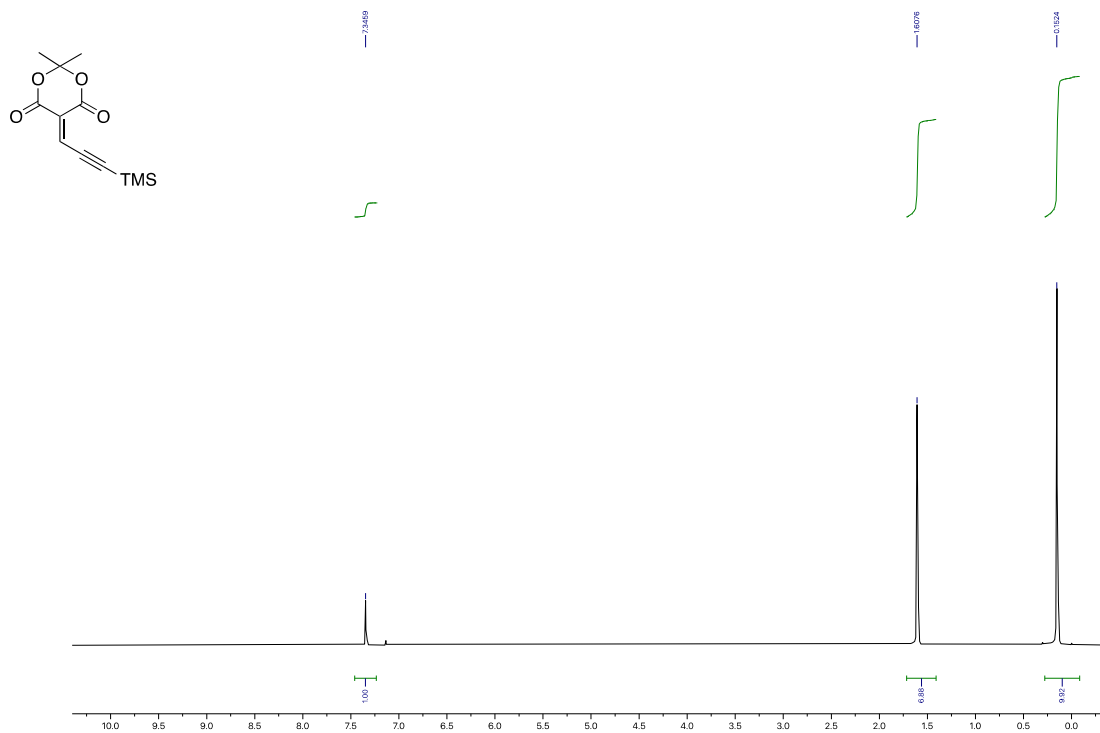

**Figure S5.** <sup>1</sup>H NMR (400 MHz) spectrum of 2,2-dimethyl-5-(3-(trimethylsilyl)prop-2-yn-1-ylidene)-1,3-dioxane-4,6-dione (**11**) in CDCl<sub>3</sub>.

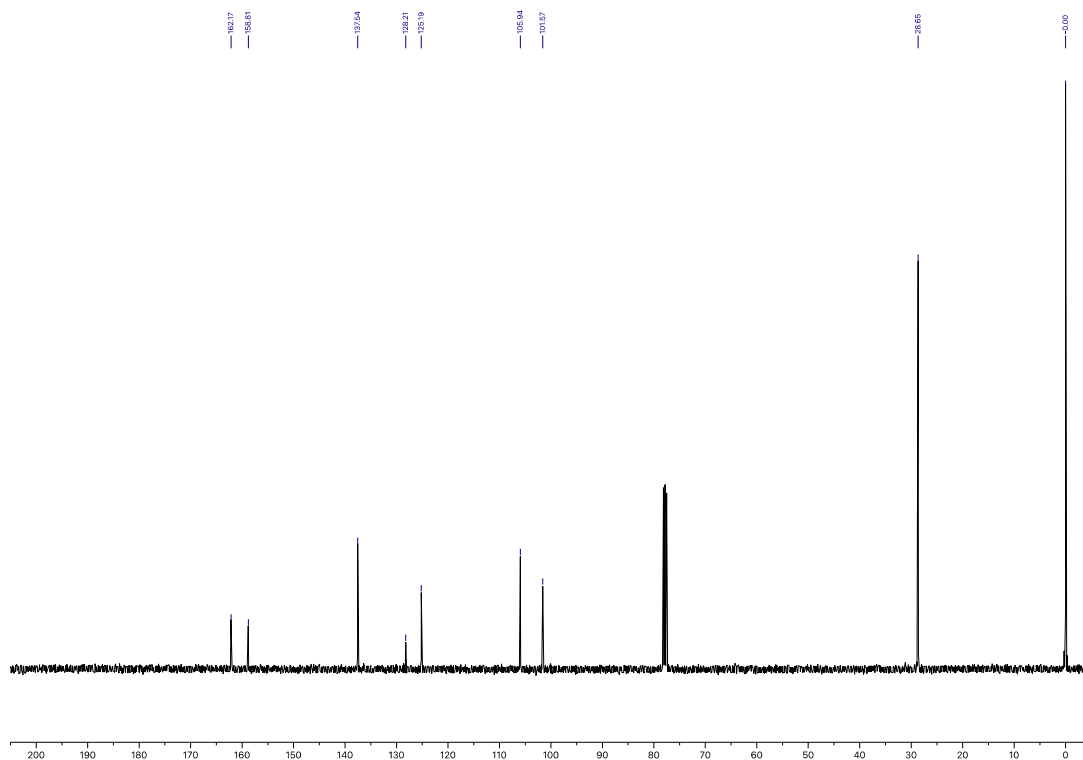

**Figure S6.** <sup>13</sup>C NMR (100.6 MHz) spectrum of **11** in CDCl<sub>3</sub>.

## Supporting Information

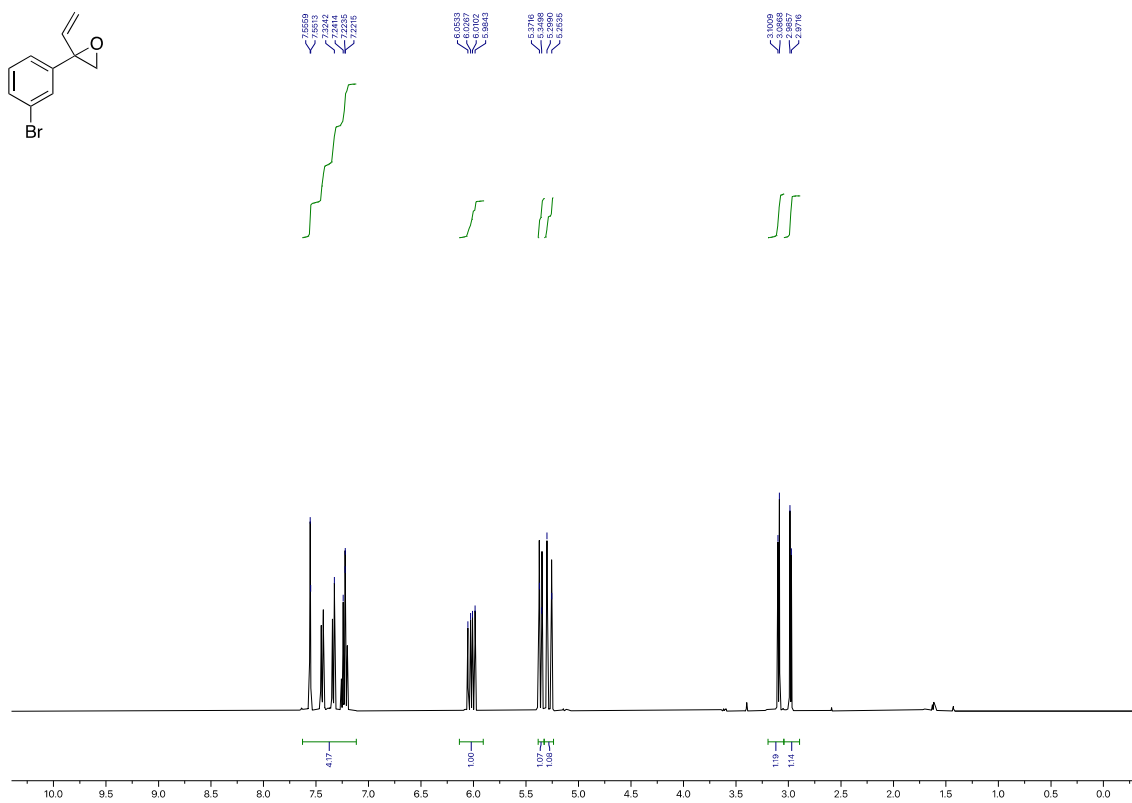

**Figure S7.** <sup>1</sup>H NMR (400 MHz) spectrum of 2-(3-bromophenyl)-2-vinyloxirane (**2f**) in CDCl<sub>3</sub>.

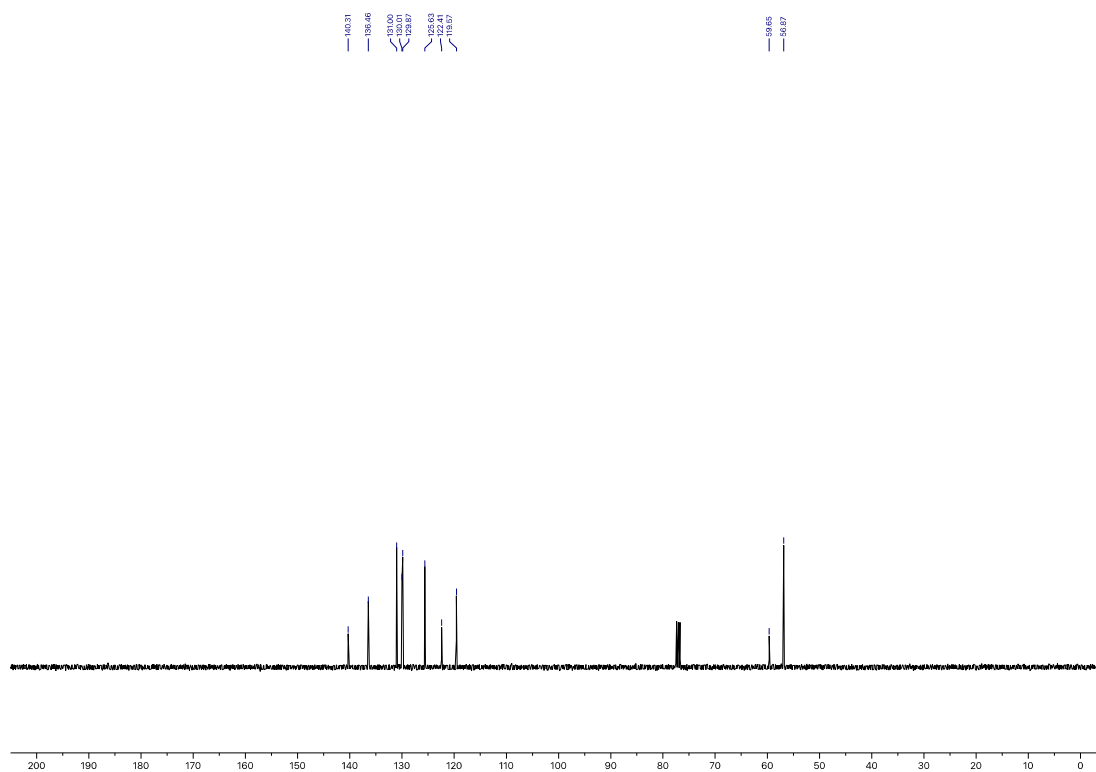

**Figure S8.** <sup>13</sup>C NMR (100.6 MHz) spectrum of **2f** in CDCl<sub>3</sub>.

## Supporting Information

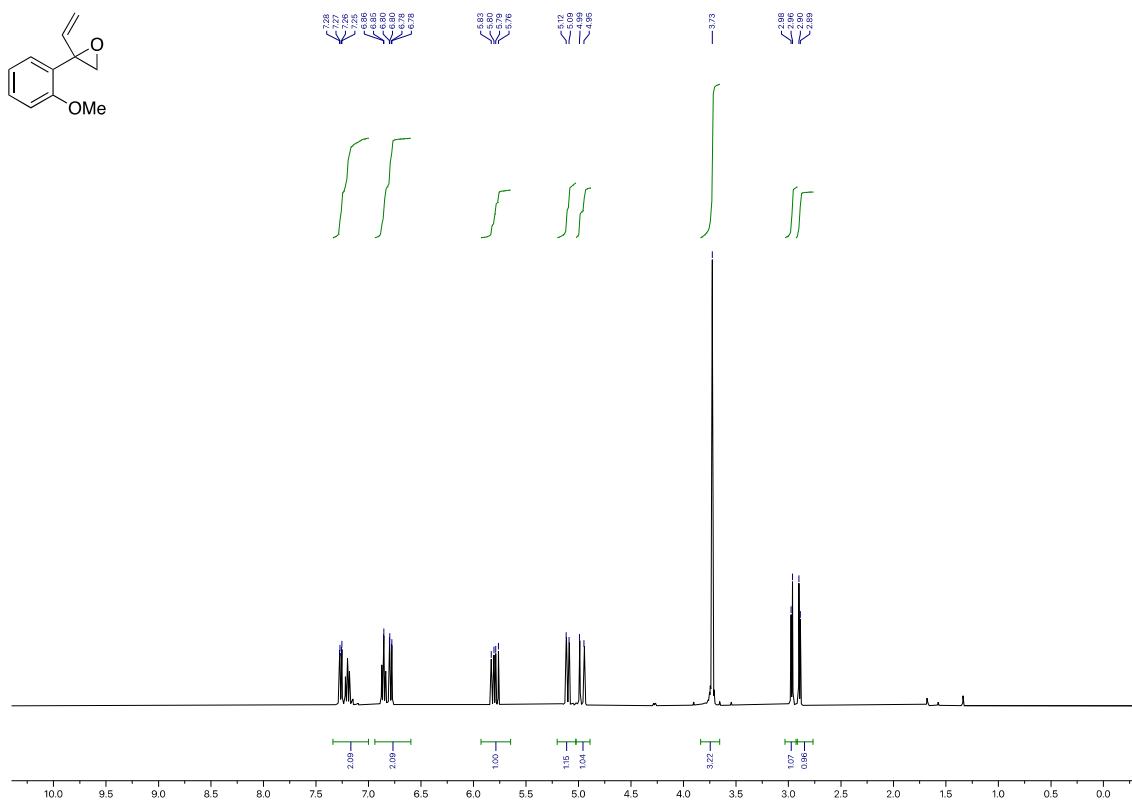

**Figure S9.** <sup>1</sup>H NMR (400 MHz) spectrum of 2-(2-methoxyphenyl)-2-vinylloxirane (**2i**) in CDCl<sub>3</sub>.

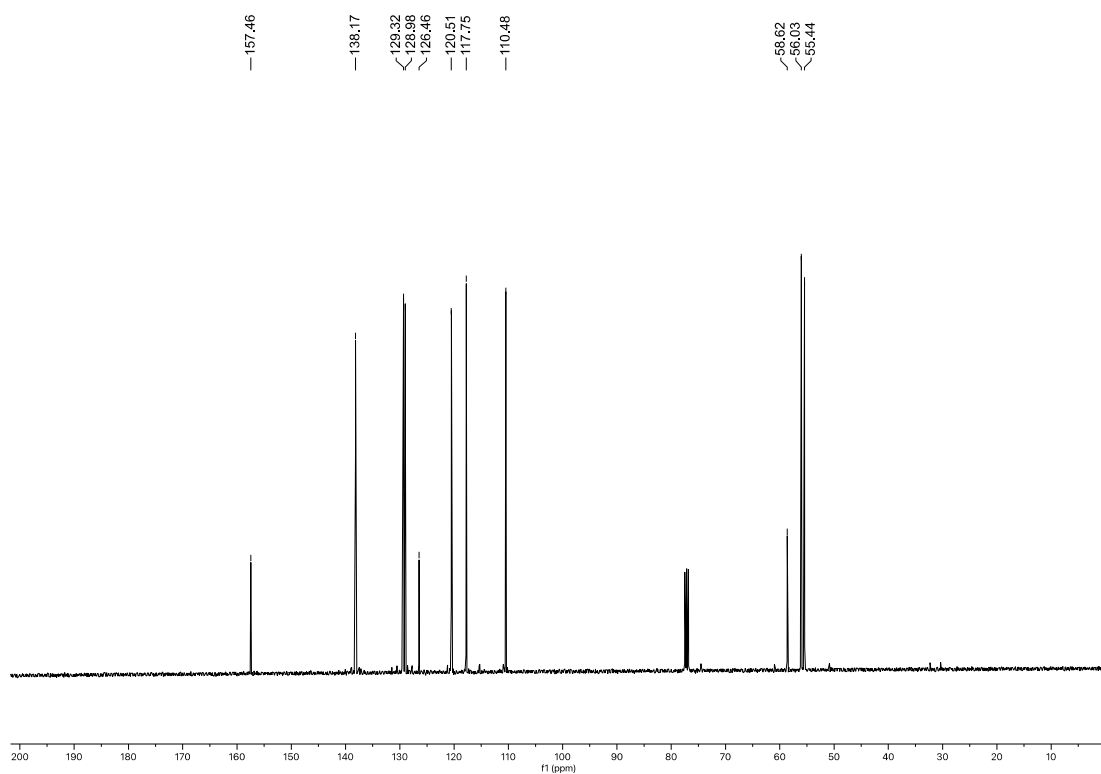

**Figure S10.** <sup>13</sup>C NMR (100.6 MHz) spectrum of **2i** in CDCl<sub>3</sub>.

## Supporting Information

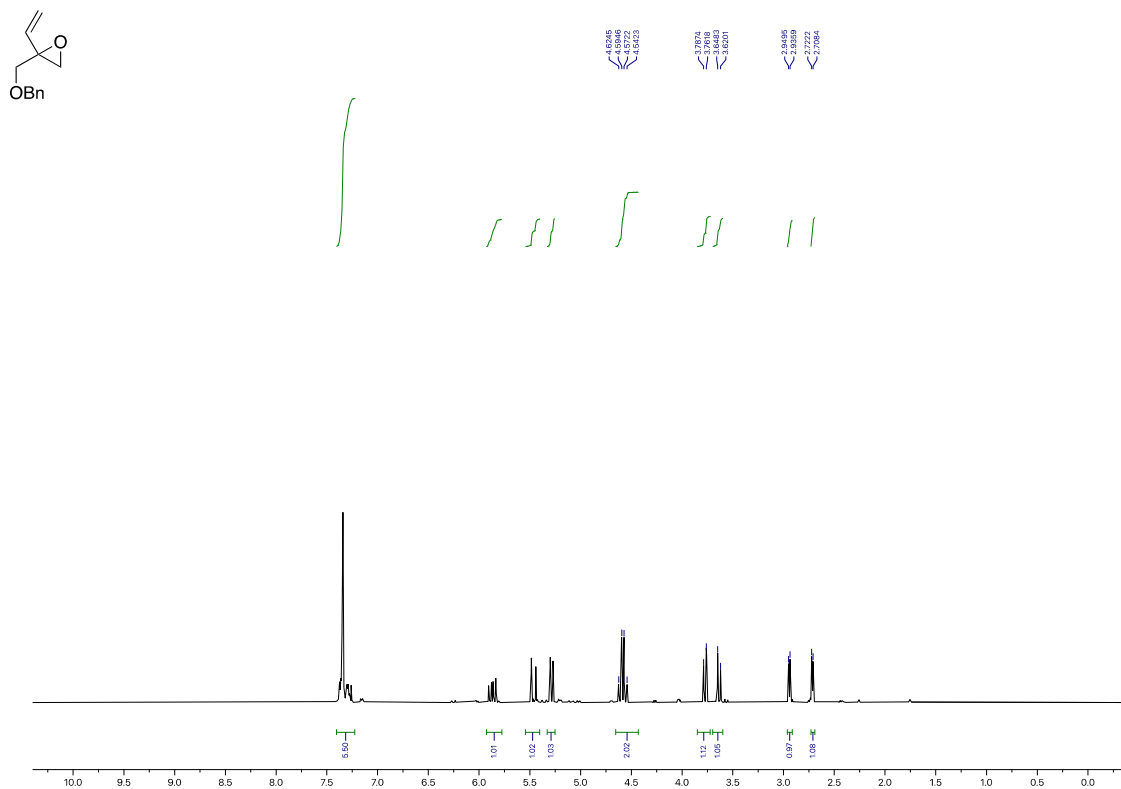

**Figure S11.** <sup>1</sup>H NMR (400 MHz) spectrum of intermediate 2-((benzyloxy)methyl)-2-vinyloxirane (**2j**) in CDCl<sub>3</sub>.

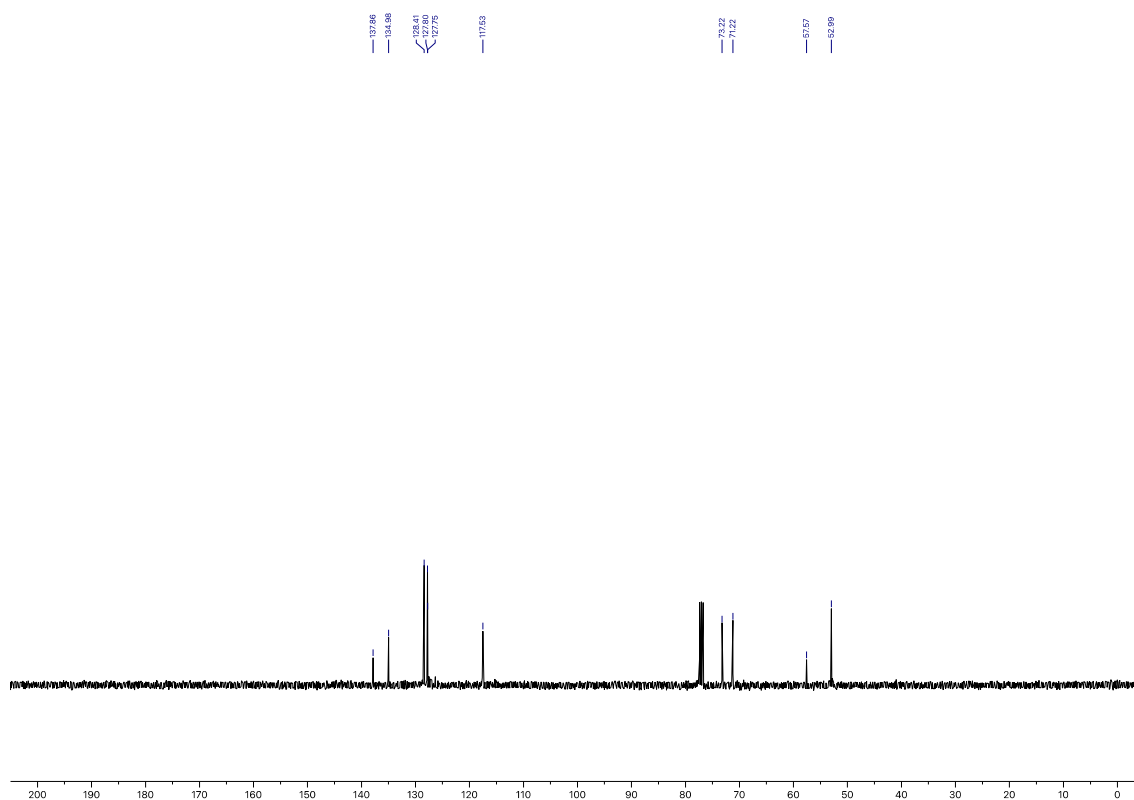

**Figure S12.** <sup>13</sup>C NMR (100.6 MHz) spectrum of **2j** in CDCl<sub>3</sub>.

## Supporting Information

### SI-16. Copies of NMR spectra and HPLC traces of [3+2]-cycloaddition products 3

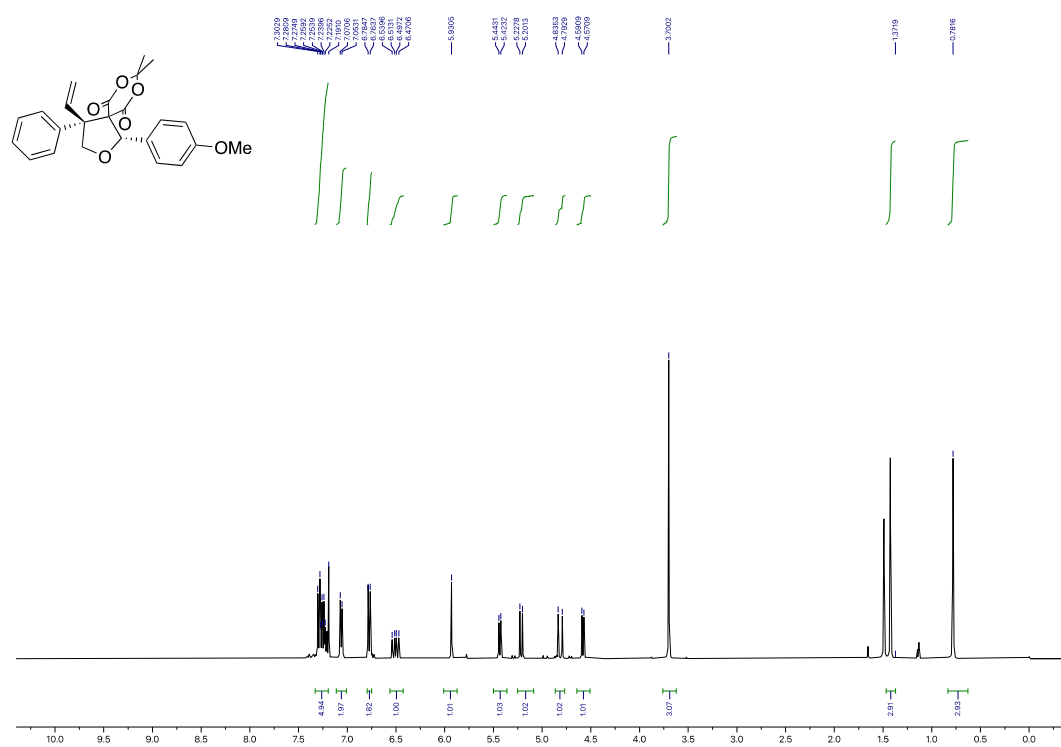

**Figure S13.** <sup>1</sup>H NMR (400 MHz) spectrum of 1-(4-methoxyphenyl)-8,8-dimethyl-4-phenyl-4-vinyl-2,7,9-trioxaspiro[4.5]decane-6,10-dione (**3aa**) in CDCl<sub>3</sub>.

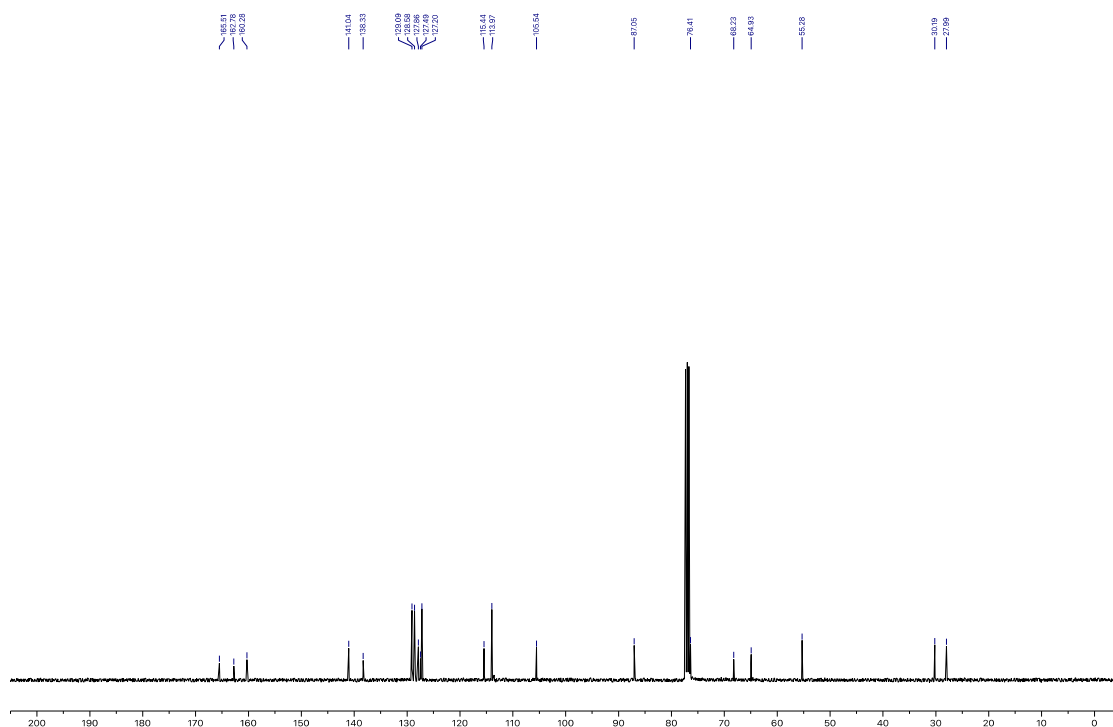

**Figure S14.** <sup>13</sup>C NMR (100.6 MHz) spectrum of **3aa** in CDCl<sub>3</sub>.

## Supporting Information

(a)

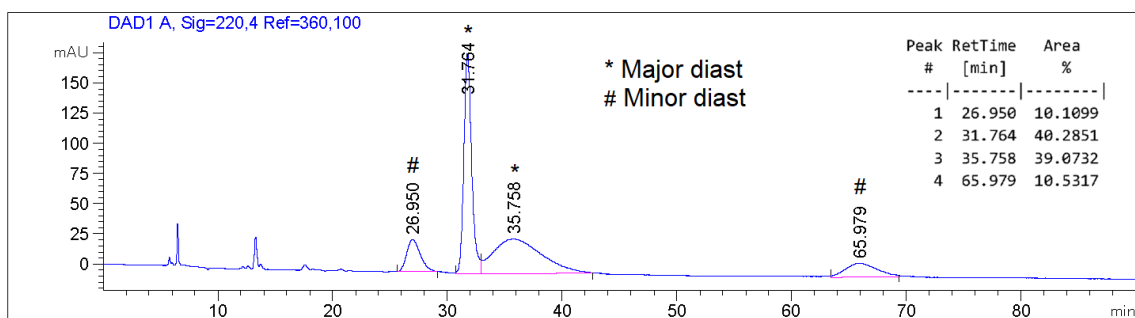

(b)

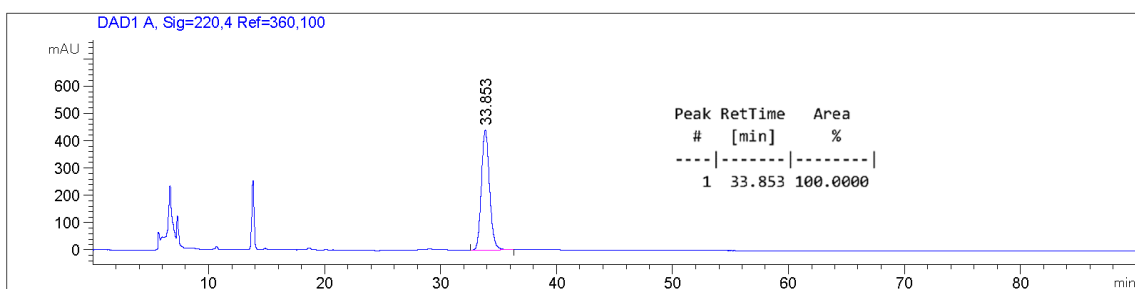

(c)

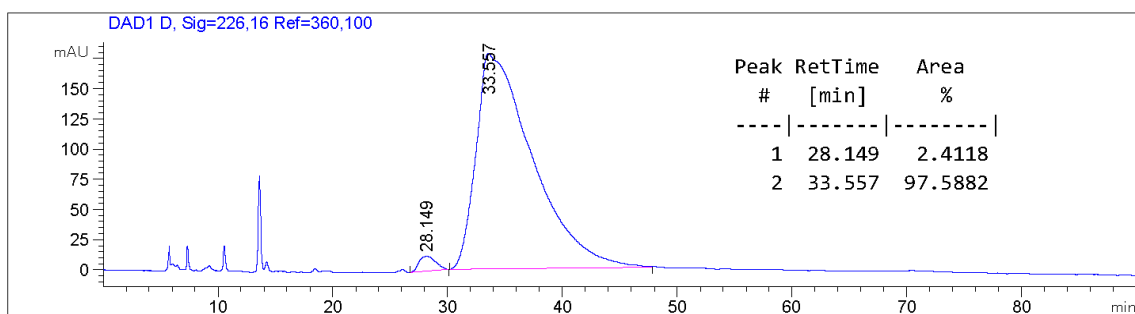

**Figure S15.** HPLC traces of (a) racemic, (b) enantioenriched product (*S,R*)-**3aa** (from Table 1; entry 14) and (c) enantioenriched product (*R,S*)-**3aa** (from Scheme 3).

## Supporting Information

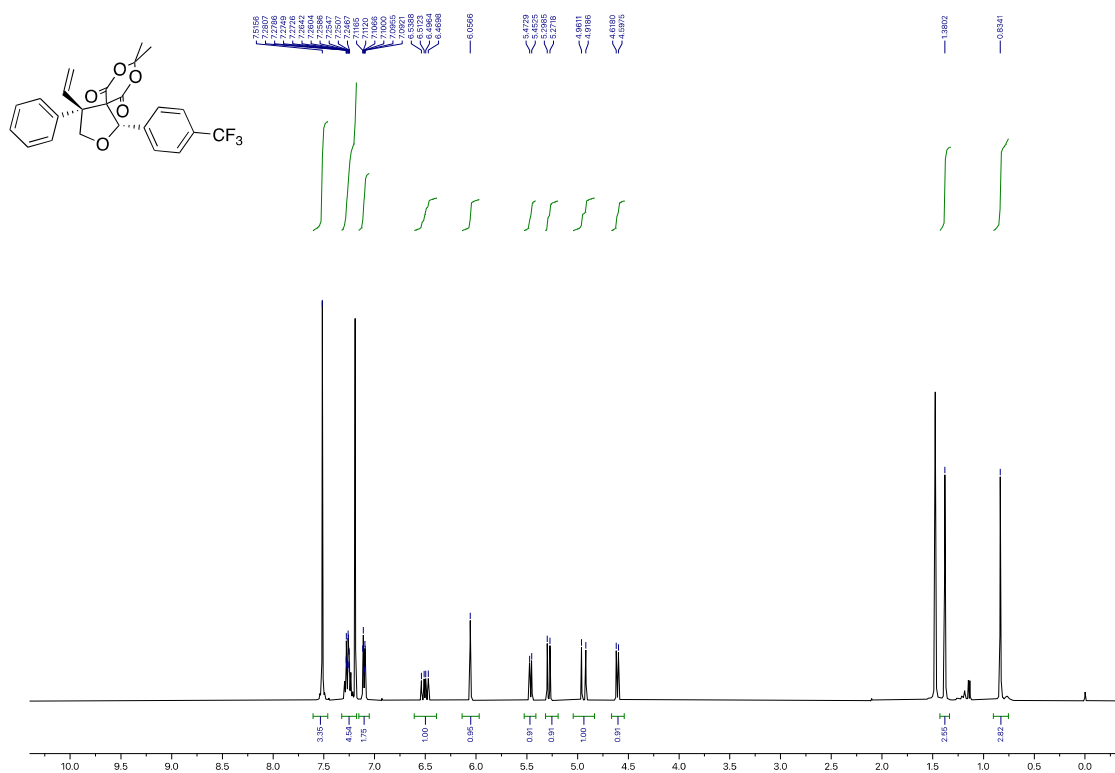

**Figure S16.** <sup>1</sup>H NMR (400 MHz) spectrum of 8,8-dimethyl-4-phenyl-1-(4-(trifluoromethyl)phenyl)-4-vinyl-2,7,9-trioxaspiro[4.5]decane-6,10-dione (**3ba**) in CDCl<sub>3</sub>.

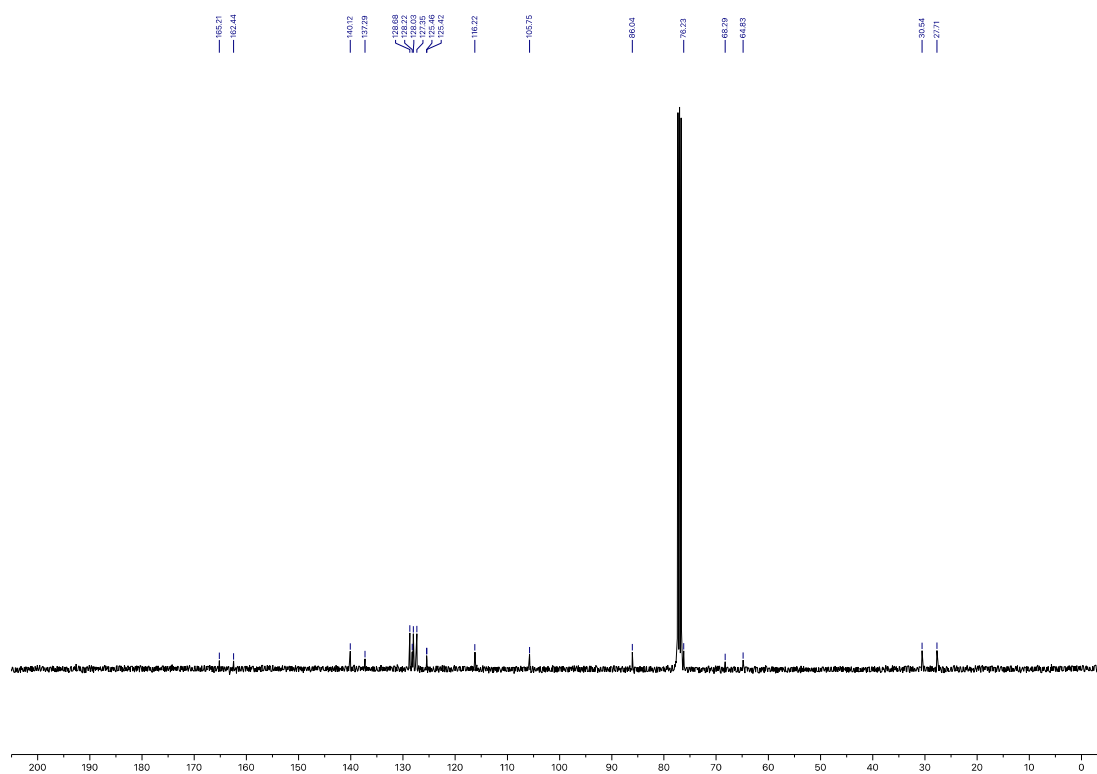

**Figure S17.** <sup>13</sup>C NMR (100.6 MHz) spectrum of **3ba** in CDCl<sub>3</sub>.

## Supporting Information

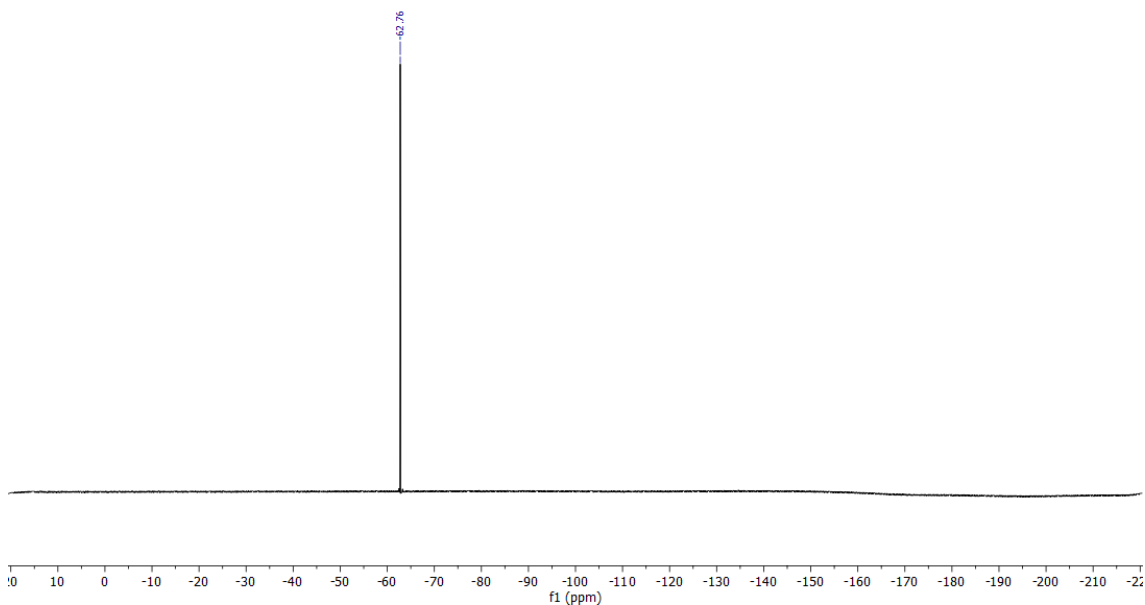

**Figure S18.**  $^{19}\text{F}$  NMR (376 MHz) spectrum of **3ba** in  $\text{CDCl}_3$ .

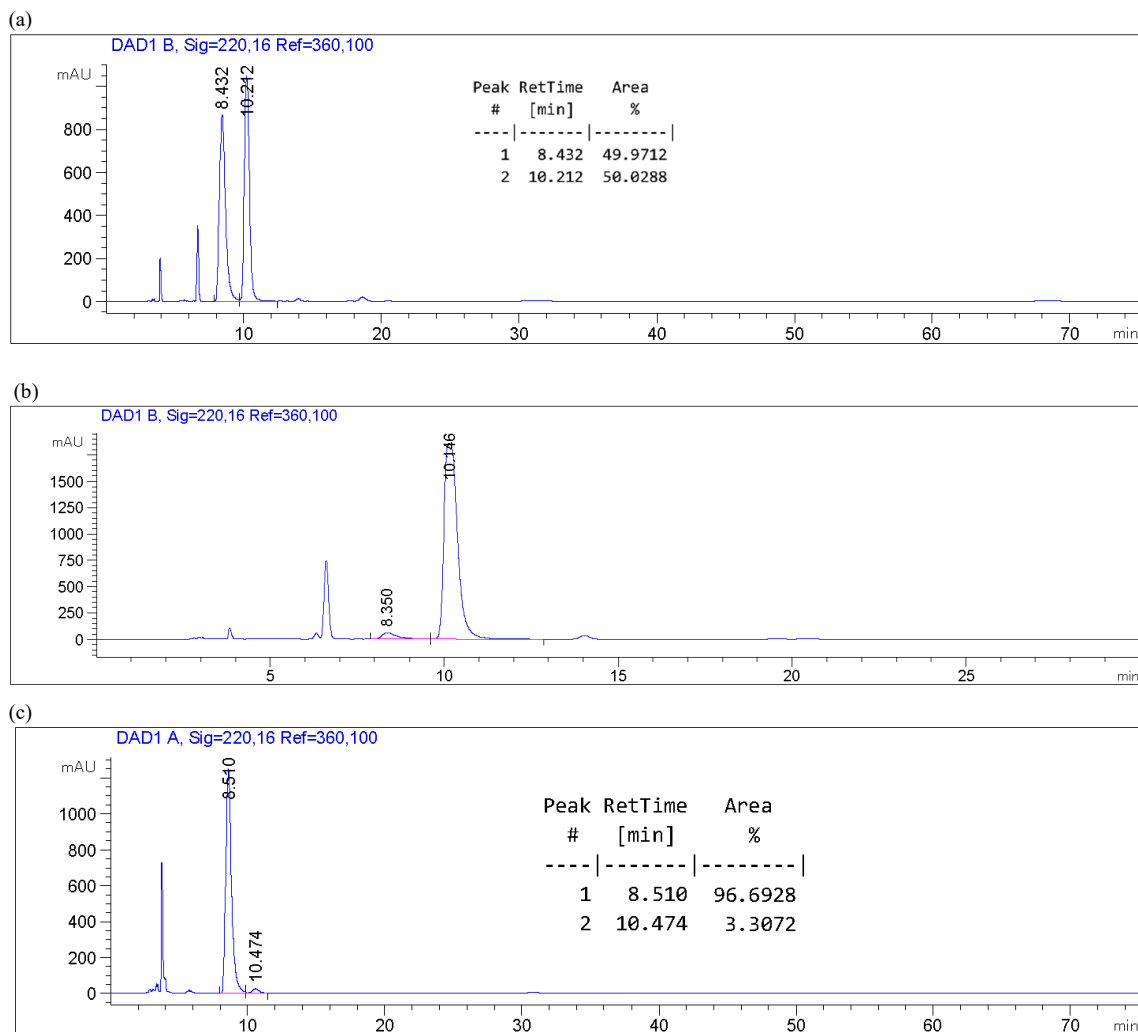

**Figure S19.** HPLC traces of (a) racemic, (b) enantioenriched product (*S,R*)-**3ba** (from kinetic experiments) and (c) enantioenriched product (*R,S*)-**3ba** (from Scheme 3).

## Supporting Information

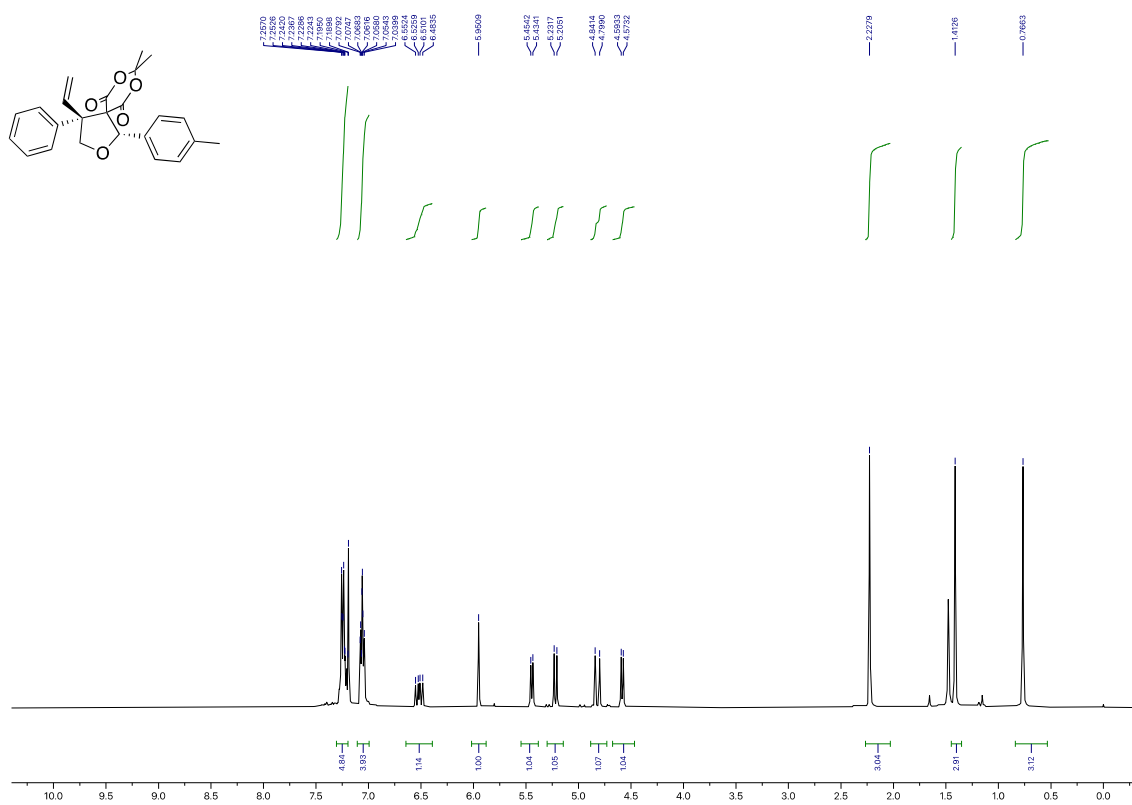

**Figure S20.** <sup>1</sup>H NMR (400 MHz) spectrum of 8,8-dimethyl-4-phenyl-1-(*p*-tolyl)-4-vinyl-2,7,9-trioxaspiro [4.5]decane-6,10-dione (**3ca**) in CDCl<sub>3</sub>.

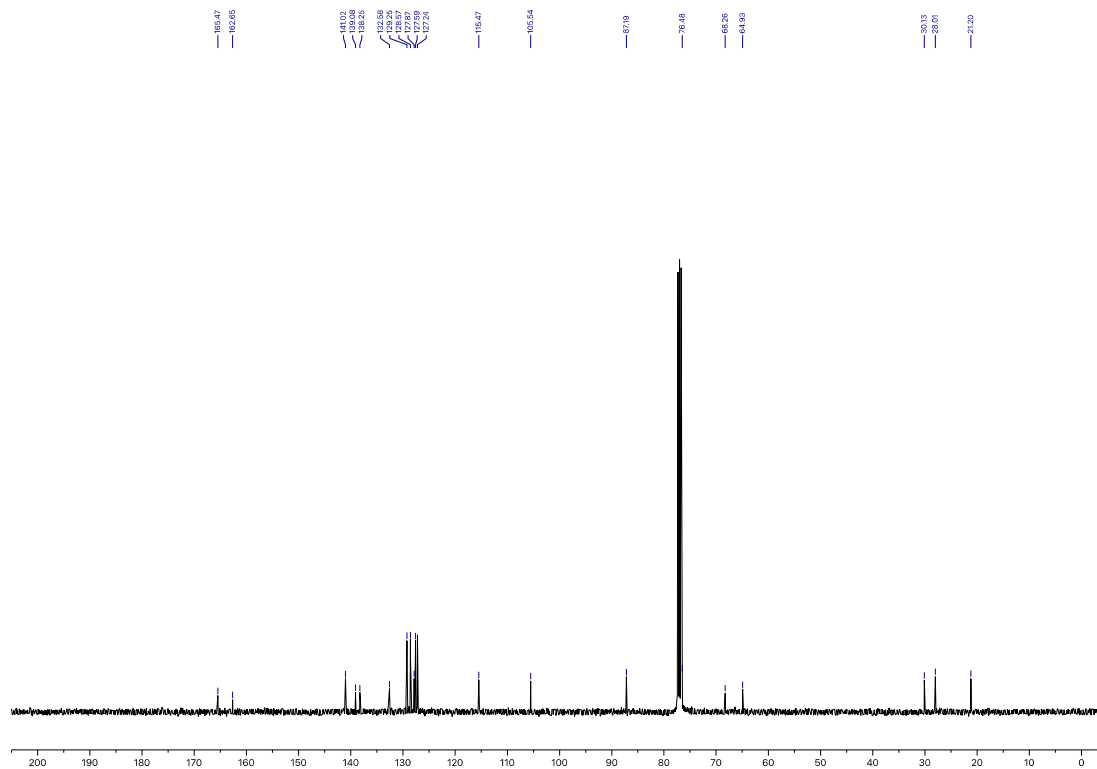

**Figure S21.** <sup>13</sup>C NMR (100.6 MHz) spectrum of **3ca** in CDCl<sub>3</sub>.

## Supporting Information

(a)

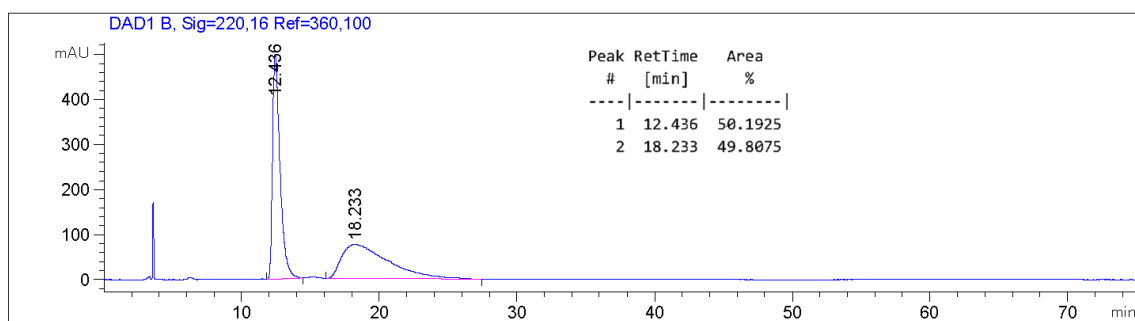

(b)

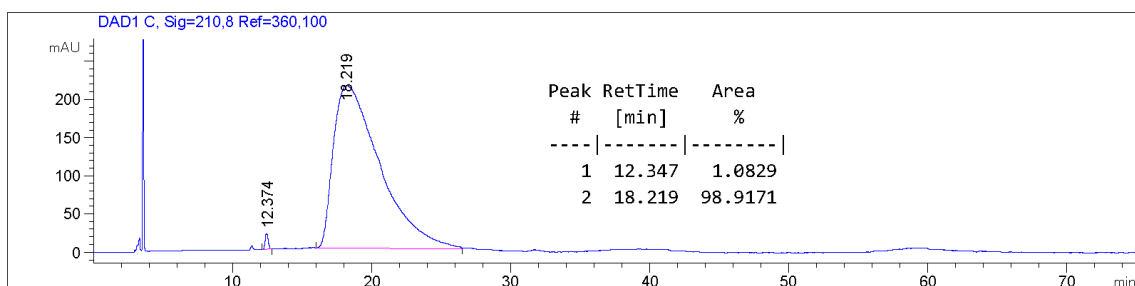

**Figure S22.** HPLC traces of (a) racemic and (b) enantioenriched product (*R,S*)-**3ca**.



## Supporting Information

(a)

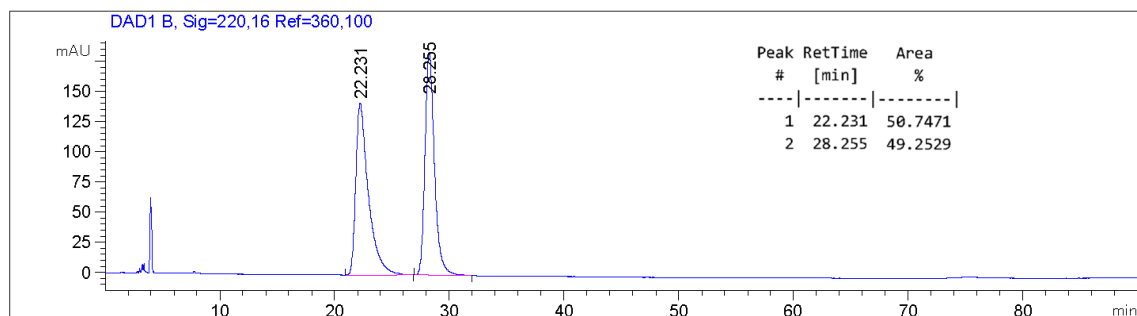

(b)

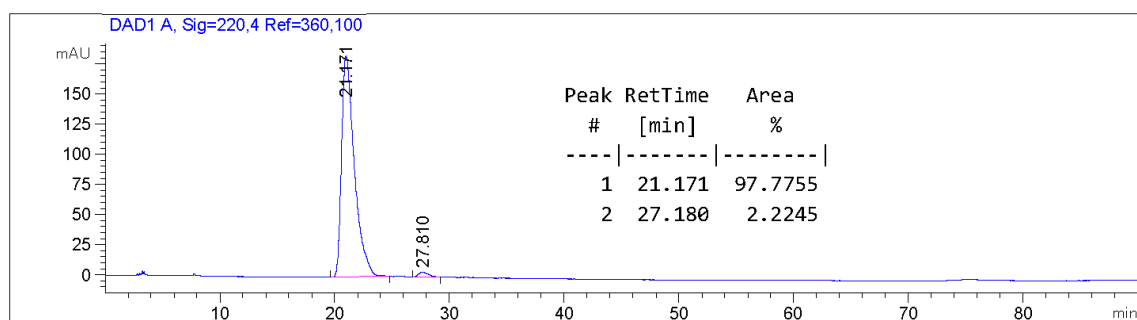

**Figure S25.** HPLC traces of (a) racemic and (b) enantioenriched product (*R,S*)-**3da**.



## Supporting Information

(a)

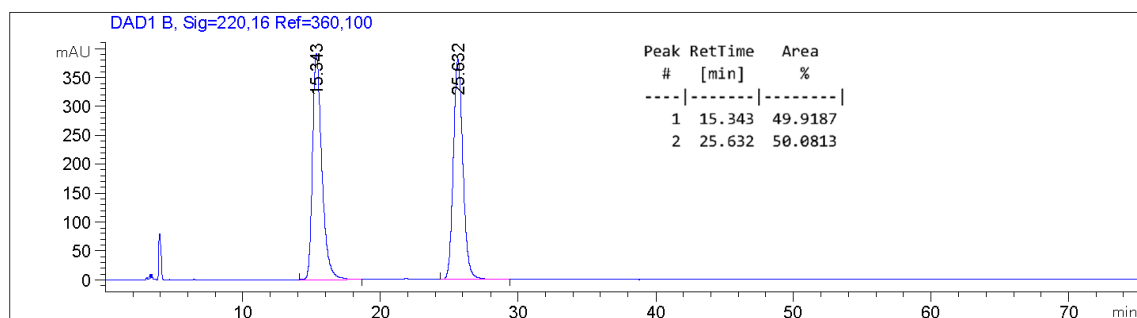

(b)

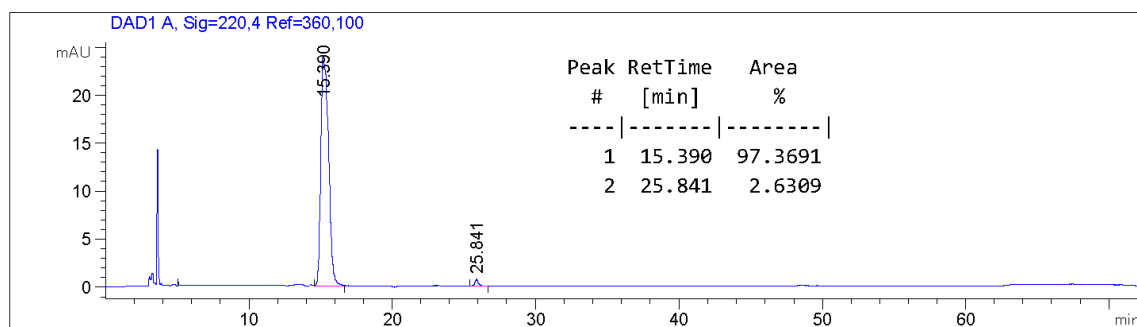

**Figure S28.** HPLC traces of (a) racemic and (b) enantioenriched product (*R,S*)-**3ea**.

## Supporting Information

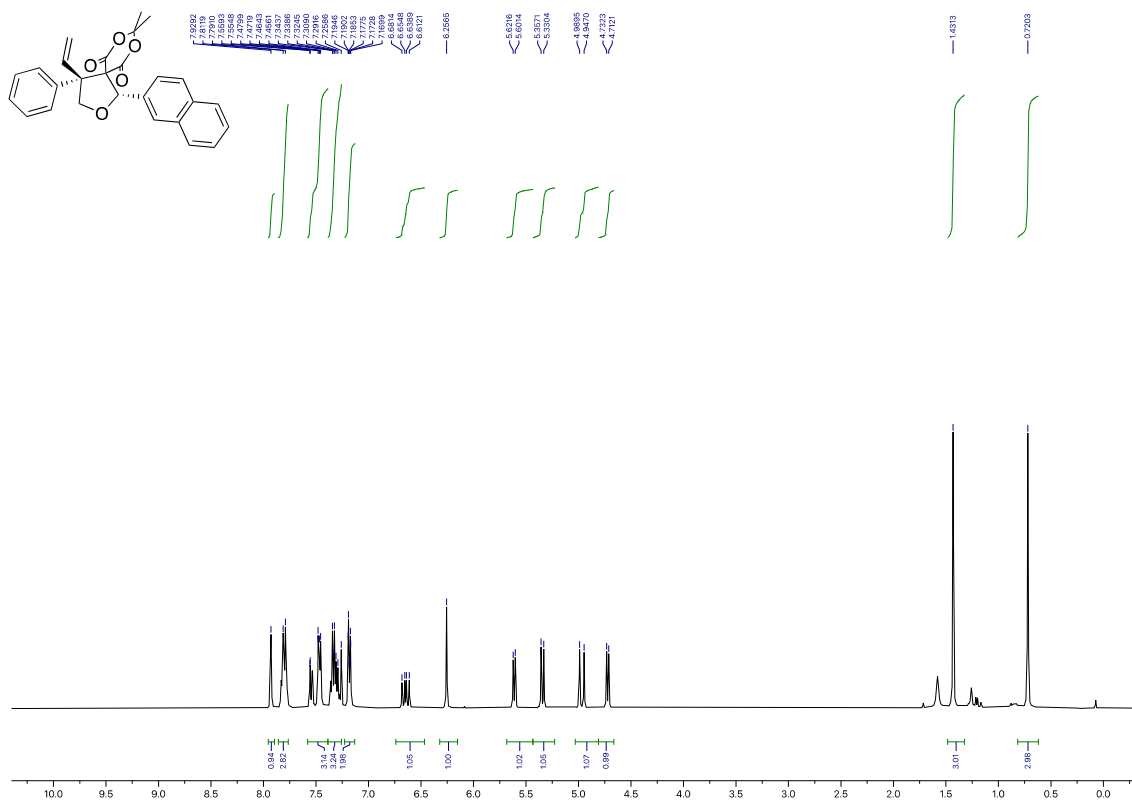

**Figure S29.** <sup>1</sup>H NMR (400 MHz) spectrum of 8,8-dimethyl-1-(naphthalen-2-yl)-4-phenyl-4-vinyl-2,7,9-trioxaspiro[4.5]decane-6,10-dione (**3fa**) in CDCl<sub>3</sub>

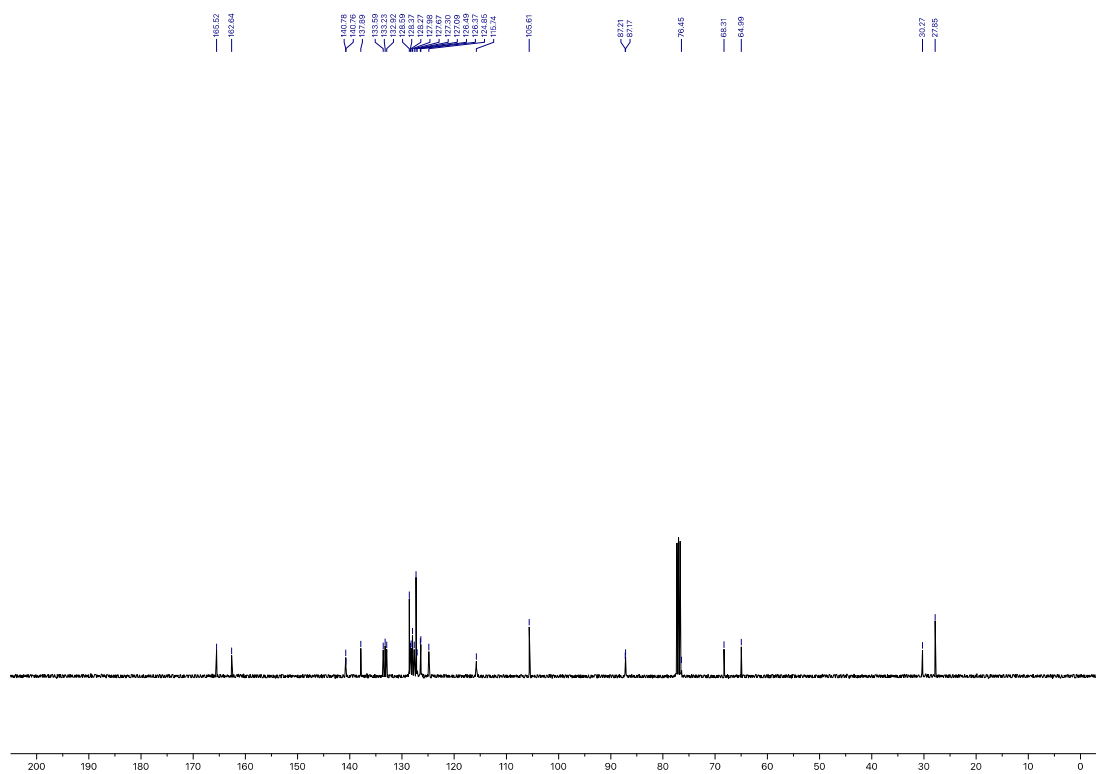

**Figure S30.** <sup>13</sup>C NMR (100.6 MHz) spectrum of **3fa** in CDCl<sub>3</sub>.

## Supporting Information

(a)

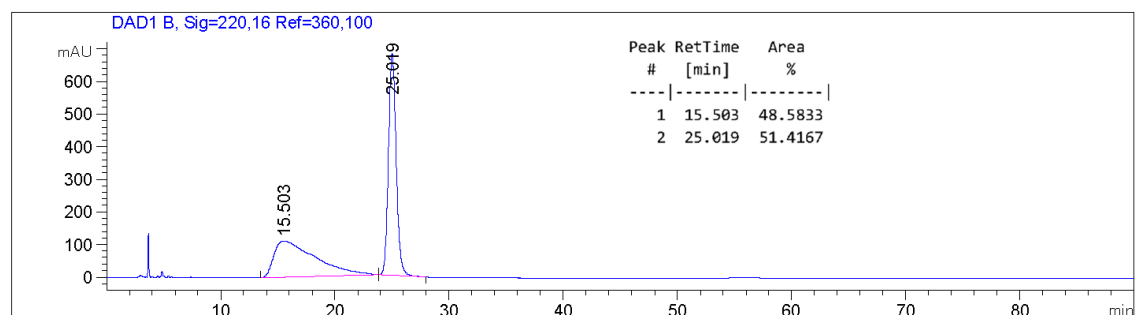

(b)

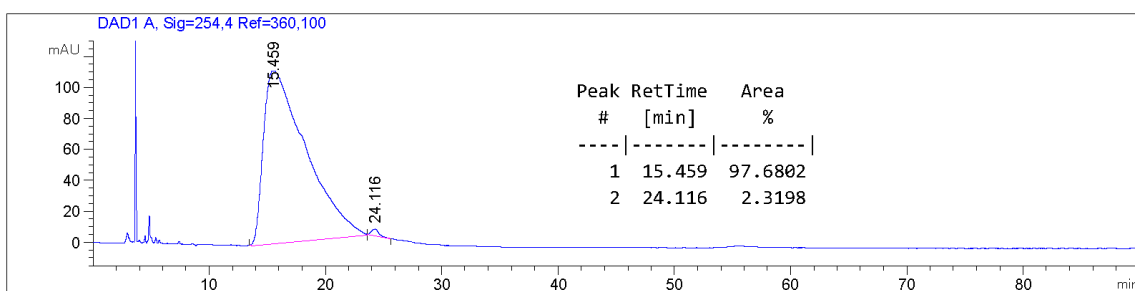

**Figure S31.** HPLC traces of (a) racemic and (b) enantioenriched product (*R,S*)-**3fa**.



## Supporting Information

(a)

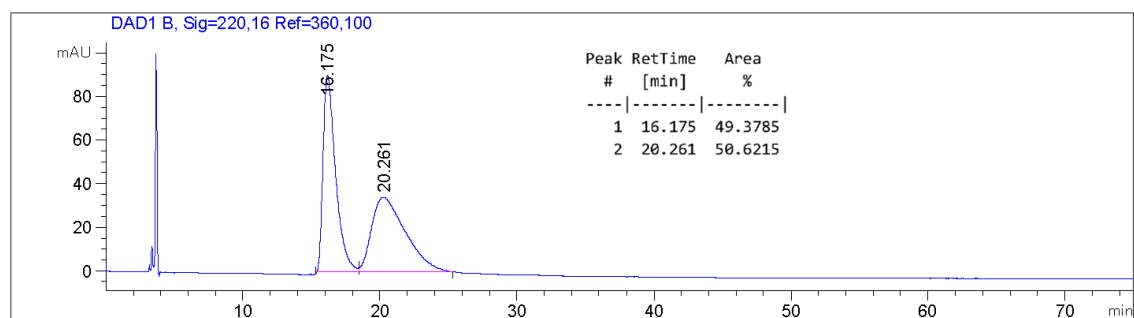

(b)

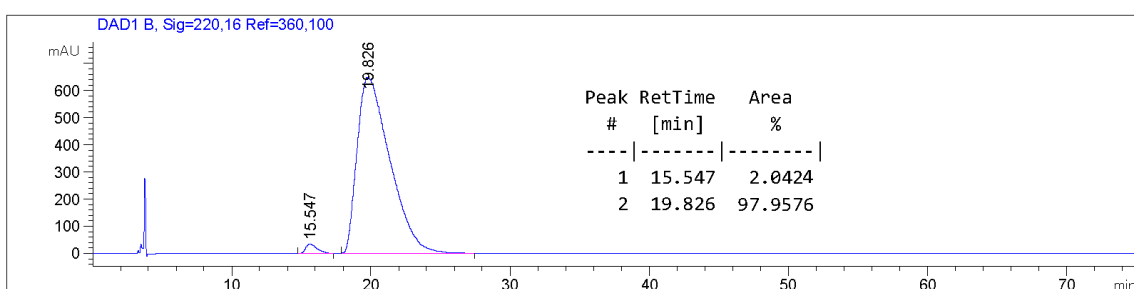

**Figure 34.** HPLC traces of (a) racemic and (b) enantioenriched product (*R,S*)-**3ga**.



## Supporting Information

(a)

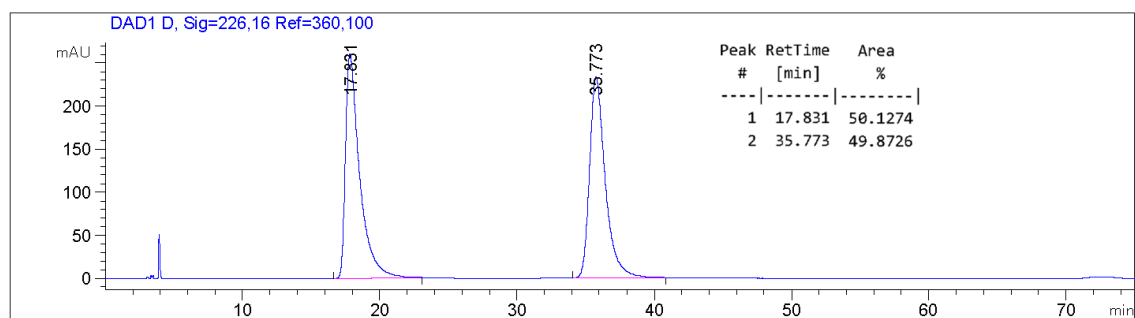

(b)

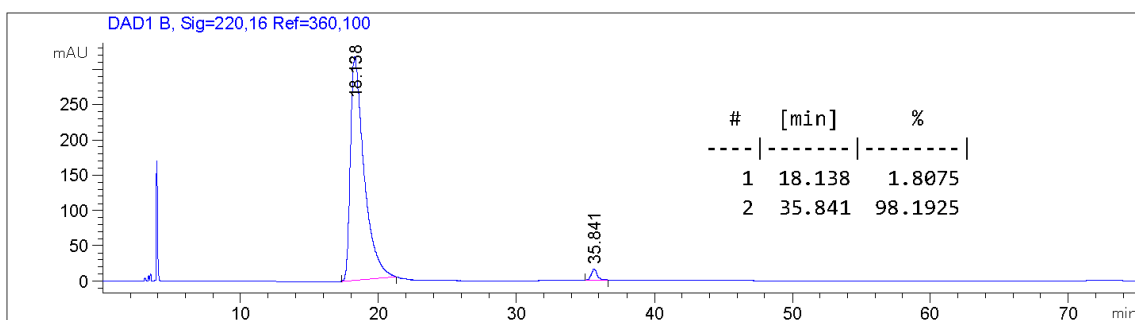

**Figure S37.** HPLC traces of (a) racemic and (b) enantioenriched product **3ha**.

## Supporting Information

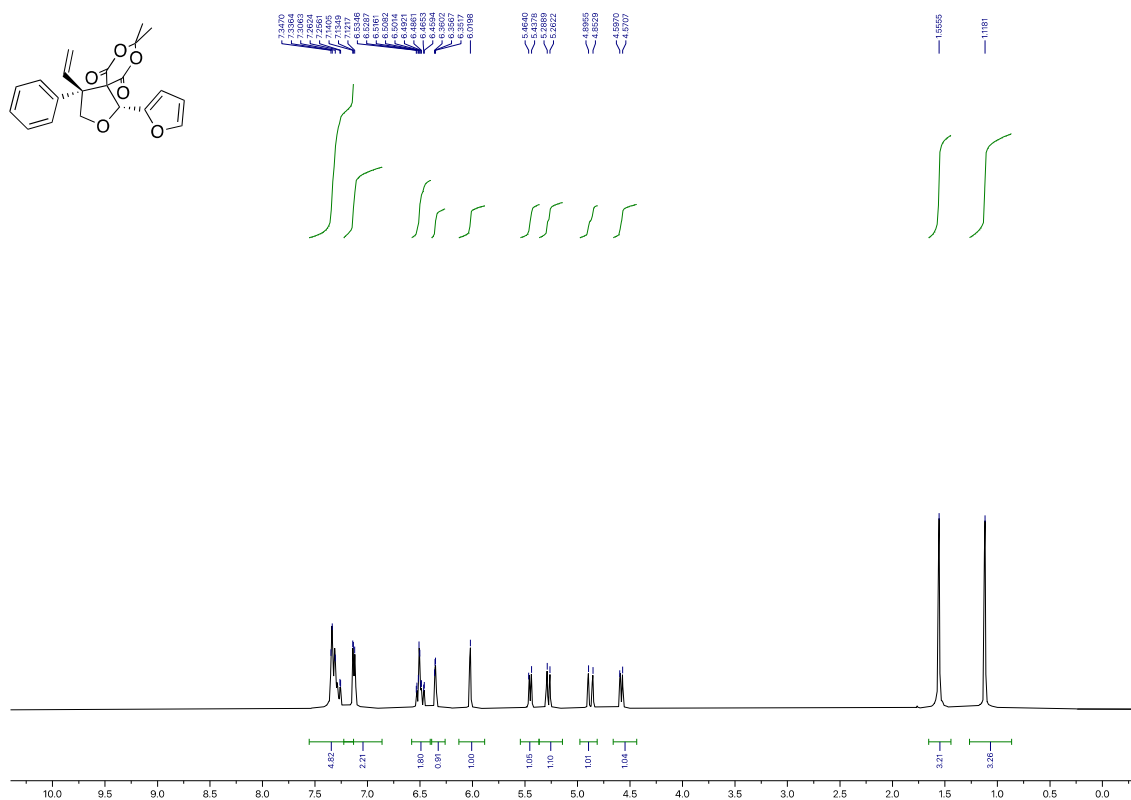

**Figure S38.** <sup>1</sup>H NMR (400 MHz) spectrum of 1-(furan-2-yl)-8,8-dimethyl-4-phenyl-4-vinyl-2,7,9-trioxaspiro[4.5]decane-6,10-dione (**3ia**) in CDCl<sub>3</sub>.

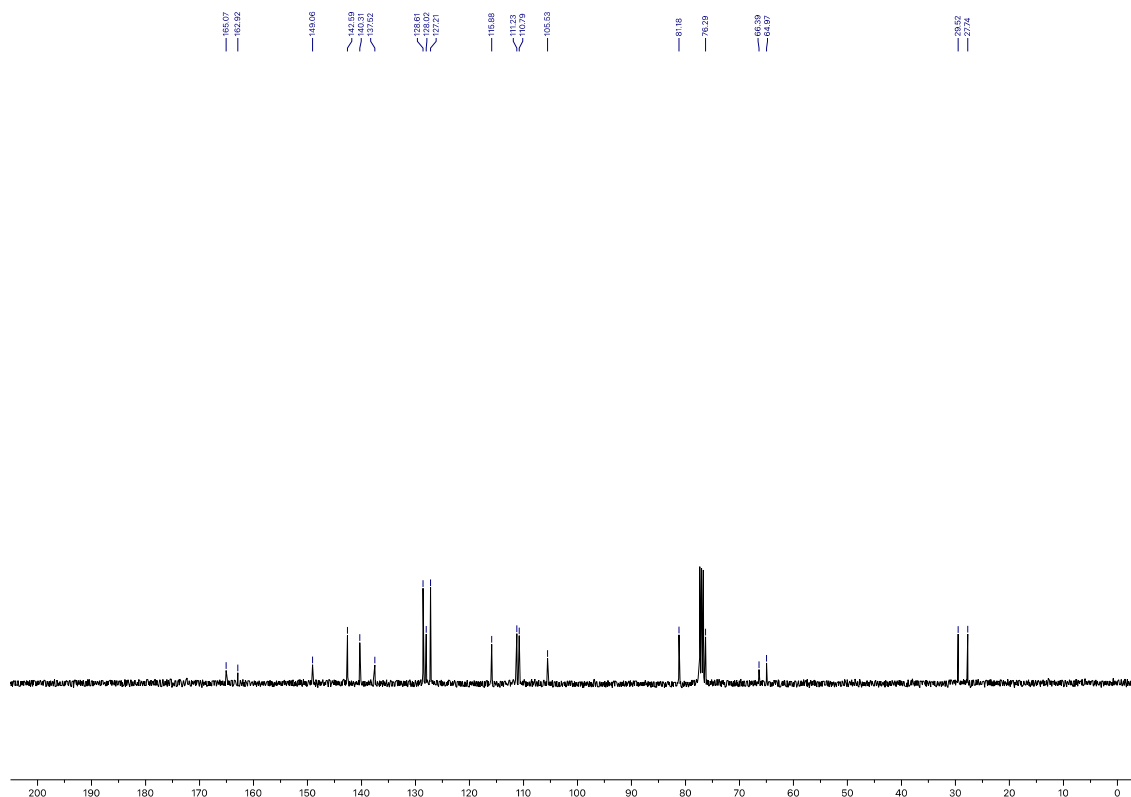

**Figure S39.** <sup>13</sup>C NMR (100.6 MHz) spectrum of **3ia** in CDCl<sub>3</sub>.

## Supporting Information

(a)

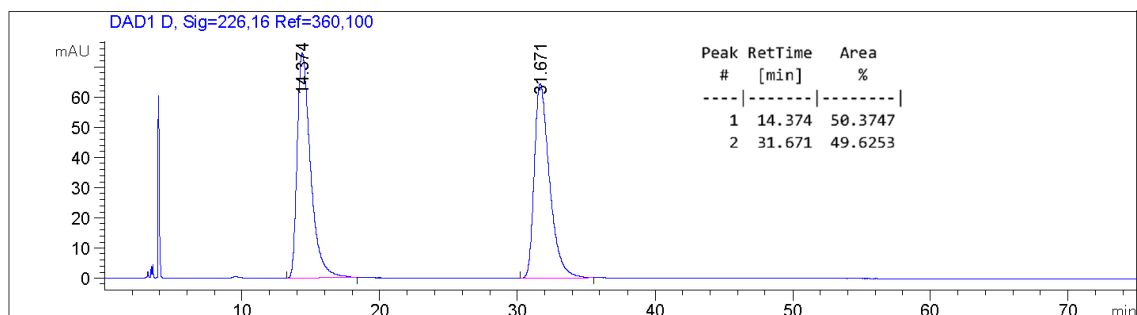

(b)

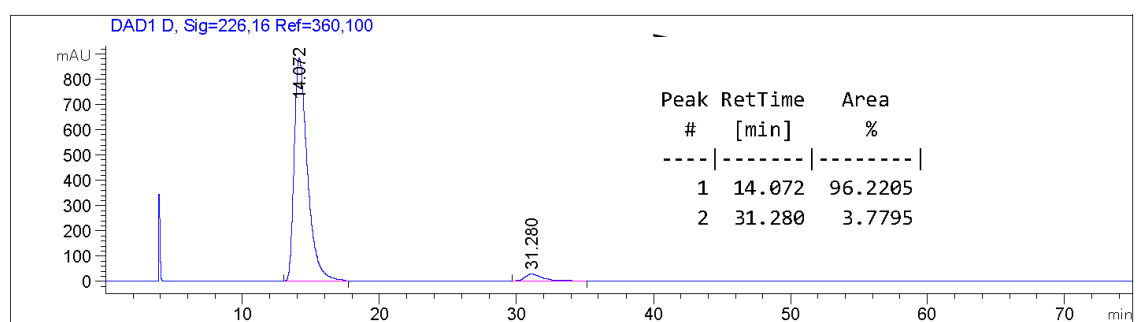

**Figure S40.** HPLC traces of (a) racemic and (b) enantioenriched product (*R,S*)-**3ia**.

## Supporting Information

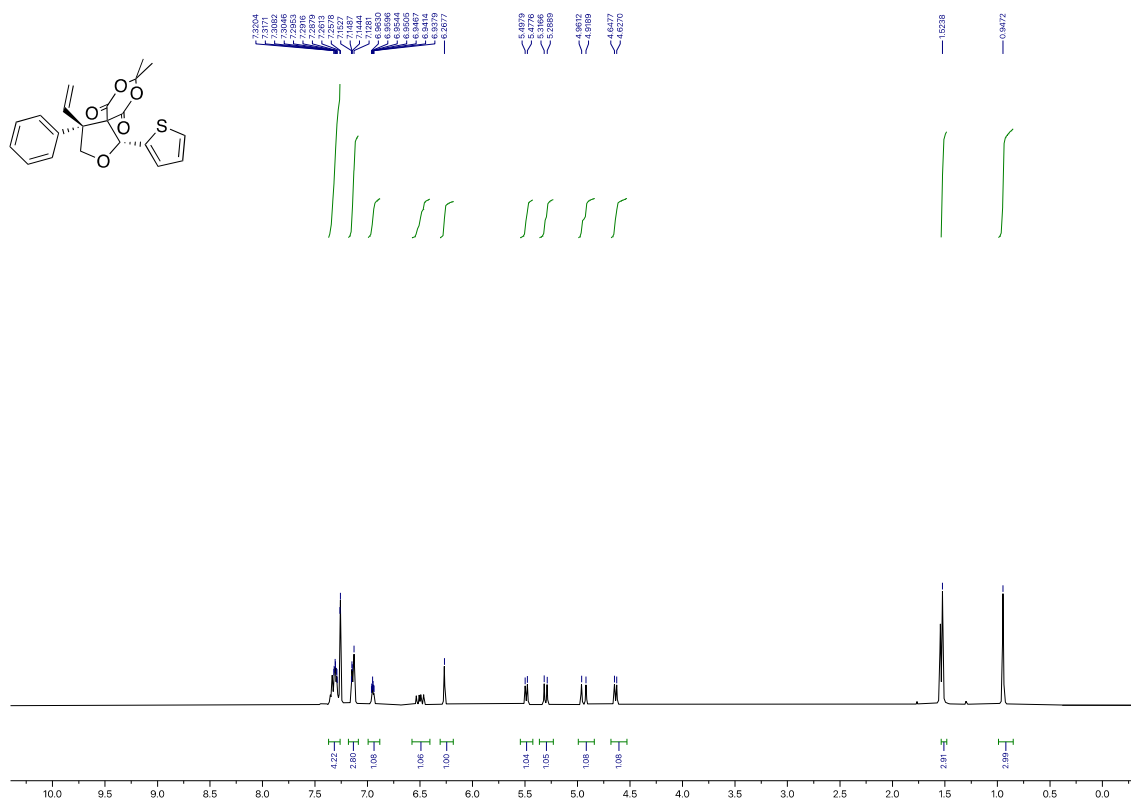

**Figure S41.** <sup>1</sup>H NMR (400 MHz) spectrum of 8,8-dimethyl-4-phenyl-1-(thiophen-2-yl)-4-vinyl-2,7,9-trioxaspiro[4.5]decane-6,10-dione (**3ja**) in CDCl<sub>3</sub>

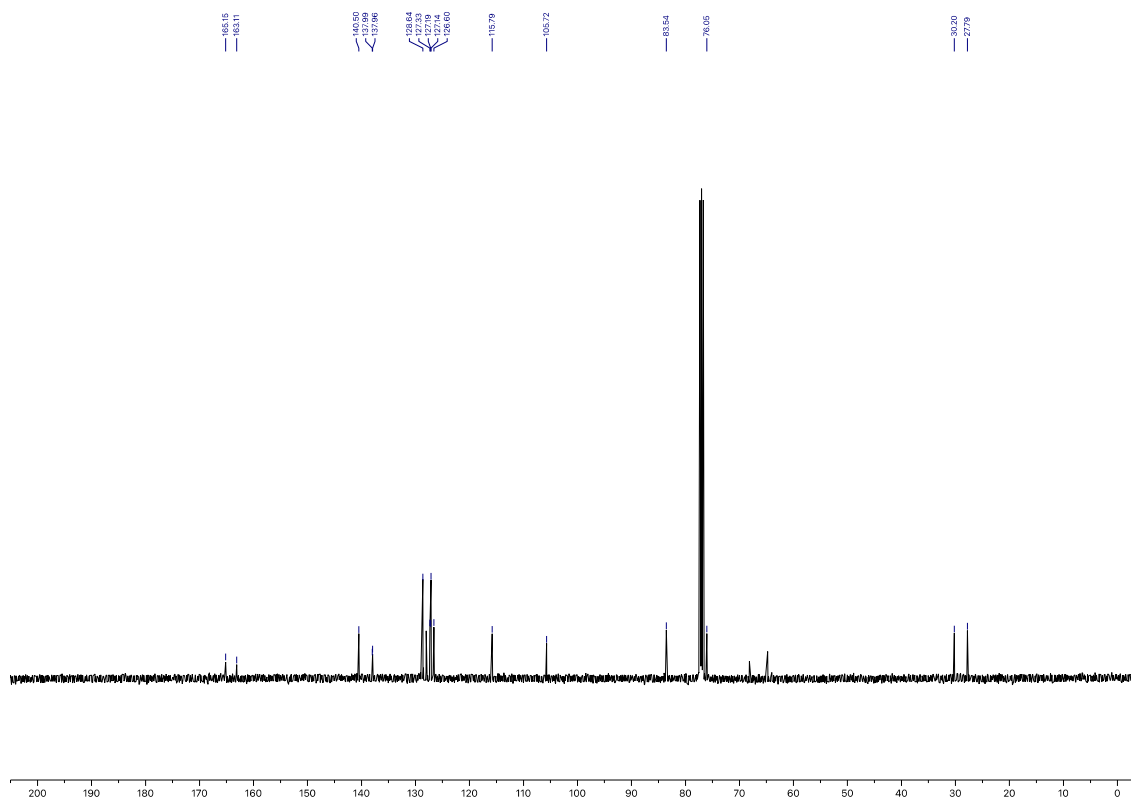

**Figure S42.** <sup>13</sup>C NMR (100.6 MHz) spectrum of **3ja** in CDCl<sub>3</sub>.

## Supporting Information

(a)

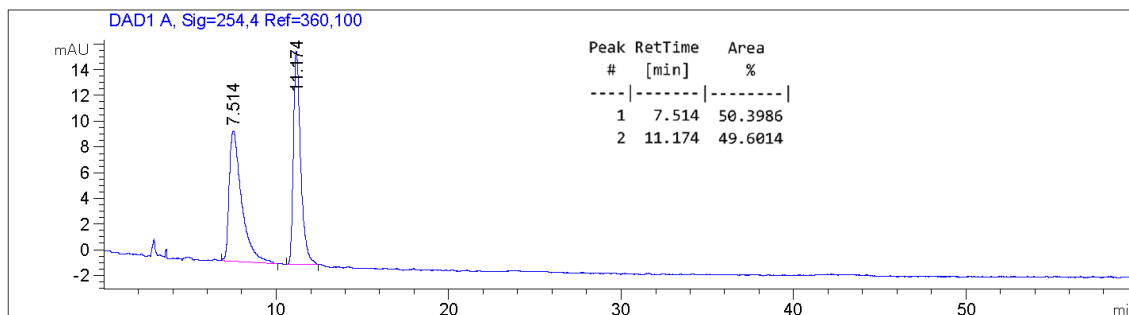

(b)

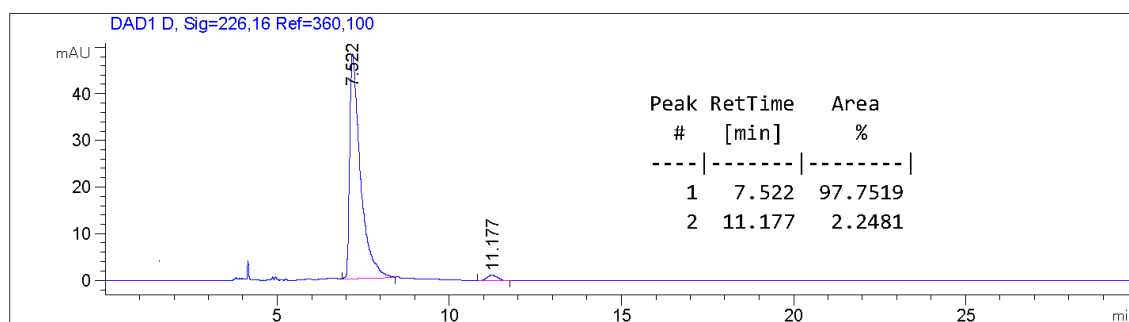

**Figure S43.** HPLC traces of (a) racemic and (b) enantioenriched product (*R,S*)-**3ja**.

## Supporting Information

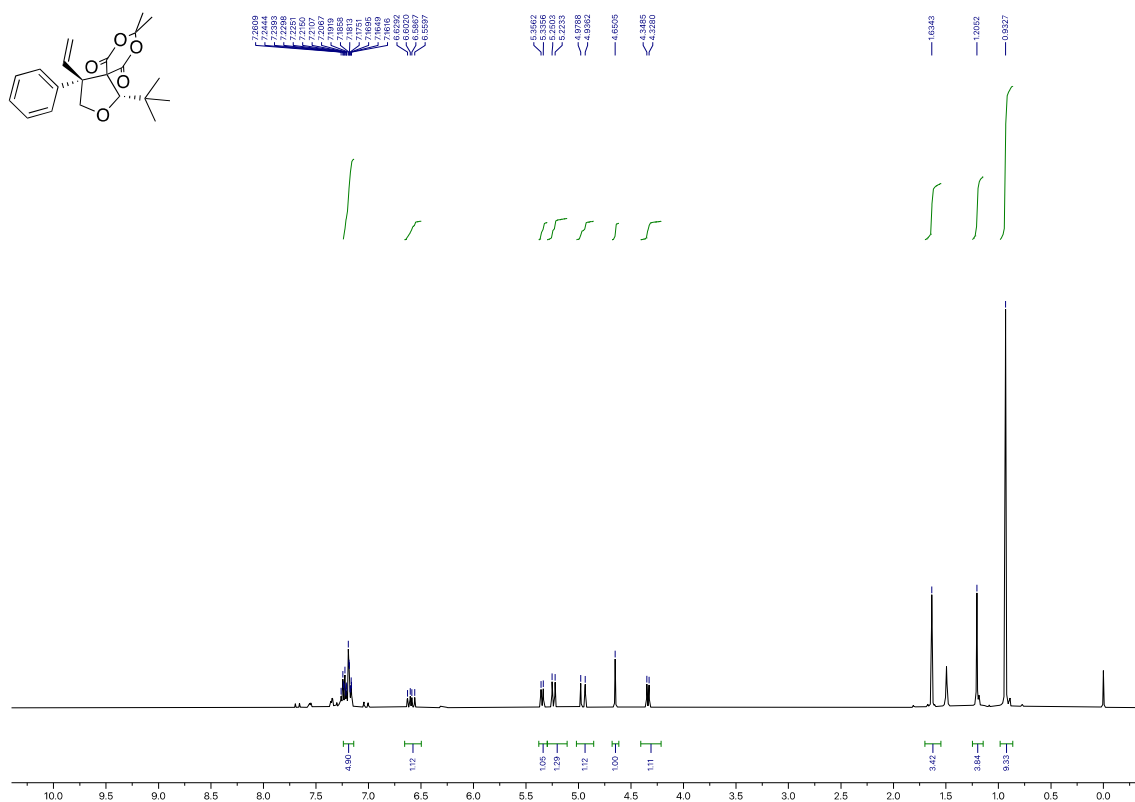

**Figure S44.** <sup>1</sup>H NMR (400 MHz) spectrum of 1-(*tert*-butyl)-8,8-dimethyl-4-phenyl-4-vinyl-2,7,9-trioxaspiro[4.5]decane-6,10-dione (**3ka**) in CDCl<sub>3</sub>

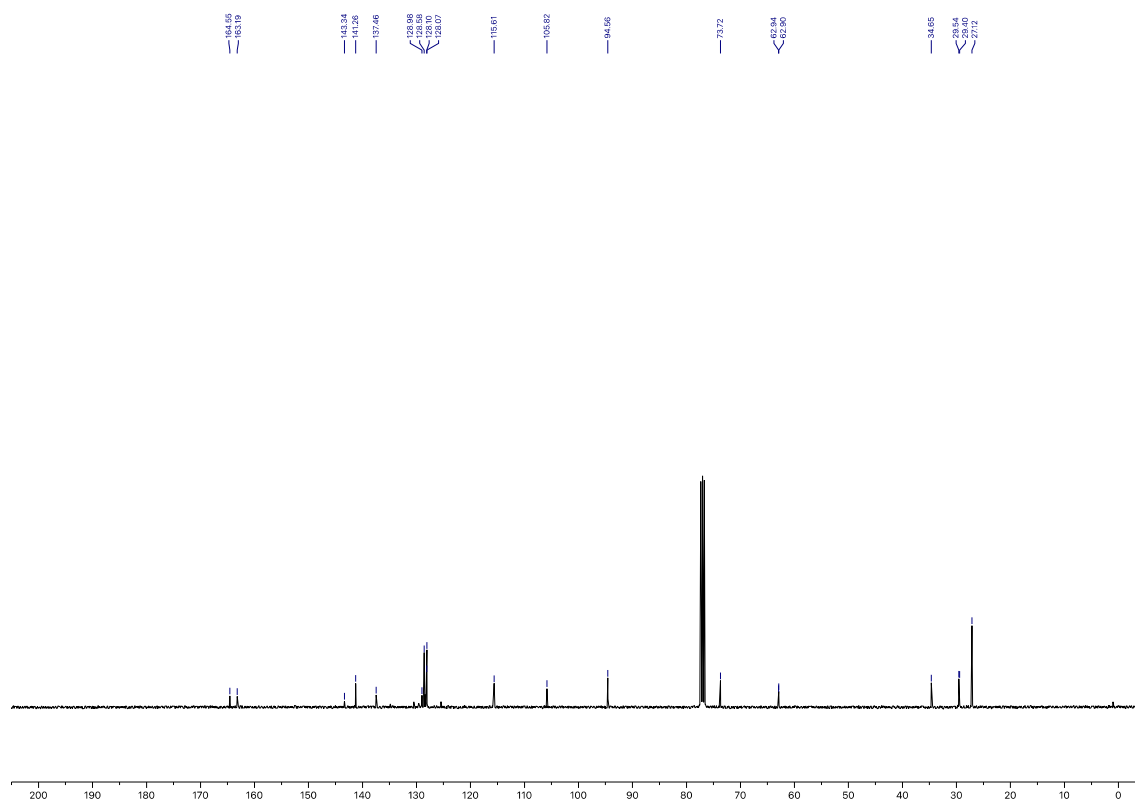

**Figure S45.** <sup>13</sup>C NMR (100.6 MHz) spectrum of **3ka** in CDCl<sub>3</sub>.

## Supporting Information

(a)

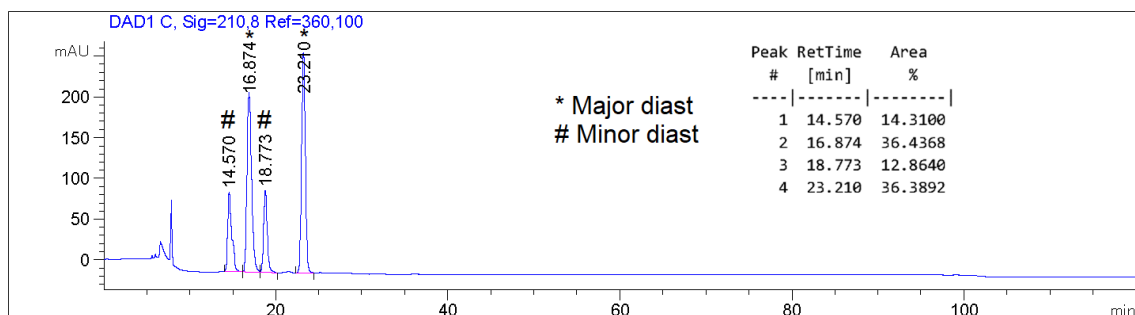

(b)

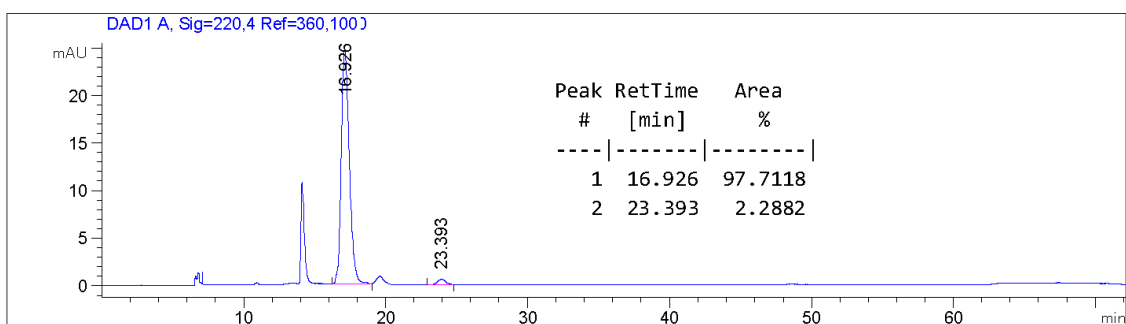

**Figure S46.** HPLC traces of (a) racemic and (b) enantioenriched product (*R,S*)-**3ka**.

## Supporting Information

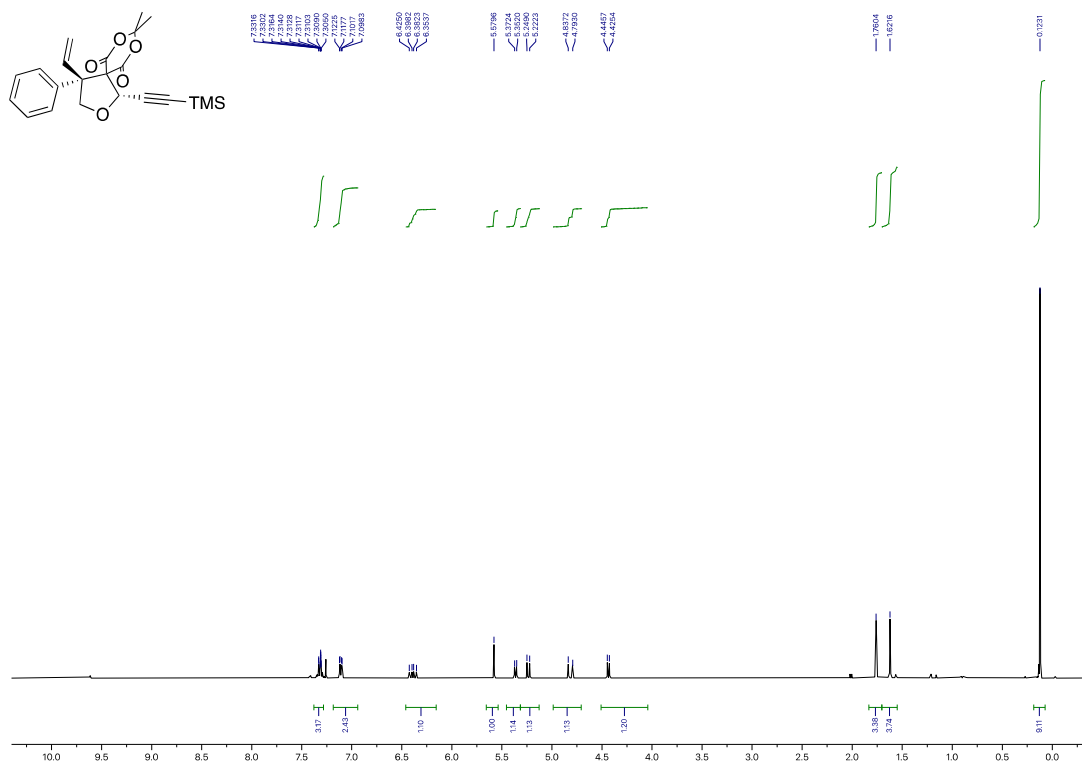

**Figure S47.**  $^1\text{H}$  NMR (400 MHz) spectrum of 8,8-dimethyl-4-phenyl-1-((trimethylsilyl)ethynyl)-4-vinyl-2,7,9-trioxaspiro[4.5]decane-6,10-dione (**3la**) in  $\text{CDCl}_3$

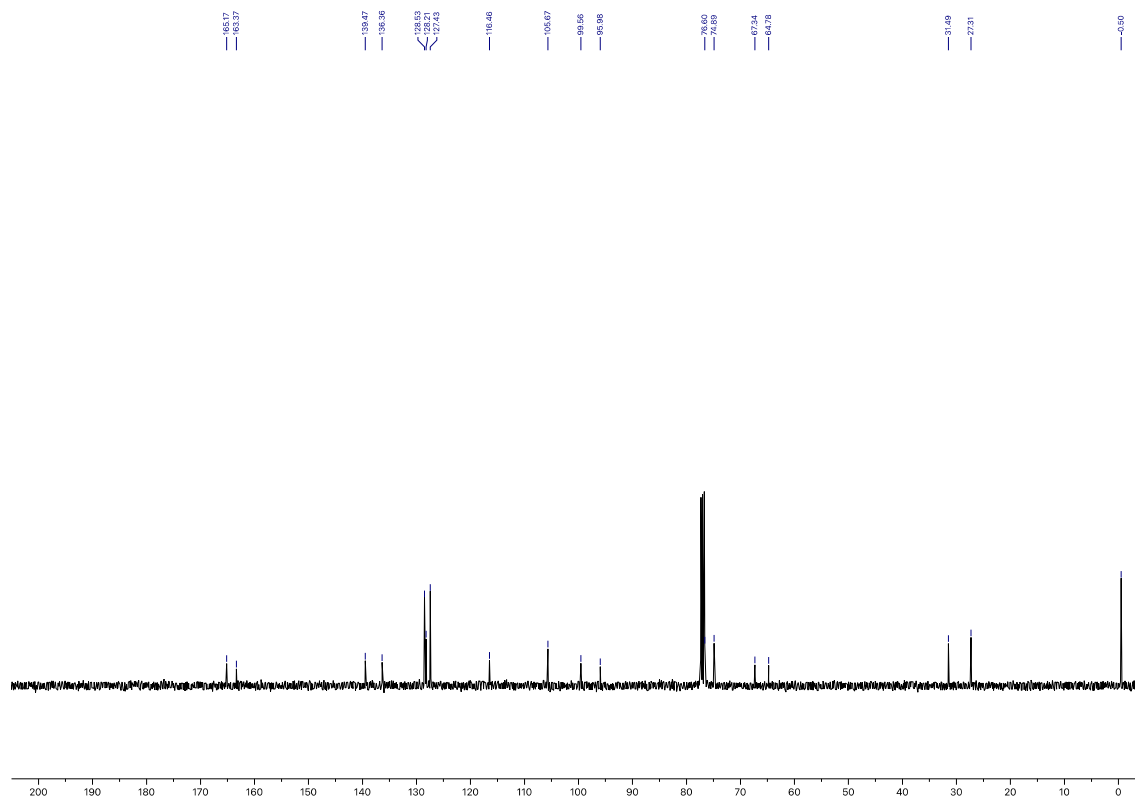

**Figure S48.**  $^{13}\text{C}$  NMR (100.6 MHz) spectrum of **3la**  $\text{CDCl}_3$ .

## Supporting Information

(a)

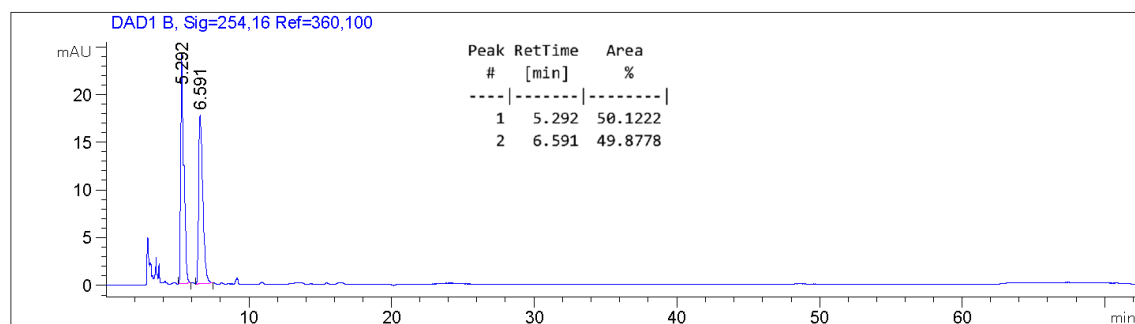

(b)

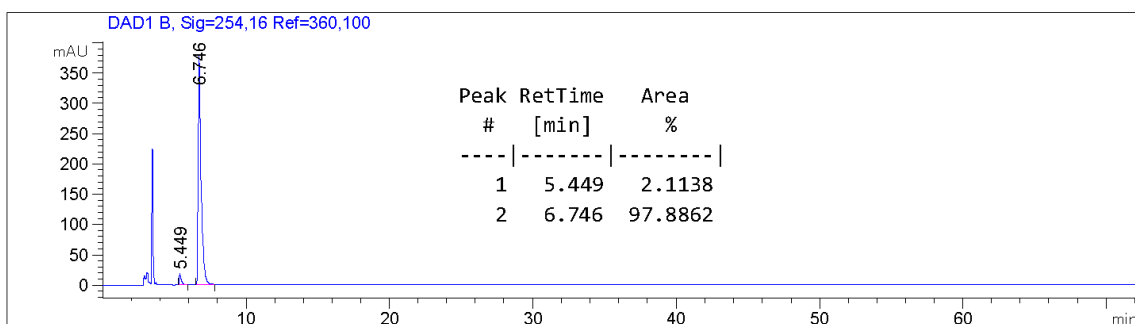

**Figure S49.** HPLC traces of (a) racemic and (b) enantioenriched product (*R,S*)-**3la**.

## Supporting Information

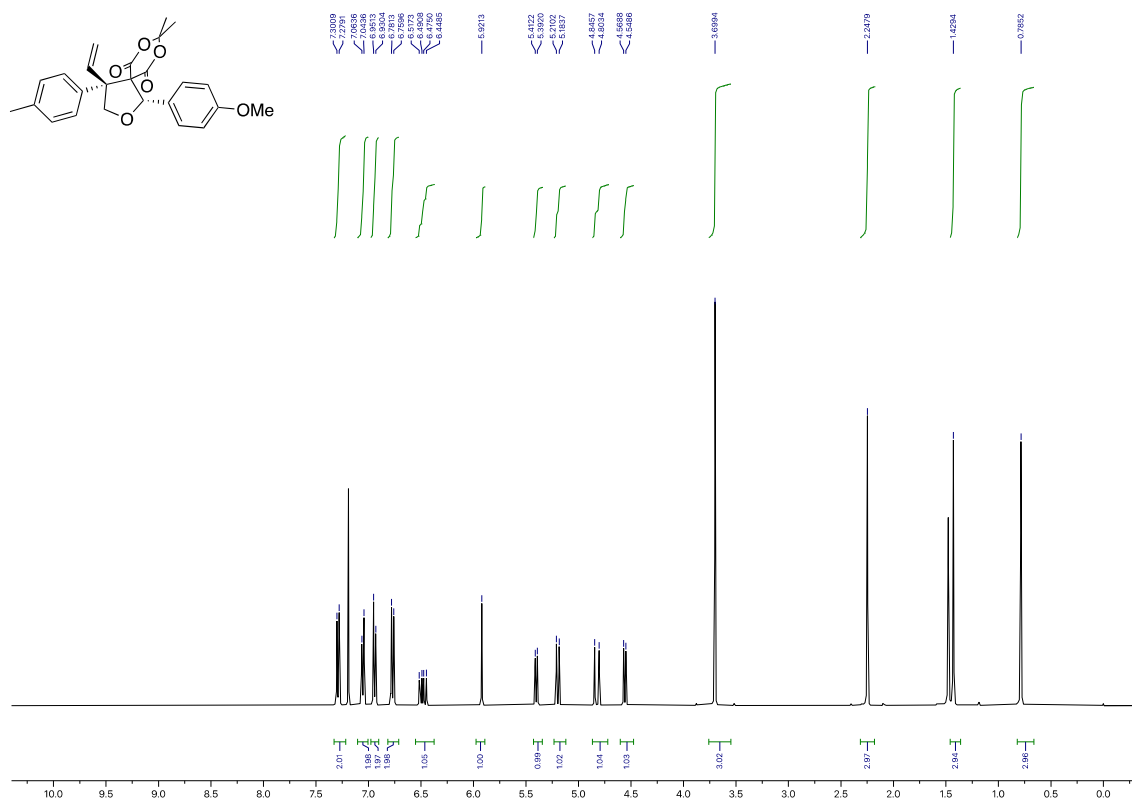

**Figure S50.** <sup>1</sup>H NMR (400 MHz) spectrum of 1-(4-methoxyphenyl)-8,8-dimethyl-4-(*p*-tolyl)-4-vinyl-2,7,9-trioxaspiro[4.5]decane-6,10-dione (**3ab**) in CDCl<sub>3</sub>.

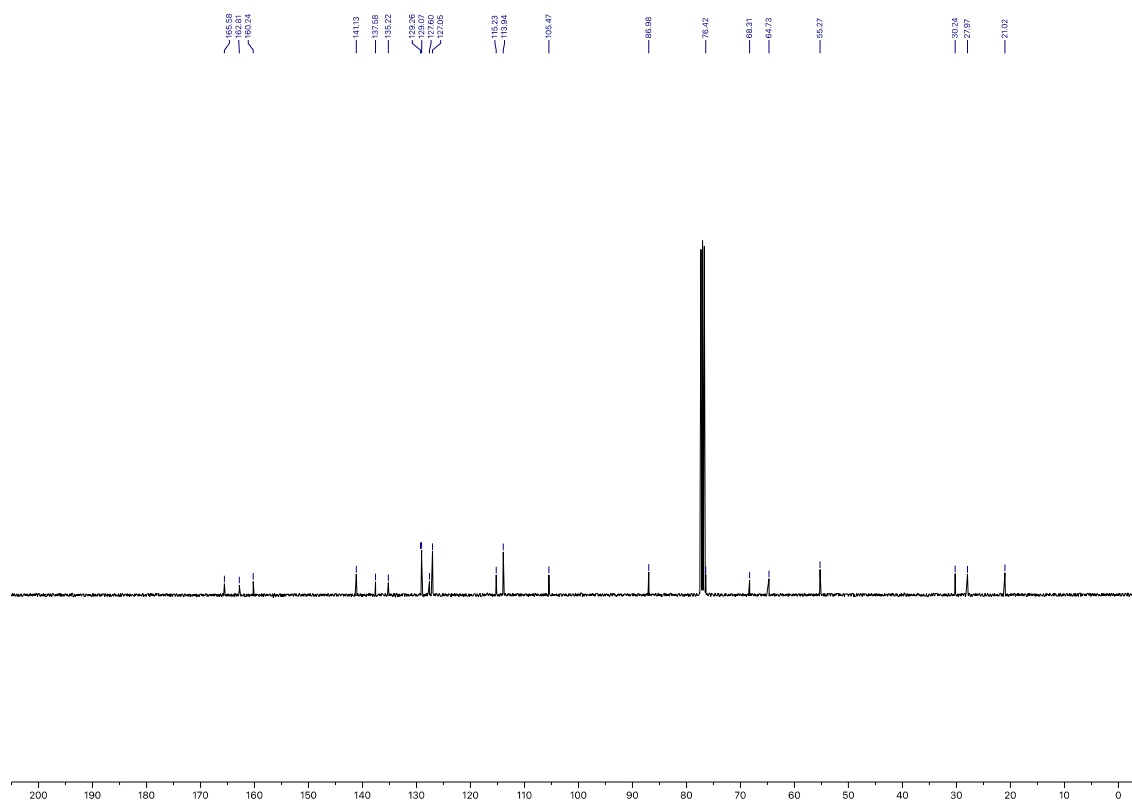

**Figure S51.** <sup>13</sup>C NMR (100.6 MHz) spectrum of **3ab** in CDCl<sub>3</sub>.

## Supporting Information

(a)

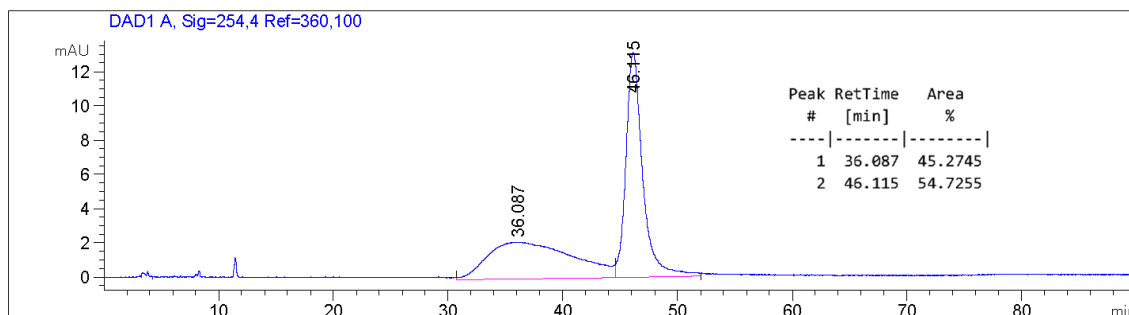

(b)

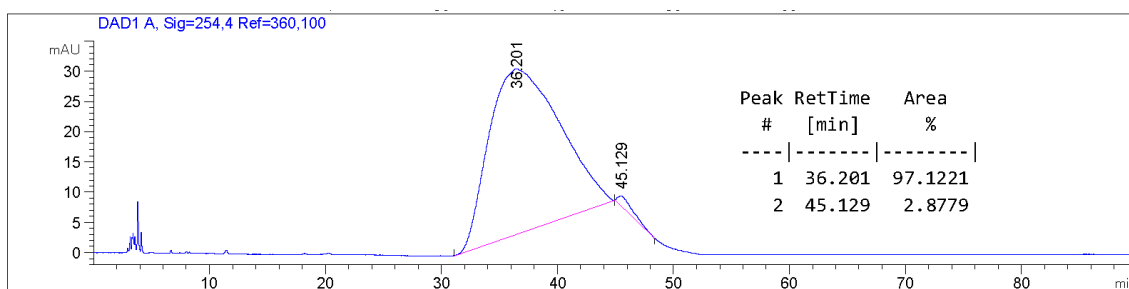

**Figure S52.** HPLC traces of (a) racemic and (b) enantioenriched product (*R,S*)-**3ab**.

## Supporting Information

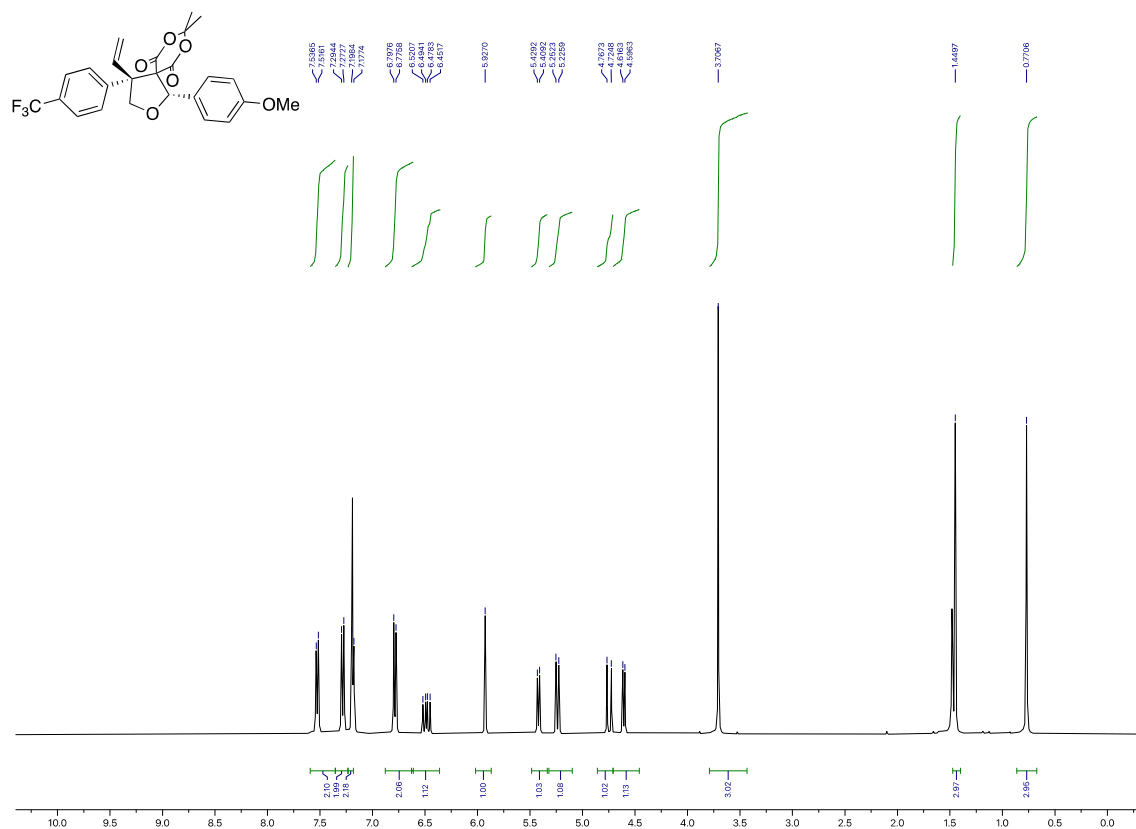

**Figure S53.** <sup>1</sup>H NMR (400 MHz) spectrum of 4-(4-fluorophenyl)-1-(4-methoxyphenyl)-8,8-dimethyl-4-vinyl-2,7,9-trioxaspiro[4.5]decane-6,10-dione (**3ad**) in CDCl<sub>3</sub>.

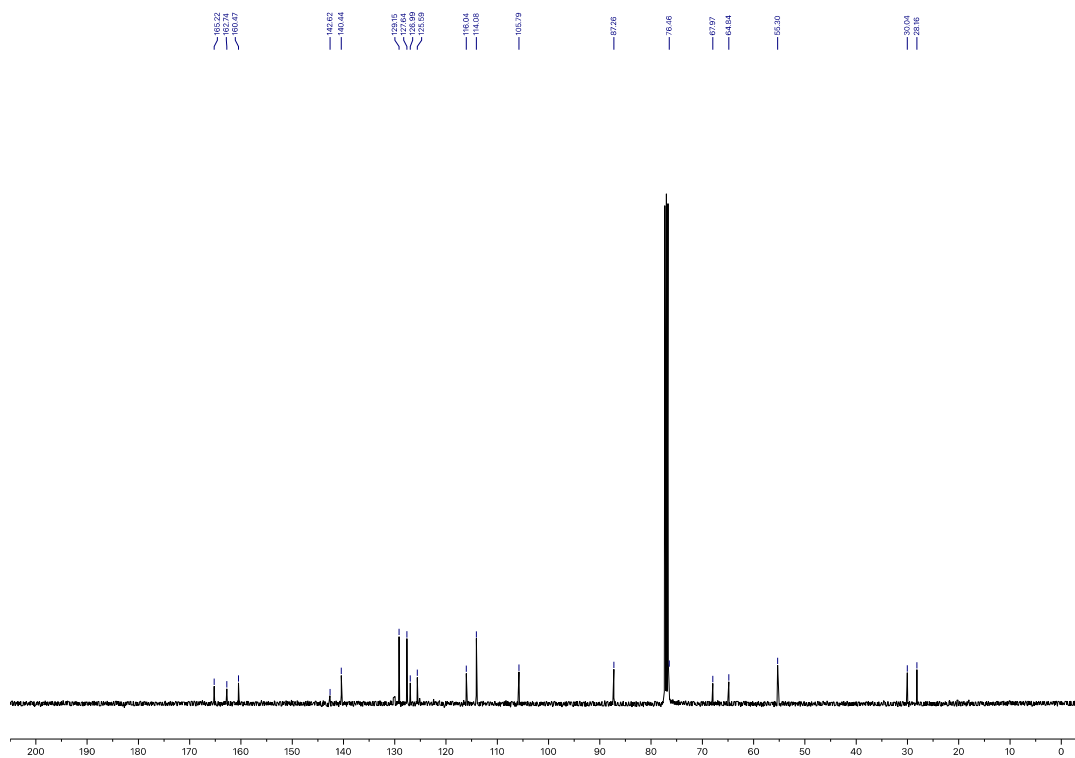

**Figure S54.** <sup>13</sup>C NMR (100.6 MHz) spectrum of **3ad** in CDCl<sub>3</sub>.

## Supporting Information

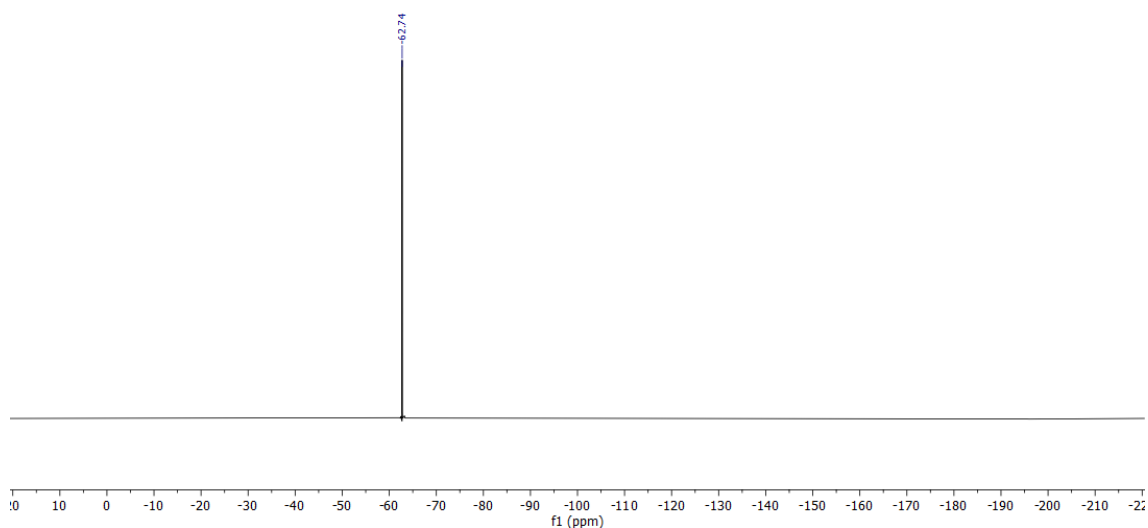

**Figure S55.**  $^{19}\text{F}$  NMR (376 MHz) spectrum of **3ad** in  $\text{CDCl}_3$ .

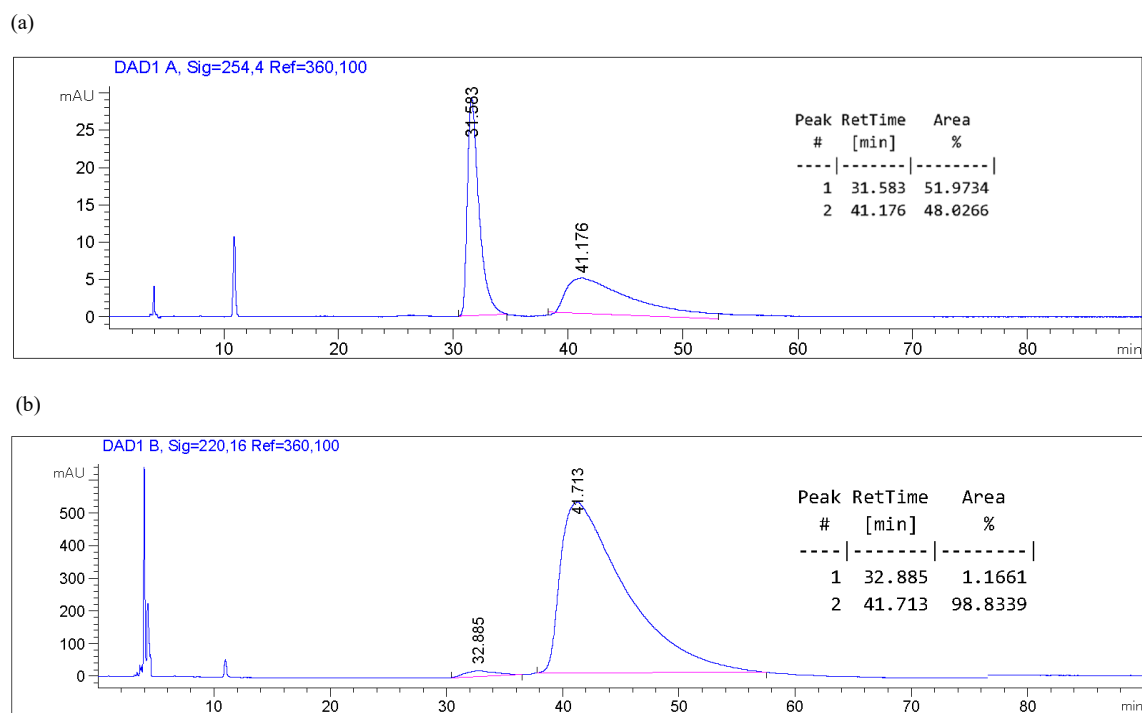

**Figure S56.** HPLC traces of (a) racemic and (b) enantioenriched product (*R,S*)-**3ad**.

## Supporting Information

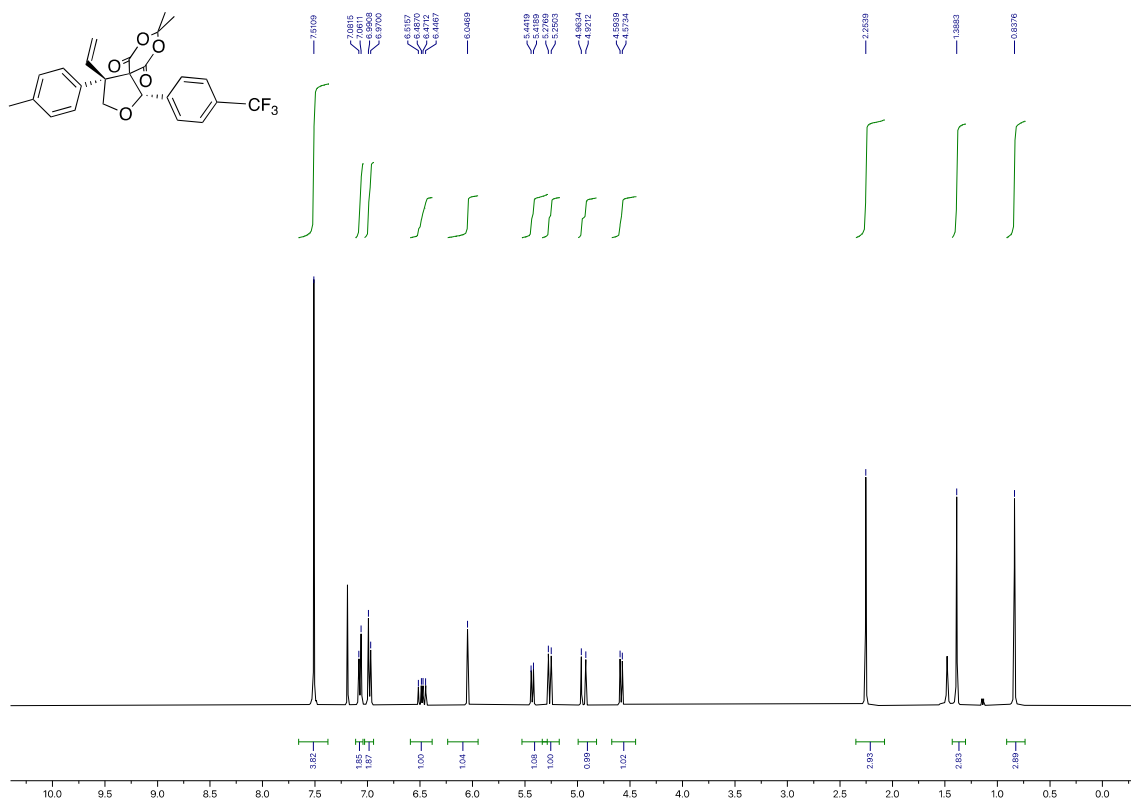

**Figure S57.**  $^1\text{H}$  NMR (400 MHz) spectrum of 8,8-dimethyl-4-(*p*-tolyl)-1-(4-(trifluoromethyl) phenyl)-4-vinyl-2,7,9-trioxaspiro[4.5]decane-6,10-dione (**3bb**) in  $\text{CDCl}_3$ .

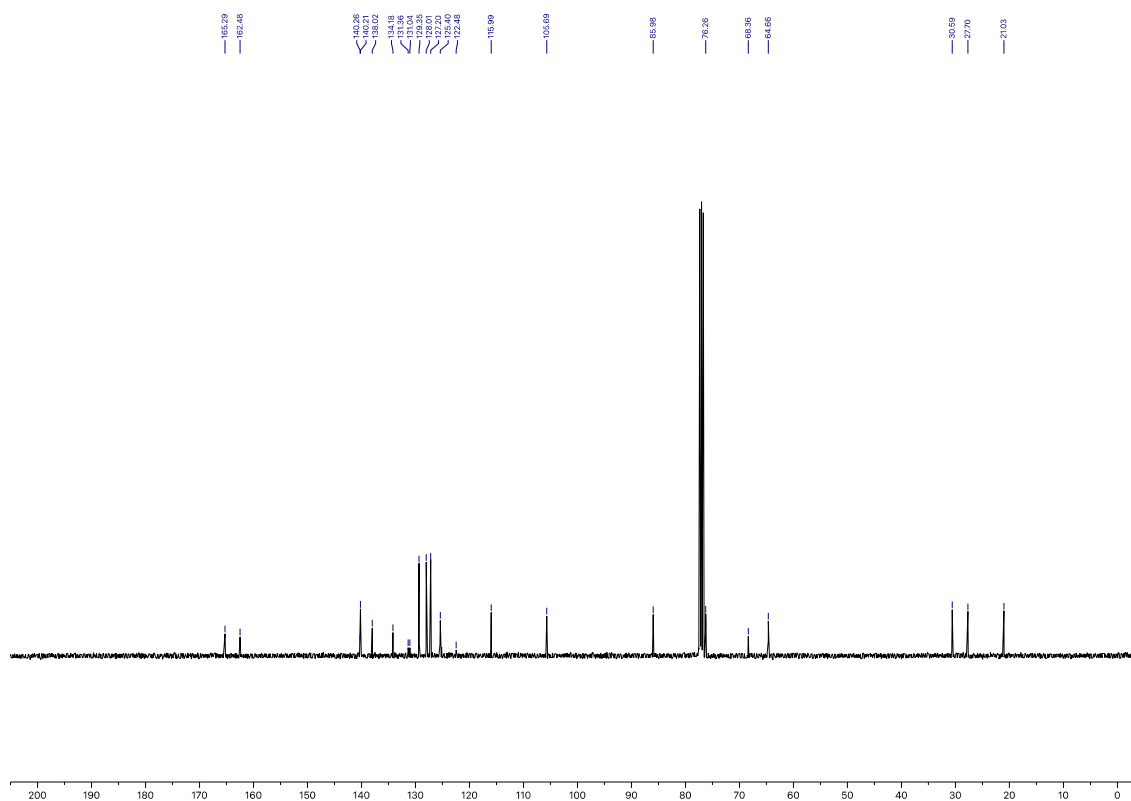

**Figure S58.**  $^{13}\text{C}$  NMR (100.6 MHz) spectrum of **3bb** in  $\text{CDCl}_3$ .

## Supporting Information

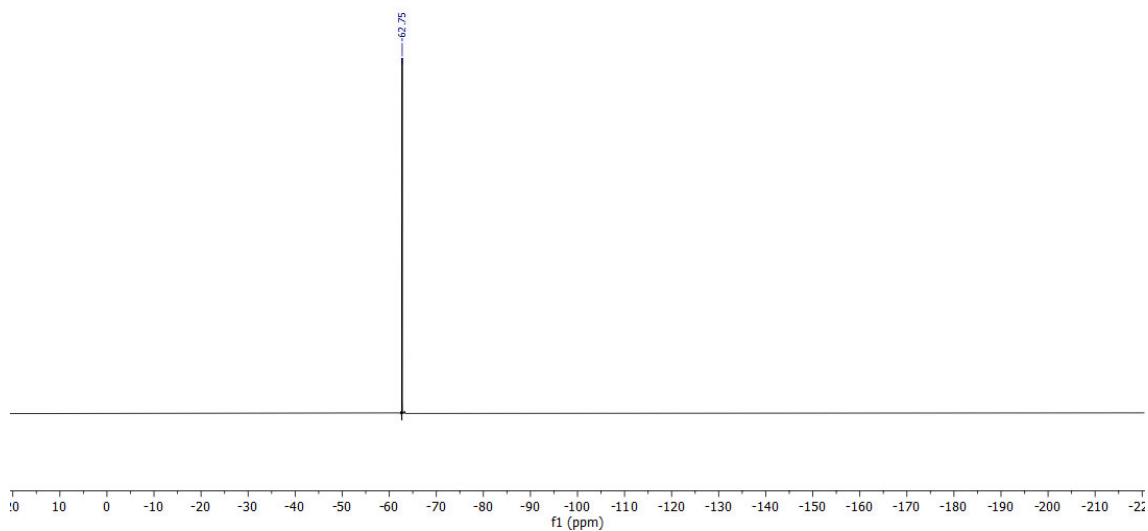

**Figure S59.**  $^{19}\text{F}$  NMR (376 MHz) spectrum of **3bb** in  $\text{CDCl}_3$ .

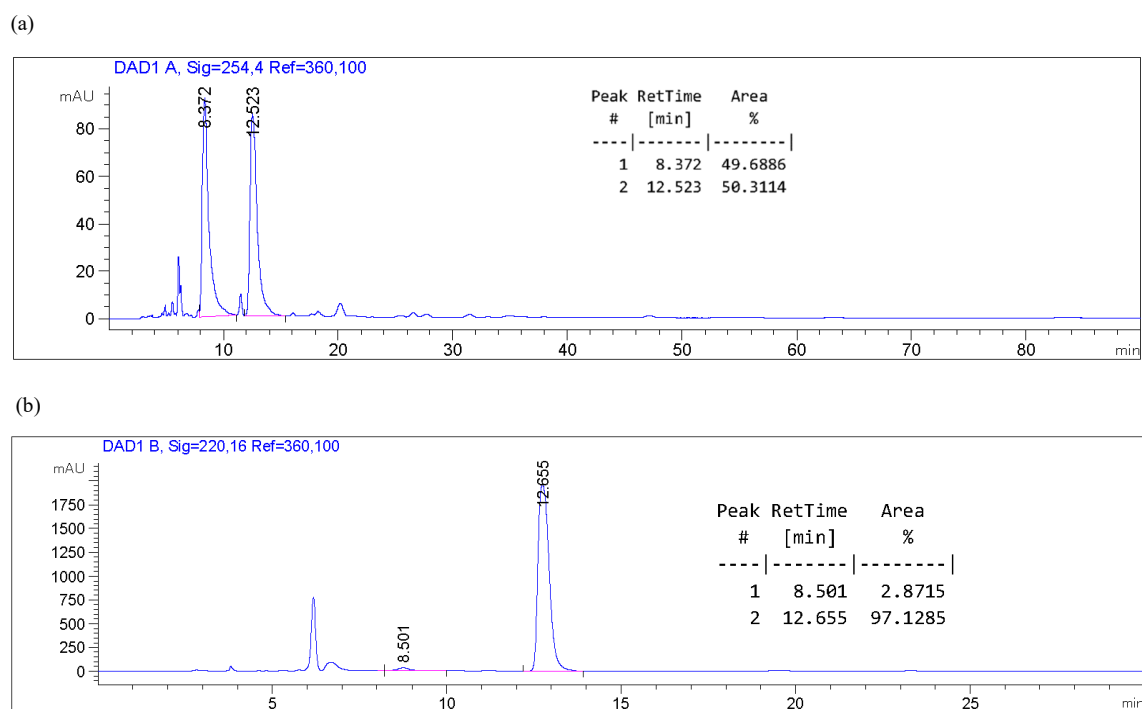

**Figure S60.** HPLC traces of (a) racemic and (b) enantioenriched product (*R,S*)-**3bb**.

## Supporting Information

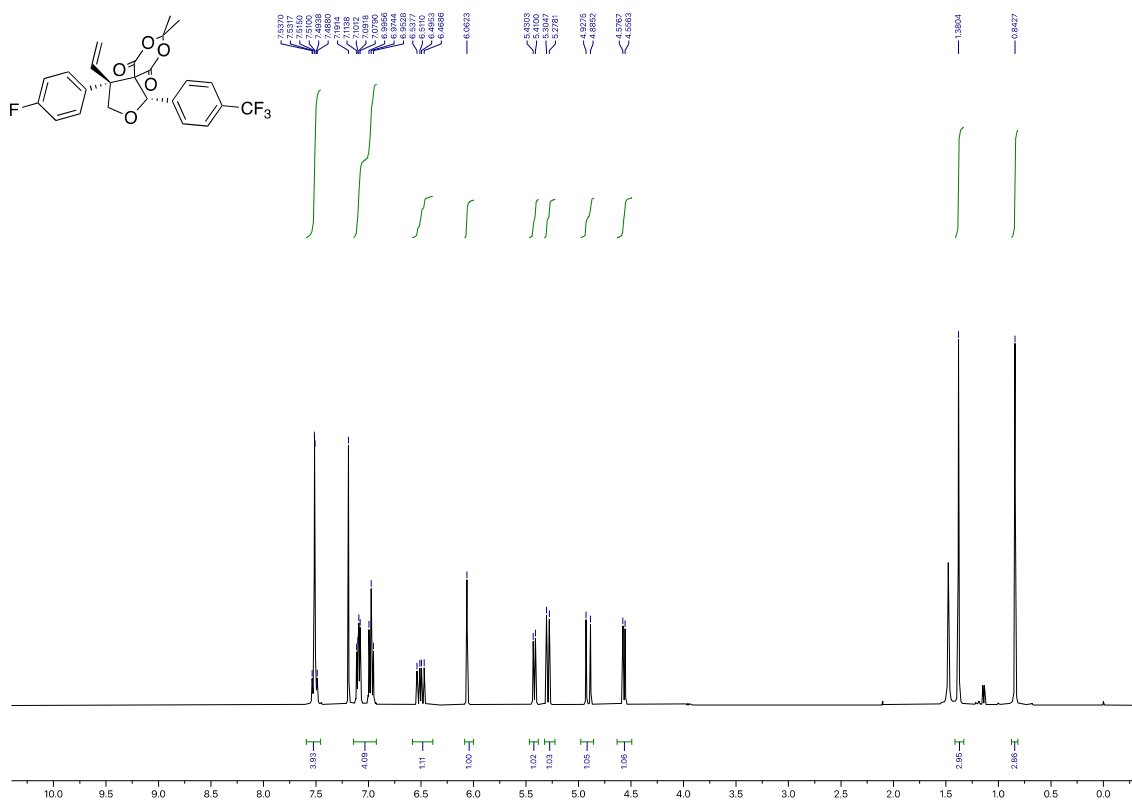

**Figure S61.** <sup>1</sup>H NMR (400 MHz) spectrum 4-(4-fluorophenyl)-8,8-dimethyl-1-(4-(trifluoromethyl)phenyl)-4-vinyl-2,7,9-trioxaspiro[4.5]decane-6,10-dione (**3bc**) in CDCl<sub>3</sub>.

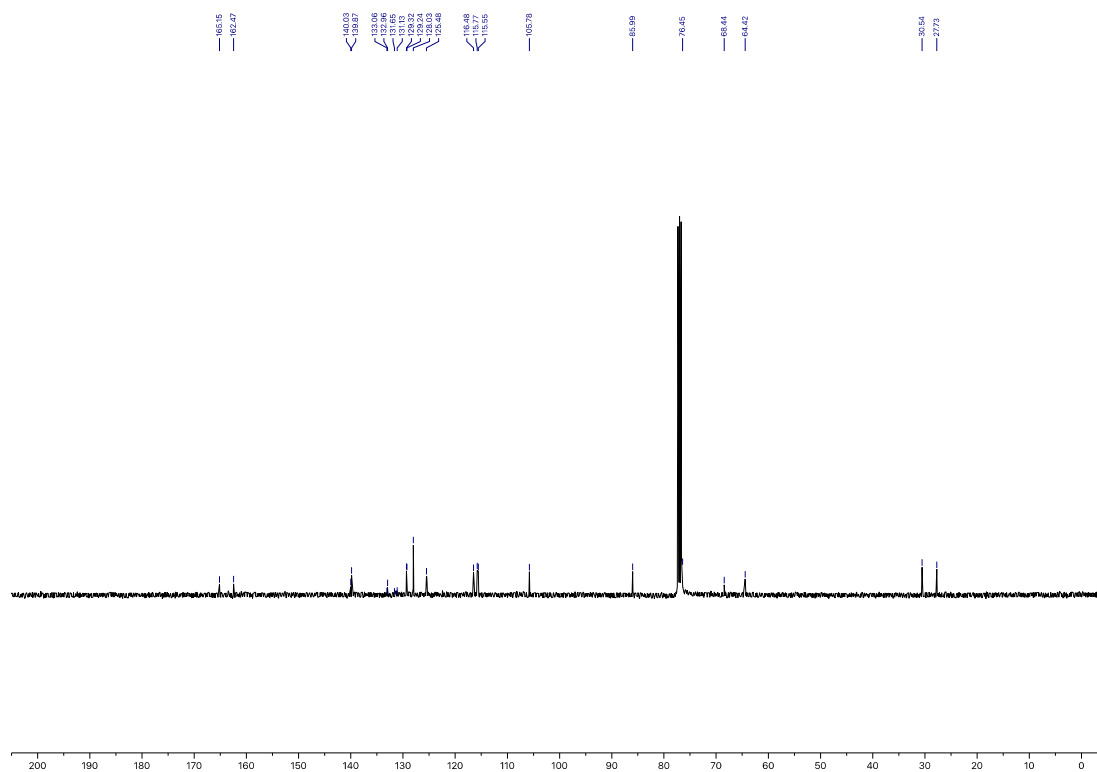

**Figure S62.** <sup>13</sup>C NMR (100.6 MHz) spectrum of **3bc** in CDCl<sub>3</sub>.

## Supporting Information

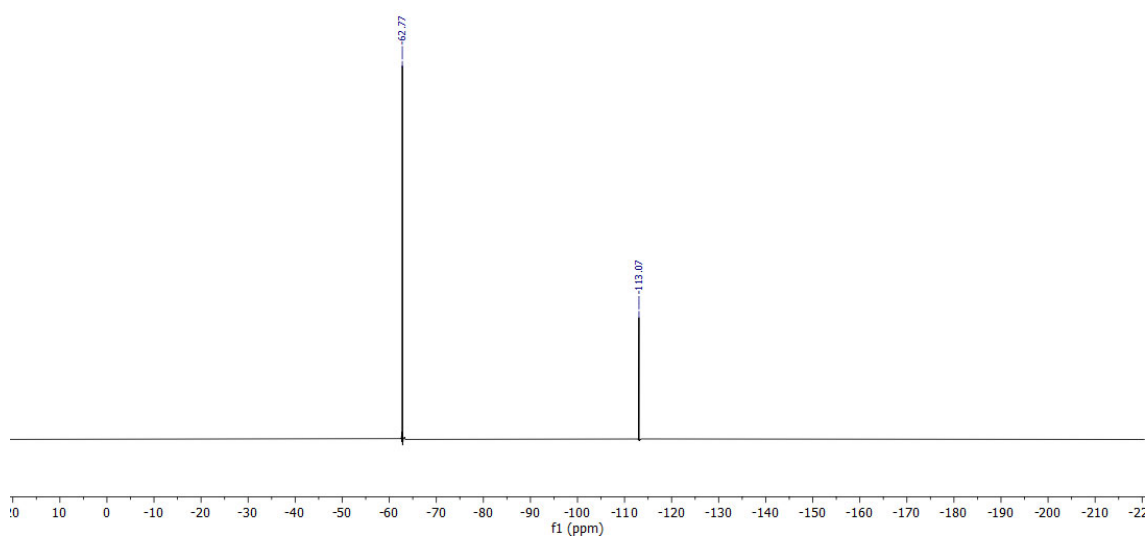

**Figure S63.** <sup>19</sup>F NMR (376 MHz) spectrum of **3bc** in CDCl<sub>3</sub>.

(a)

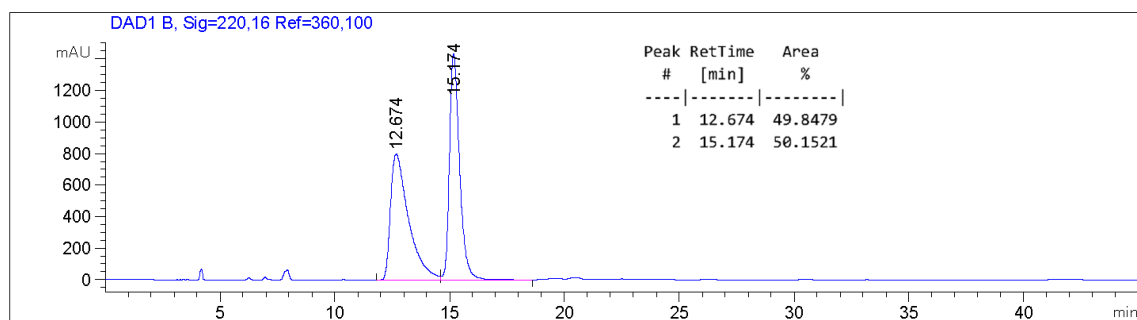

(b)

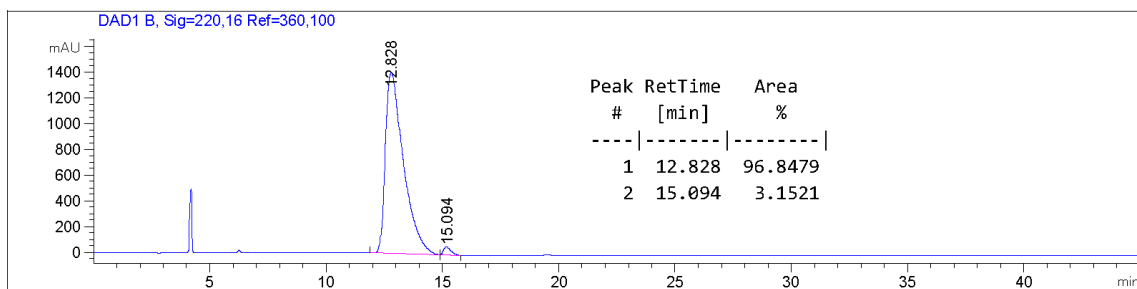

**Figure S64.** HPLC traces of (a) racemic and (b) enantioenriched (*R,S*)-**3bc**.

## Supporting Information

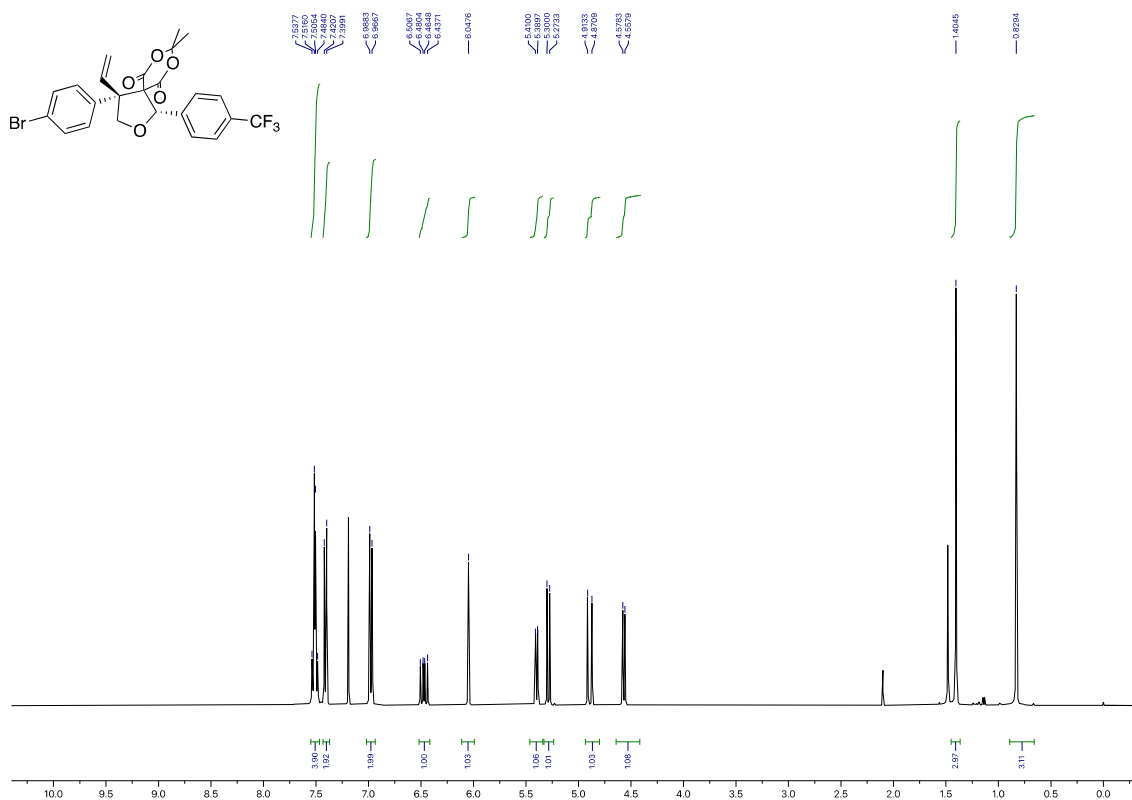

**Figure S65.** <sup>1</sup>H NMR (400 MHz) spectrum of 4-(4-bromophenyl)-8,8-dimethyl-1-(4-(trifluoromethyl)phenyl)-4-vinyl-2,7,9-trioxaspiro[4.5]decane-6,10-dione (**3be**) in CDCl<sub>3</sub>.

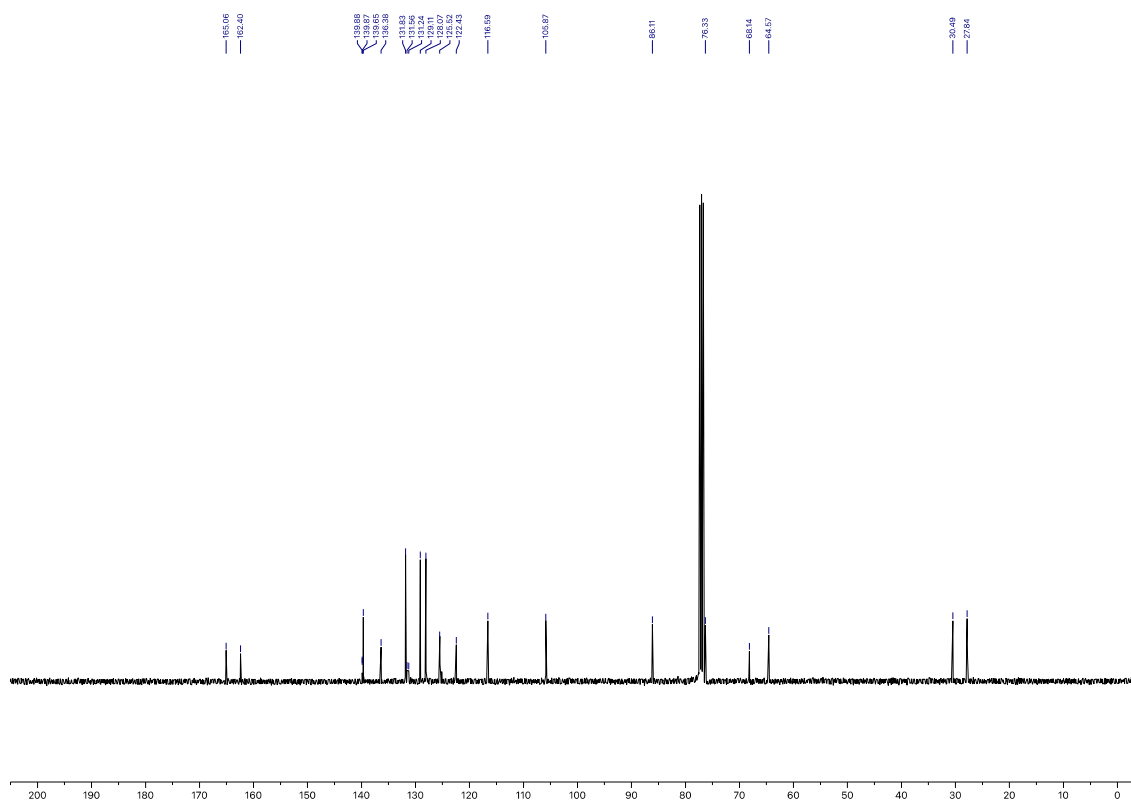

**Figure S66.** <sup>13</sup>C NMR (100.6 MHz) spectrum of **3be** in CDCl<sub>3</sub>.

## Supporting Information

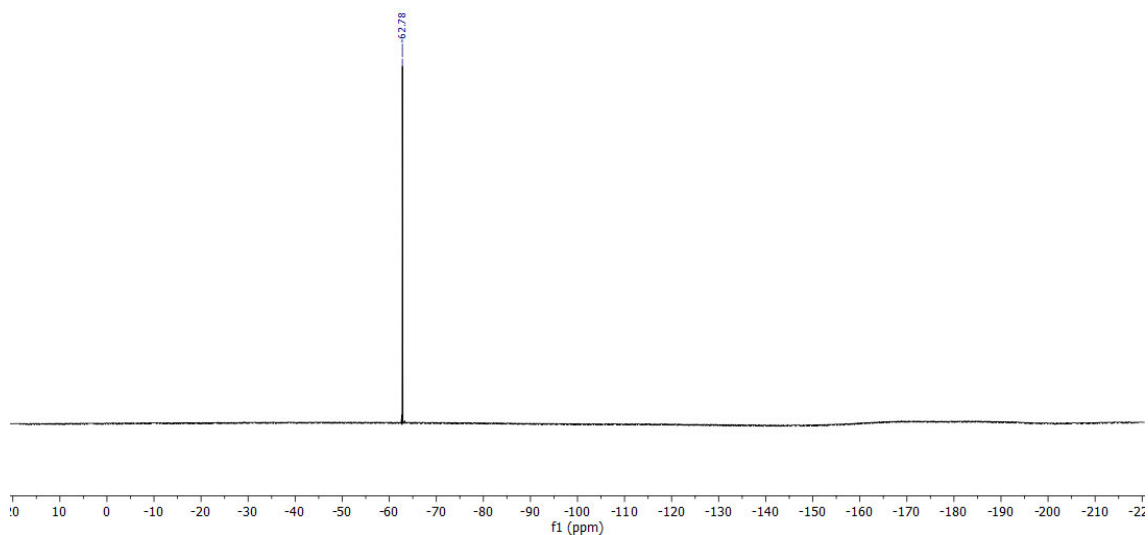

**Figure S67.**  $^{19}\text{F}$  NMR (376 MHz) spectrum of **3be** in  $\text{CDCl}_3$ .

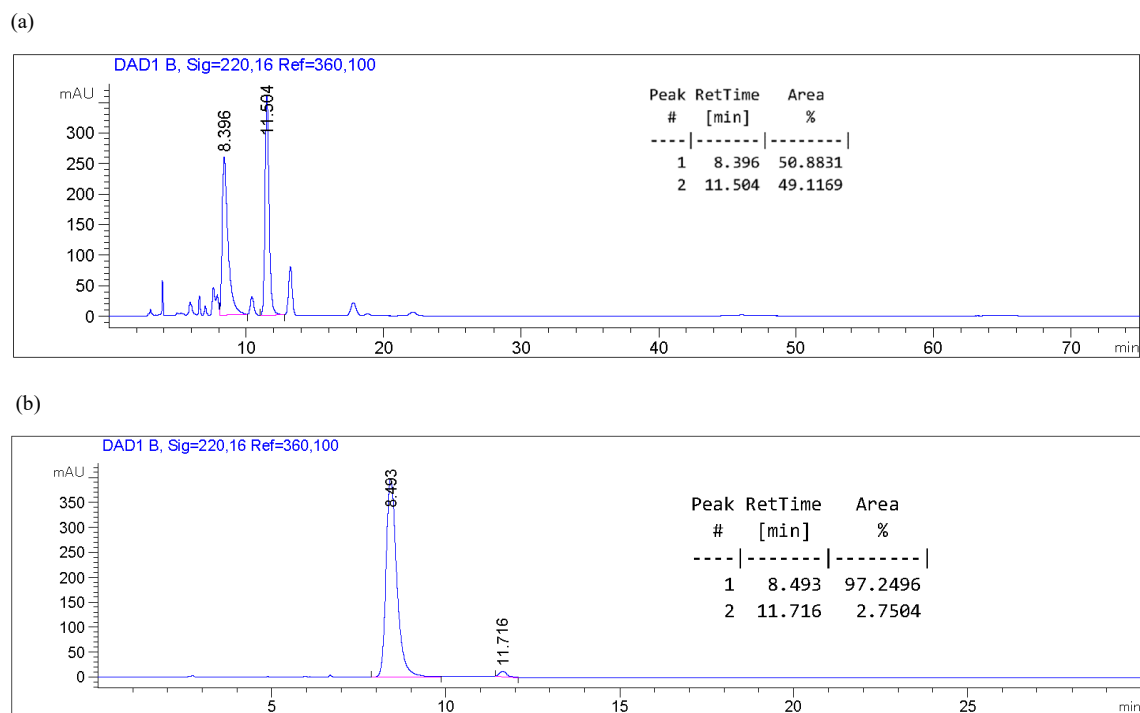

**Figure S68.** HPLC traces of (a) racemic and (b) enantioenriched product (*R,S*)-**3be**.

## Supporting Information

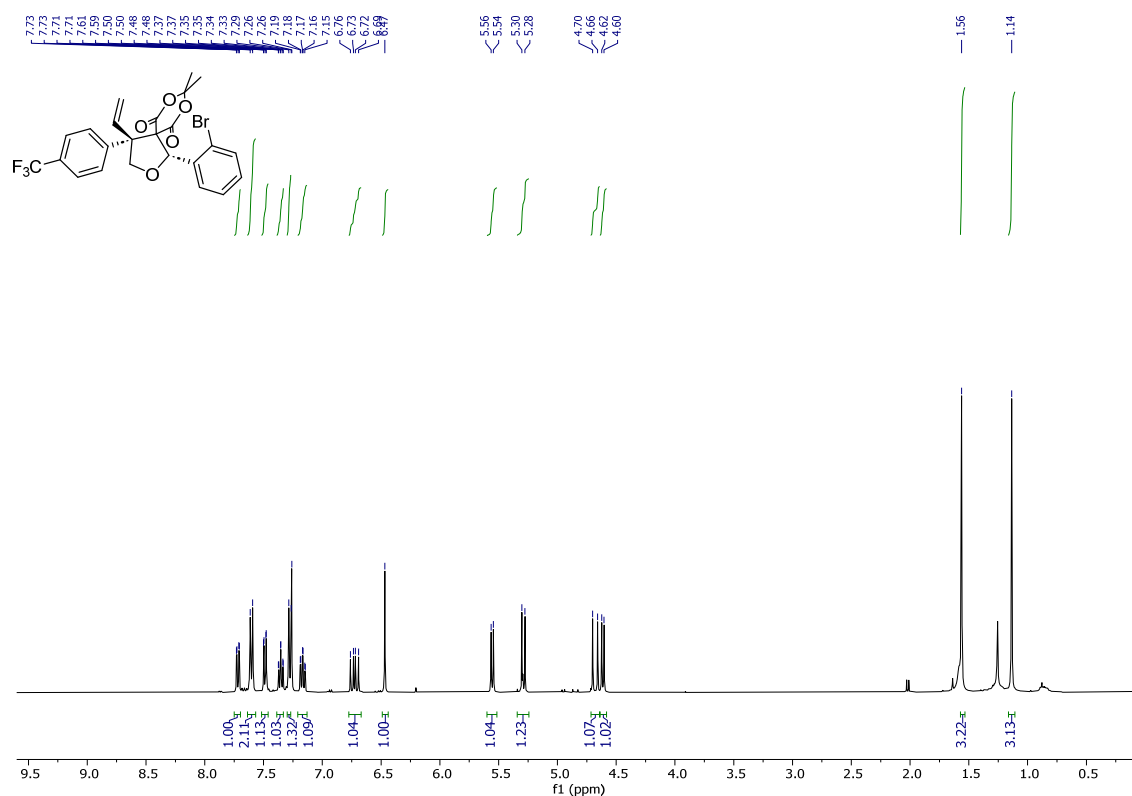

**Figure S69.** <sup>1</sup>H NMR (400 MHz) spectrum of 4-(4-(trifluoromethyl)phenyl)-8,8-dimethyl-1-(2-bromophenyl)-4-vinyl-2,7,9-trioxaspiro[4.5]decane-6,10-dione (**3gd**) in CDCl<sub>3</sub>.

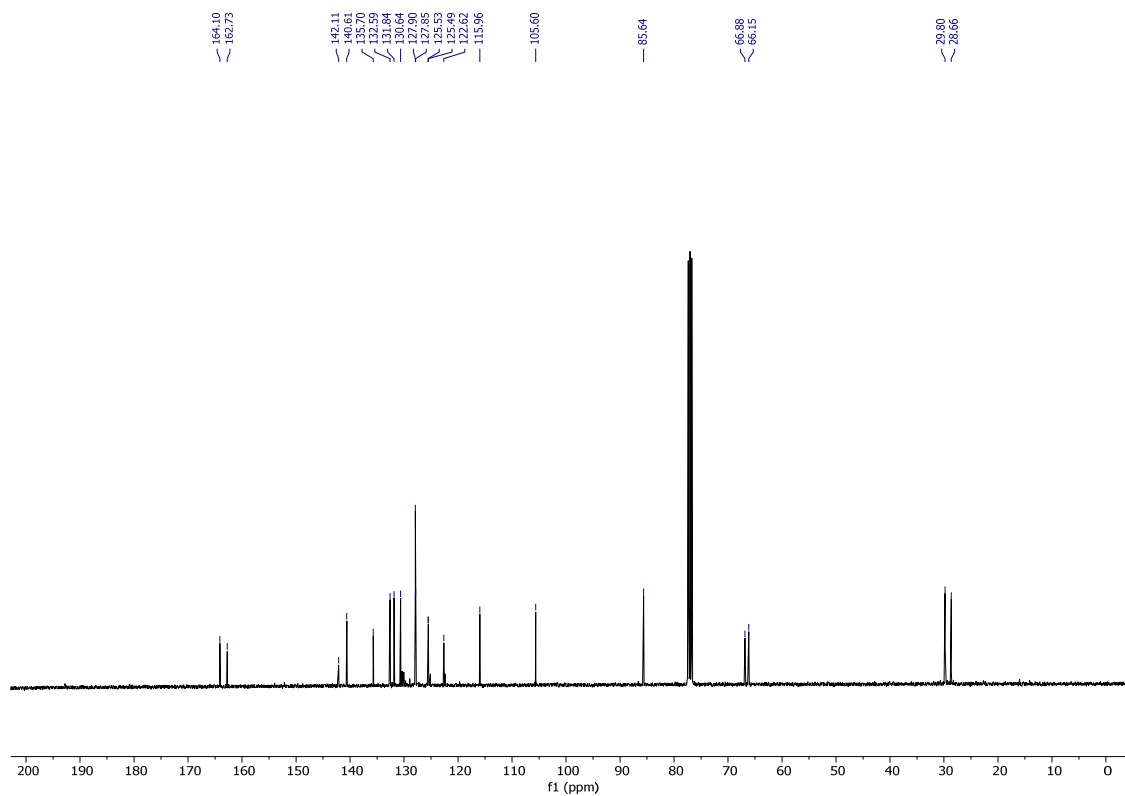

**Figure S70.** <sup>13</sup>C NMR (100.6 MHz) spectrum of **3gd** in CDCl<sub>3</sub>.

## Supporting Information

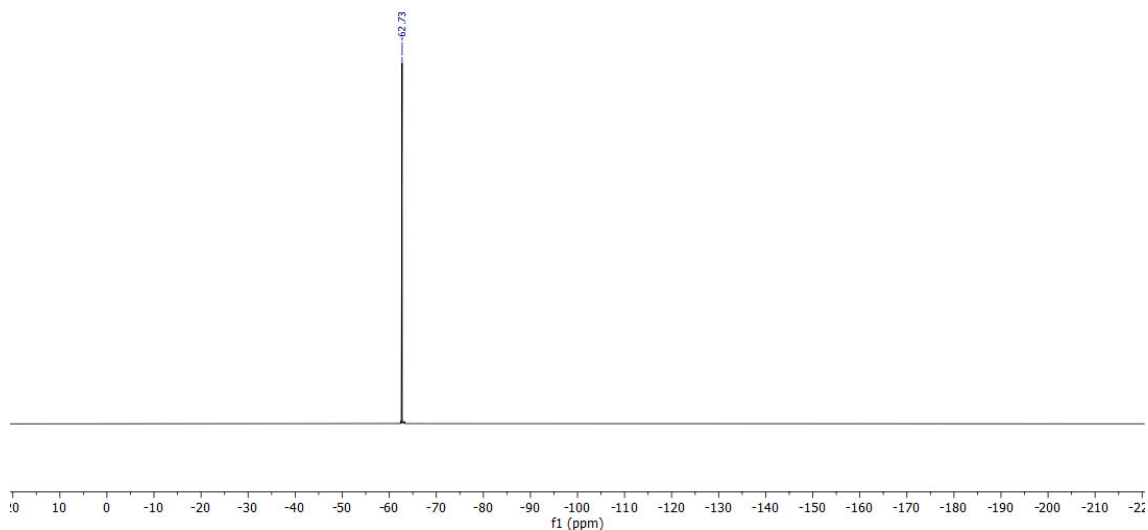

**Figure S71.**  $^{19}\text{F}$  NMR (376 MHz) spectrum of **3ba** in  $\text{CDCl}_3$ .

(a)

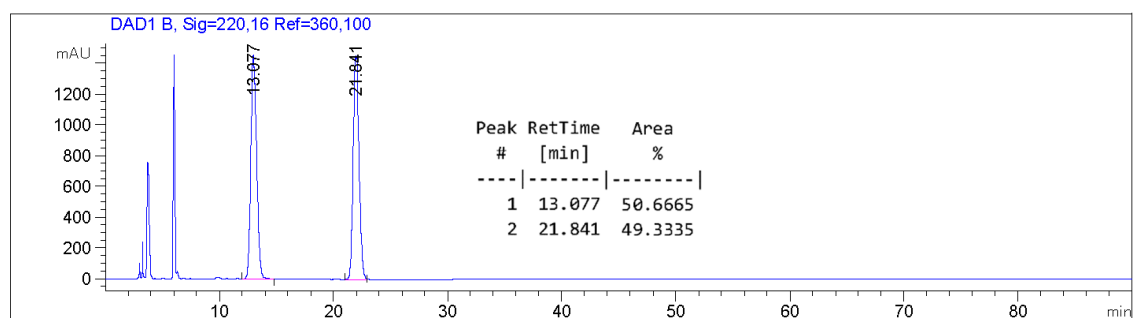

(b)

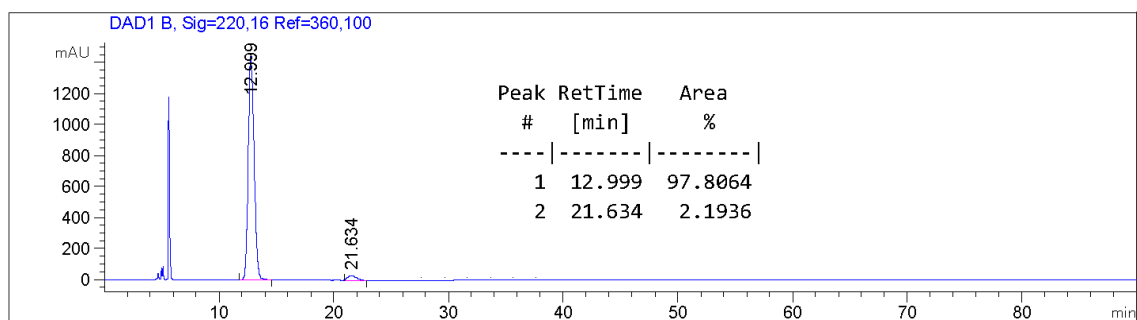

**Figure S72.** HPLC traces of (a) racemic and (b) enantioenriched product (*R,S*)-**3gd**.

## Supporting Information

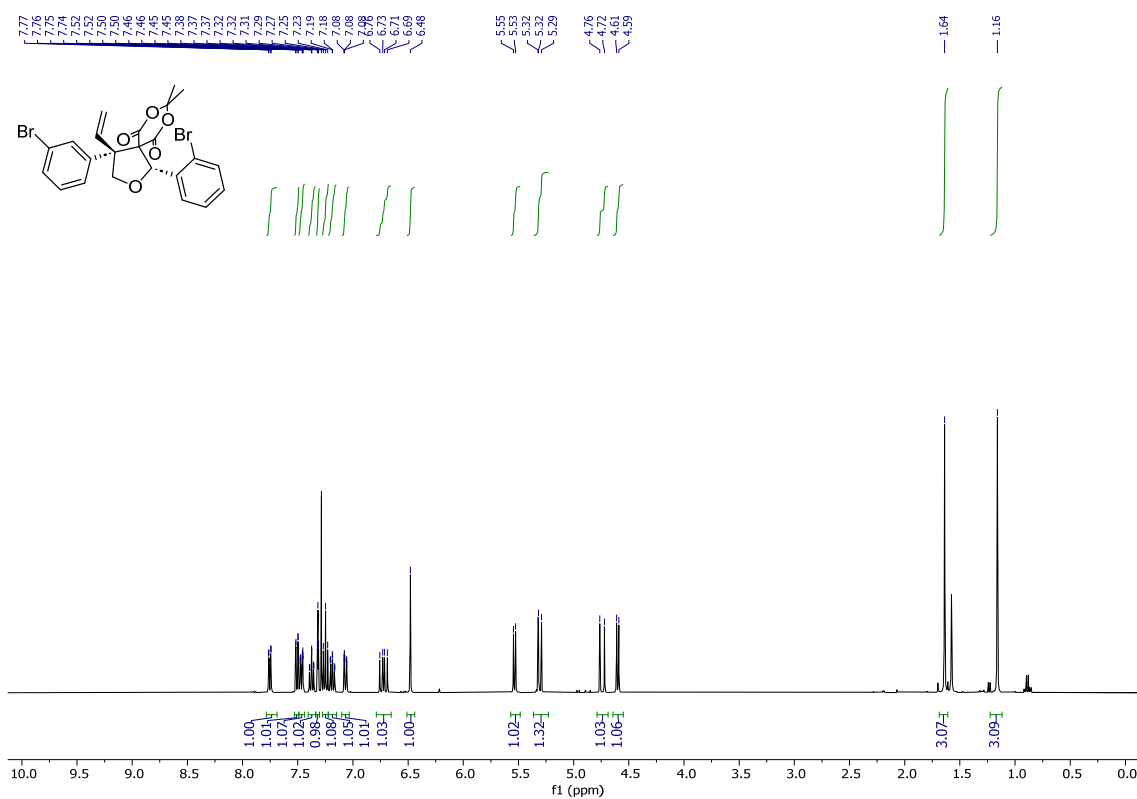

**Figure S73.** <sup>1</sup>H NMR (400 MHz) spectrum of 4-(3-bromophenyl)-8,8-dimethyl-1-(2-bromophenyl)-4-vinyl-2,7,9-trioxaspiro[4.5]decane-6,10-dione (**3gf**) in CDCl<sub>3</sub>.

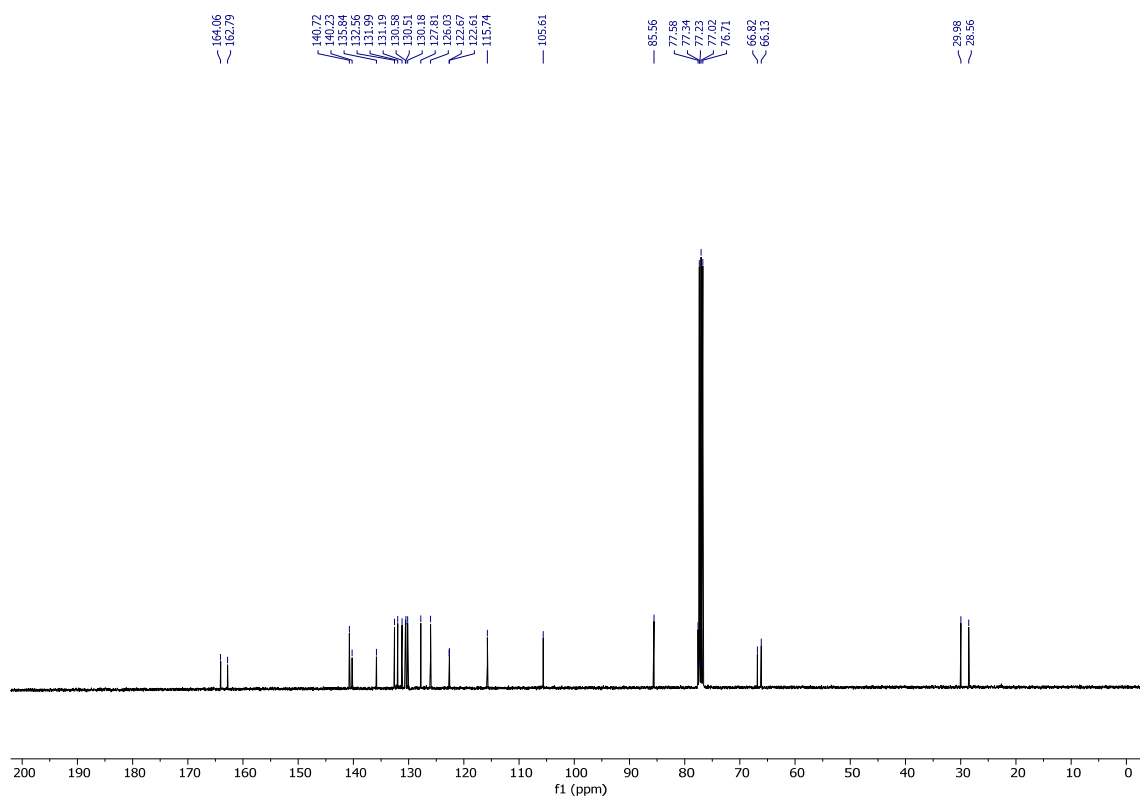

**Figure S74.** <sup>13</sup>C NMR (100.6 MHz) spectrum of **3gf** in CDCl<sub>3</sub>.

## Supporting Information

(a)

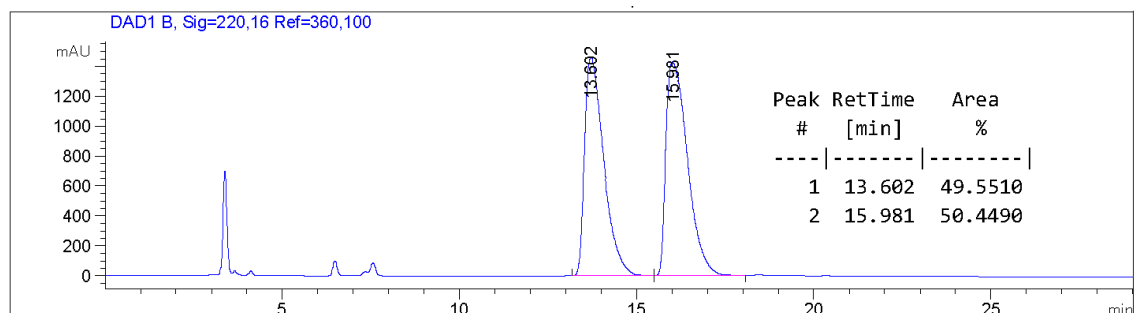

(b)

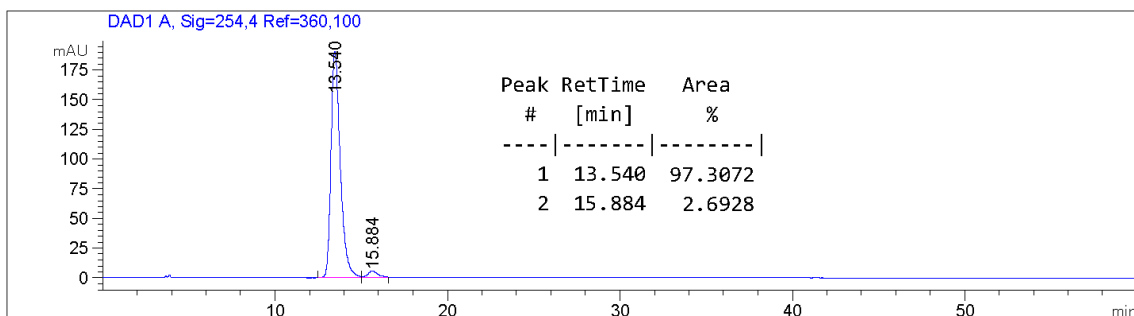

**Figure S75.** HPLC traces of (a) racemic and (b) enantioenriched product (*R,S*)-**3gf**.



## Supporting Information

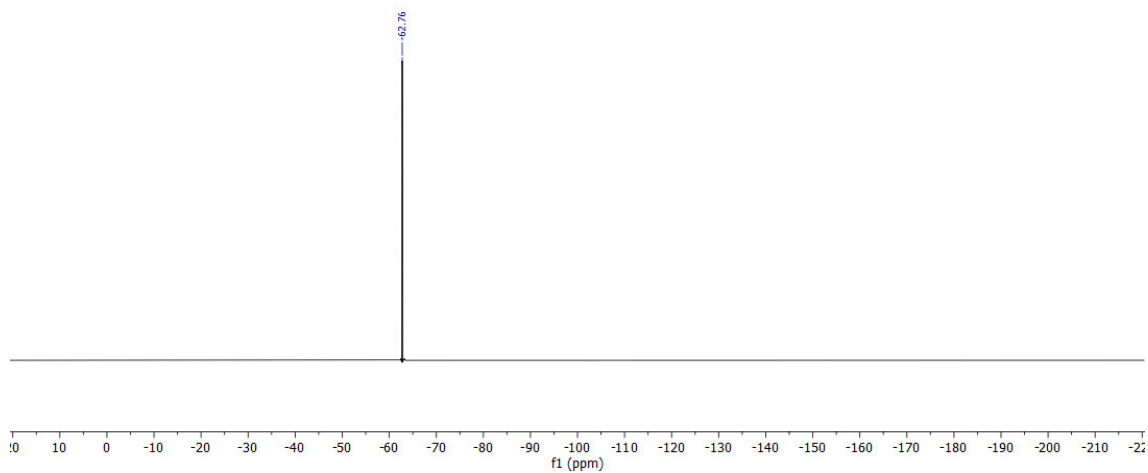

**Figure S78.**  $^{19}\text{F}$  NMR (376 MHz) spectrum of **3bg** in  $\text{CDCl}_3$ .

(a)

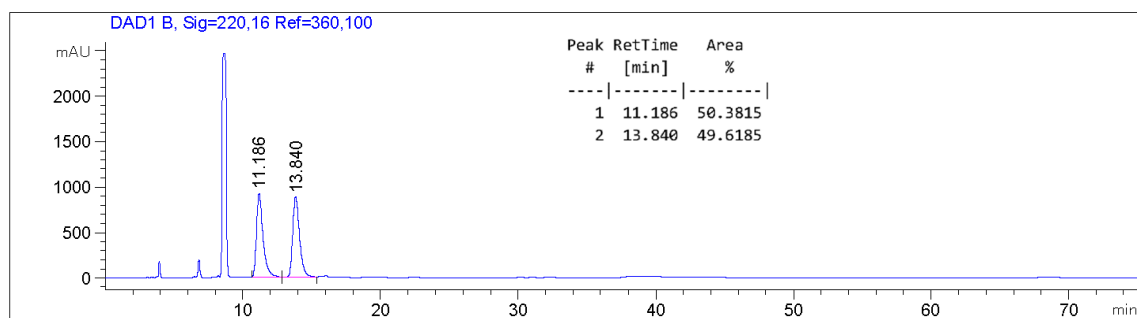

(b)

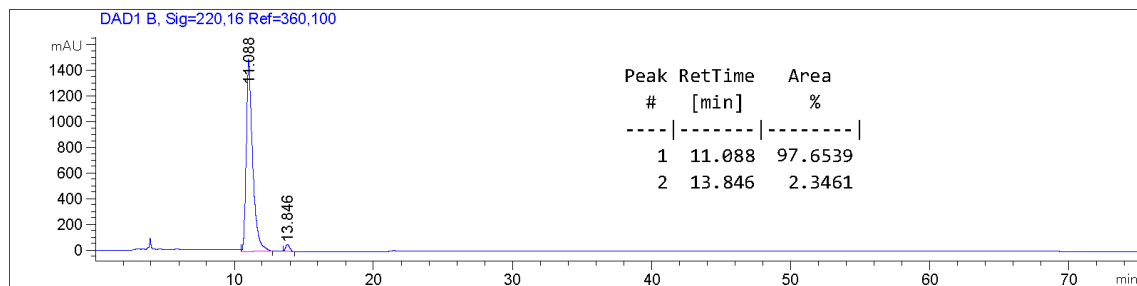

**Figure S79.** HPLC traces of (a) racemic and (b) enantioenriched product **3bg**.

## Supporting Information

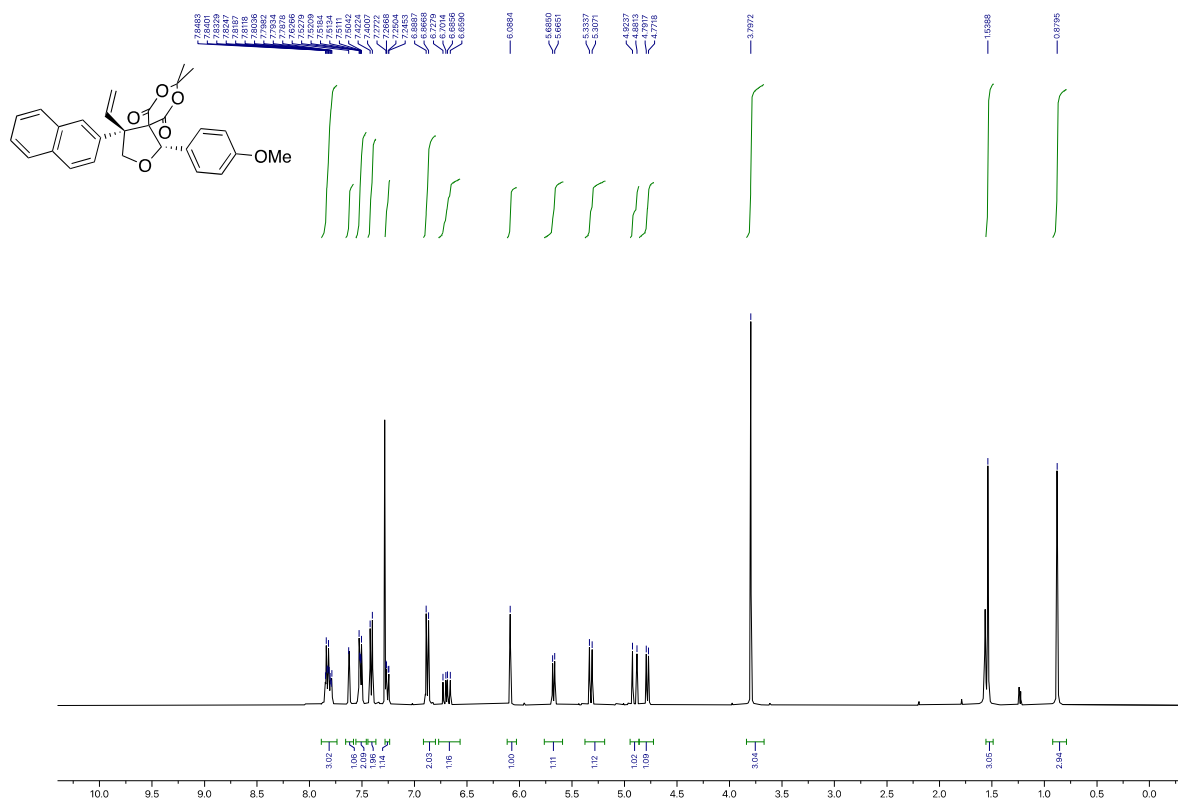

**Figure S80.**  $^1\text{H}$  NMR (400 MHz) spectrum of 1-(4-methoxyphenyl)-8,8-dimethyl-4-(naphthalen-2-yl)-2,7,9-trioxaspiro[4.5]decane-6,10-dione (**3ah**) in  $\text{CDCl}_3$ .

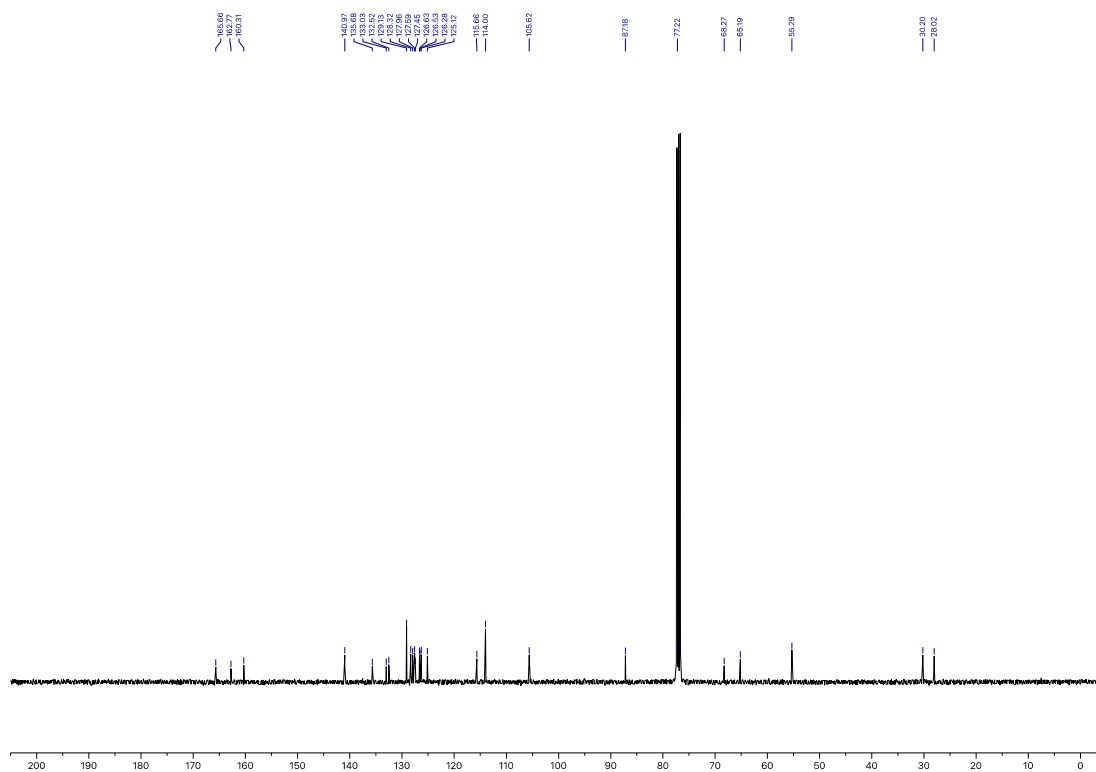

**Figure S81.**  $^{13}\text{C}$  NMR (100.6 MHz) spectrum of **3ah** in  $\text{CDCl}_3$ .

## Supporting Information

(a)

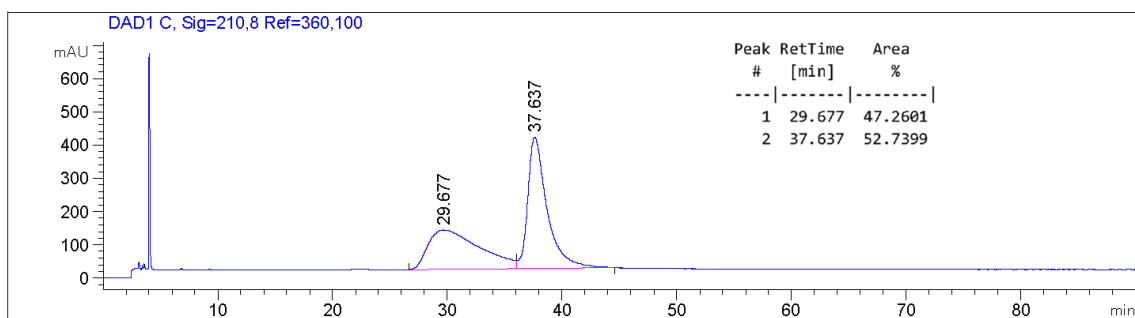

(b)

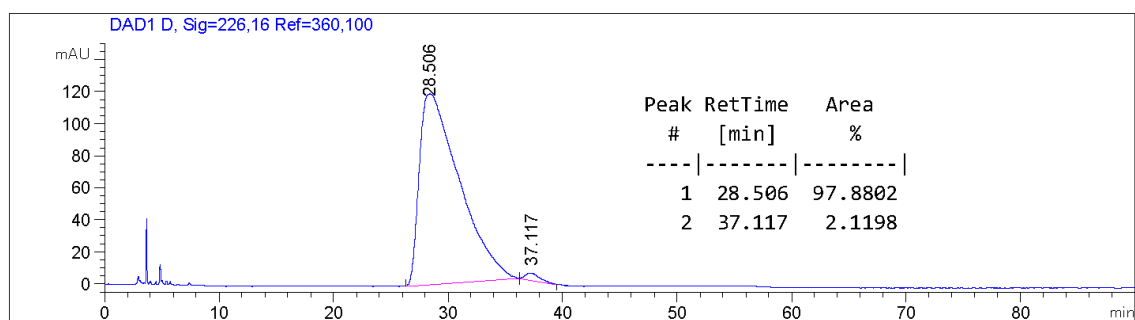

**Figure S82.** HPLC traces of (a) racemic and (b) enantioenriched product (*R,S*)-**3ah**.

## Supporting Information

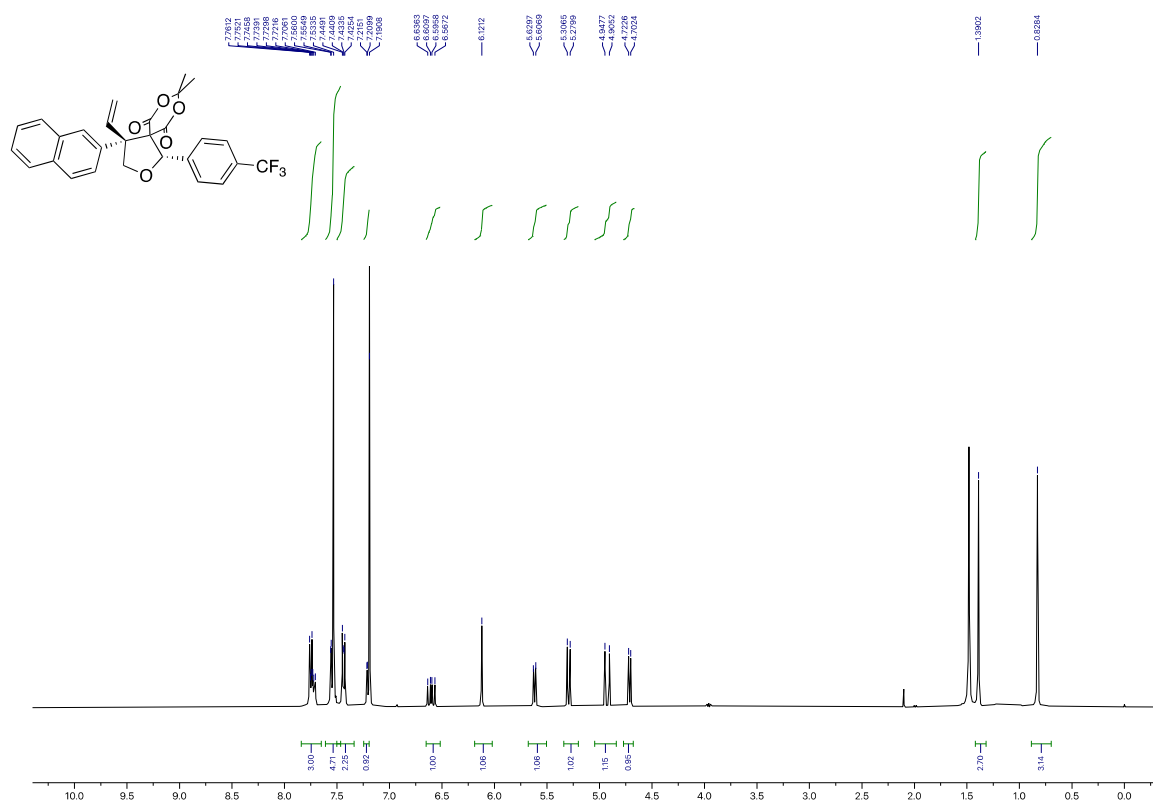

## Supporting Information

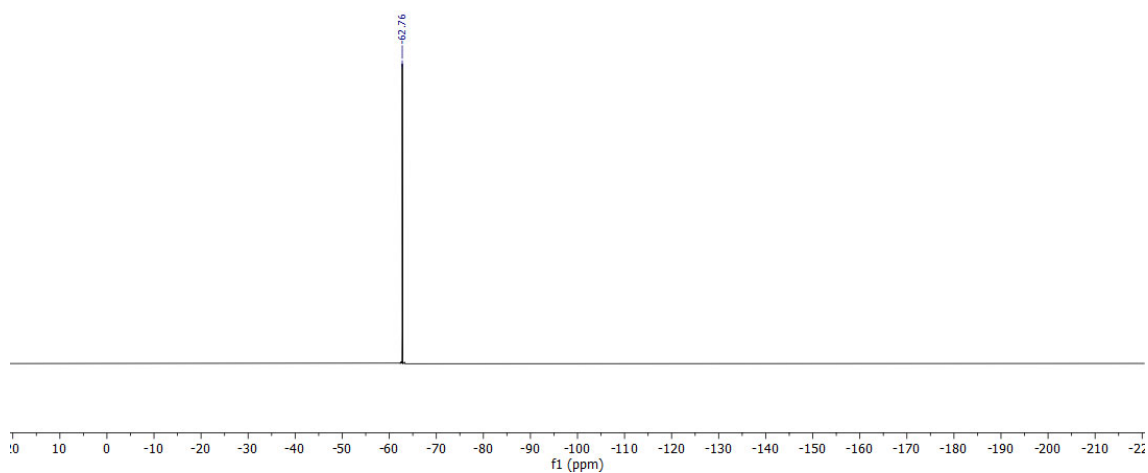

**Figure S85.**  $^{19}\text{F}$  NMR (376 MHz) spectrum of **3bh** in  $\text{CDCl}_3$ .

(a)

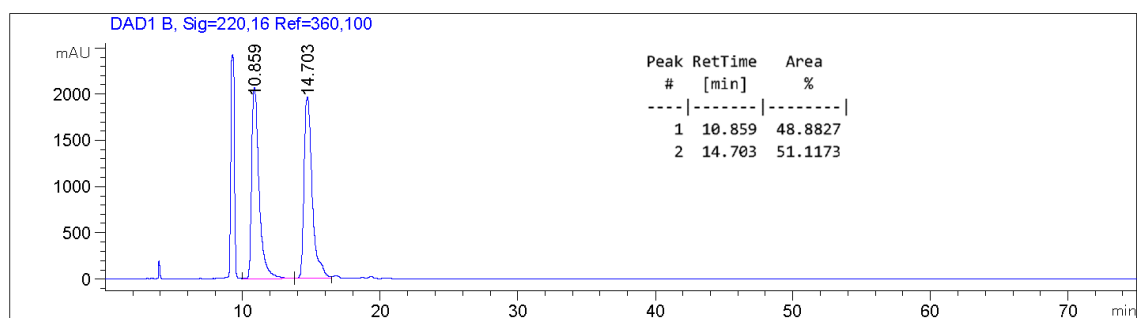

(b)

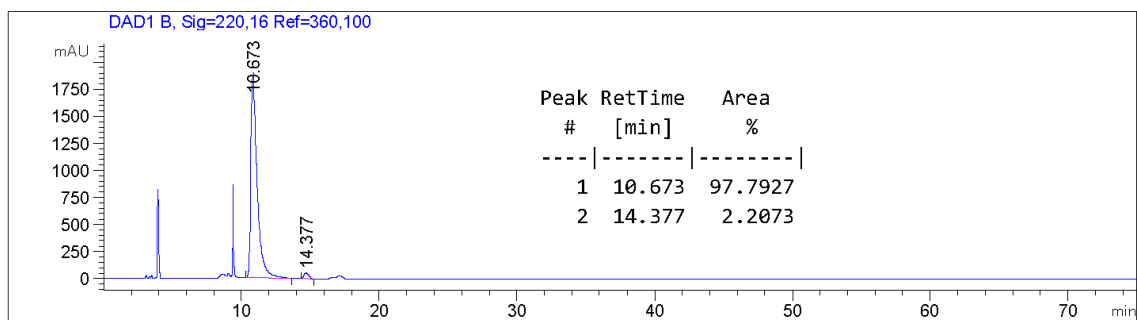

**Figure S86.** HPLC traces of (a) racemic and (b) enantioenriched product (*R,S*)-**3bh**.

## Supporting Information

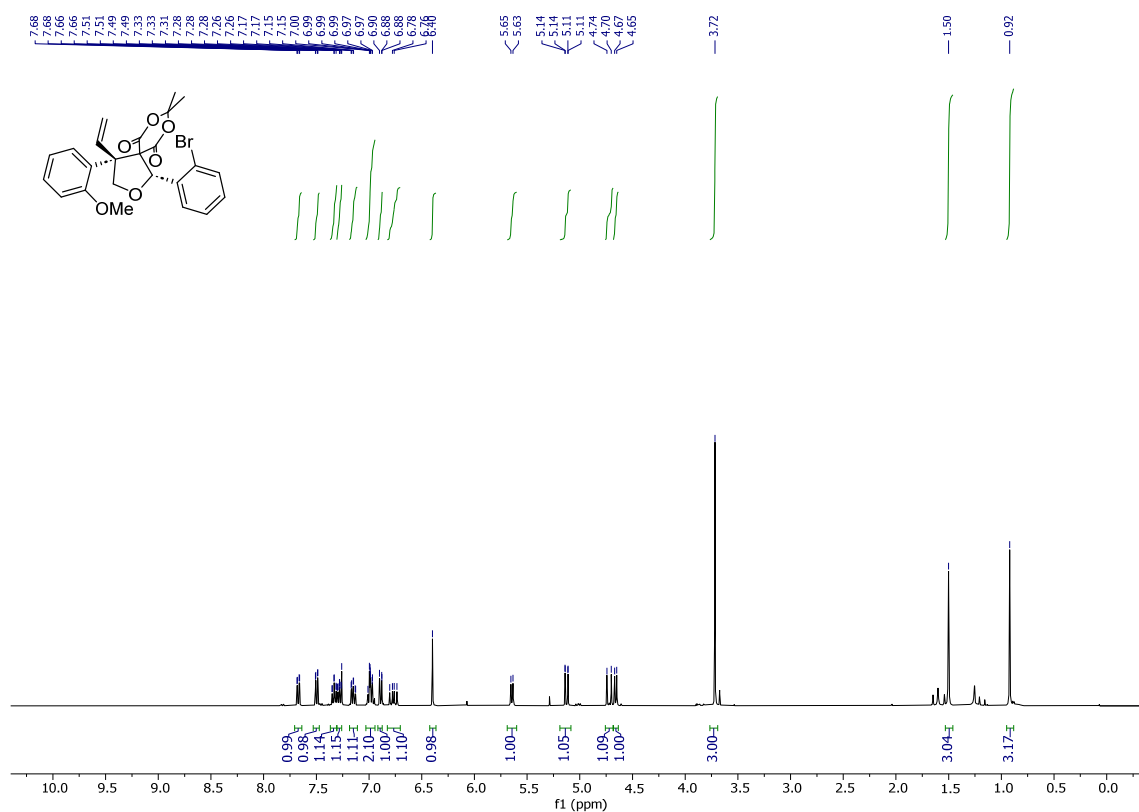

**Figure S87.** <sup>1</sup>H NMR (400 MHz) spectrum of 4-(2-methoxyphenyl)-8,8-dimethyl-1-(2-bromophenyl)-4-vinyl-2,7,9-trioxaspiro[4.5]decane-6,10-dione (**3gi**) in CDCl<sub>3</sub>.

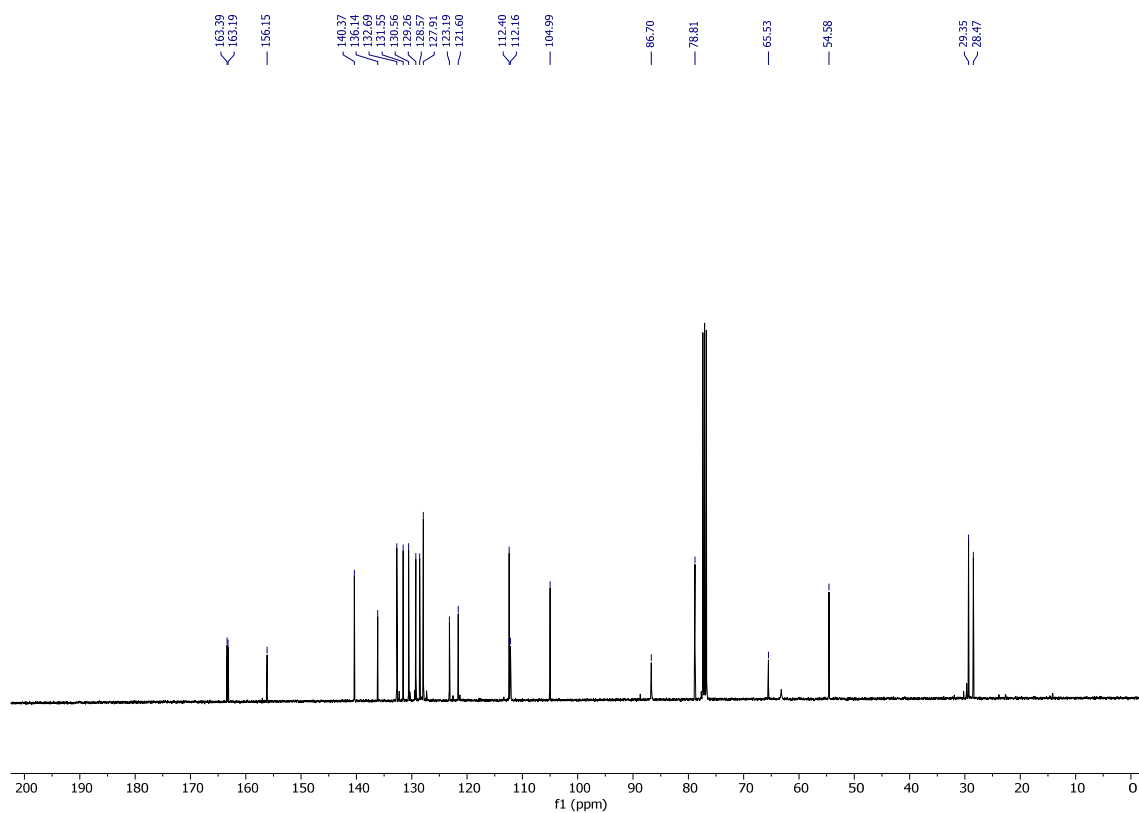

**Figure S88.** <sup>13</sup>C NMR (100.6 MHz) spectrum of **3gi** in CDCl<sub>3</sub>.

## Supporting Information

(a)

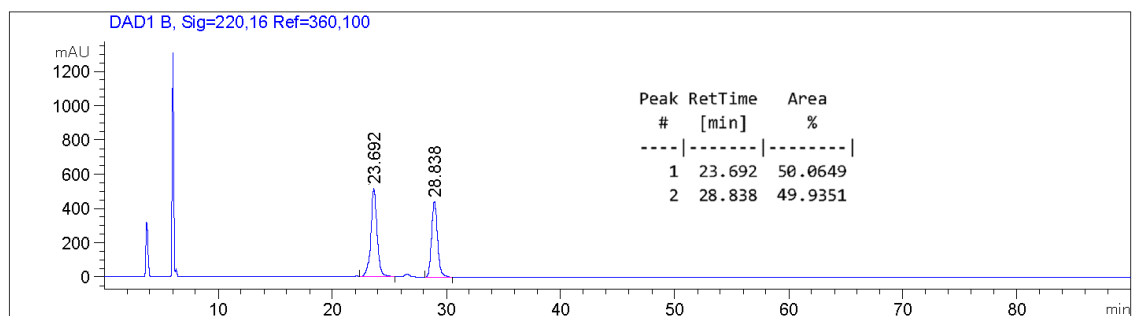

(b)

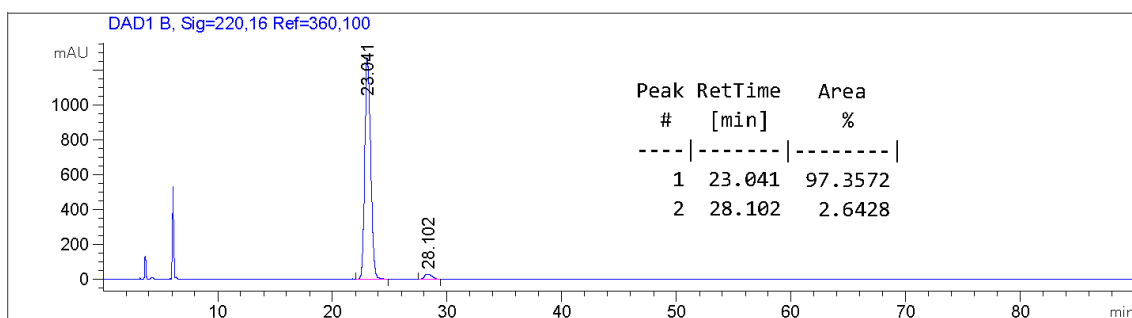

**Figure S89.** HPLC traces of (a) racemic and (b) enantioenriched product (*R,S*)-**3gi**.

## Supporting Information

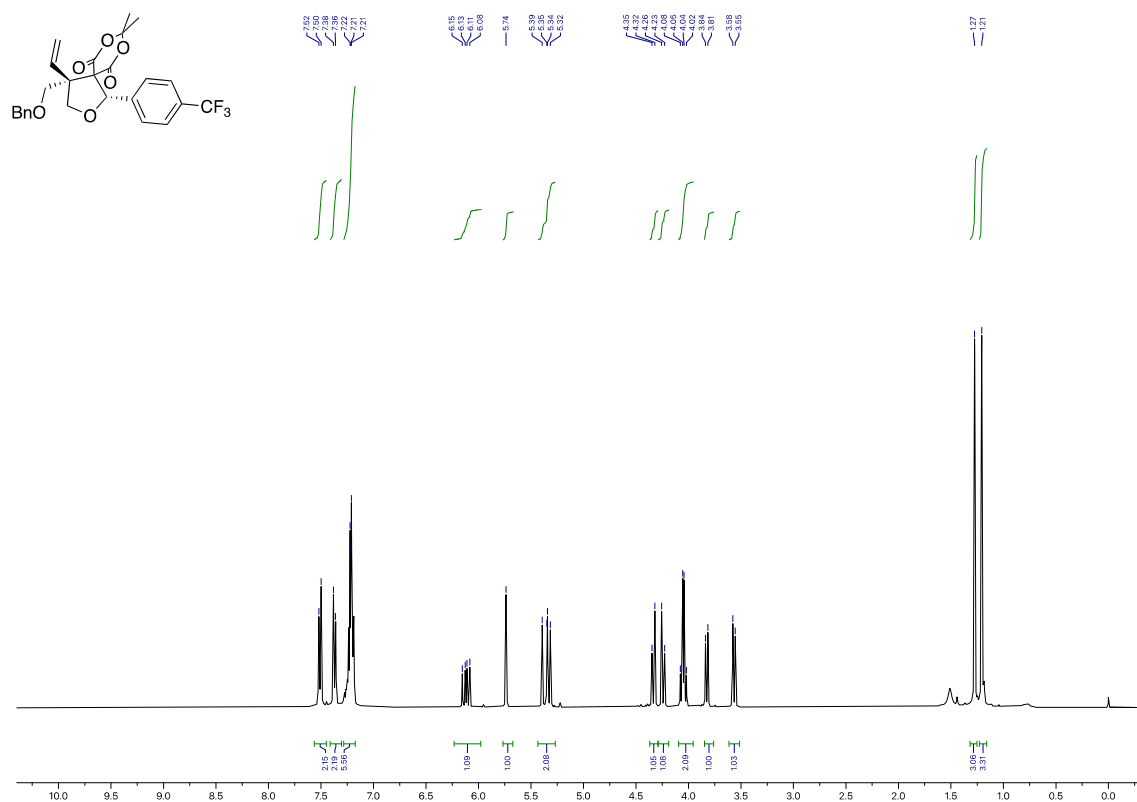

**Figure S90.**  $^1\text{H}$  NMR (400 MHz) spectrum of 4-((benzyloxy)methyl)-8,8-dimethyl-1-(4-(trifluoromethyl)phenyl)-4-vinyl-2,7,9-trioxaspiro[4.5]decane-6,10-dione (**3bj**) in  $\text{CDCl}_3$

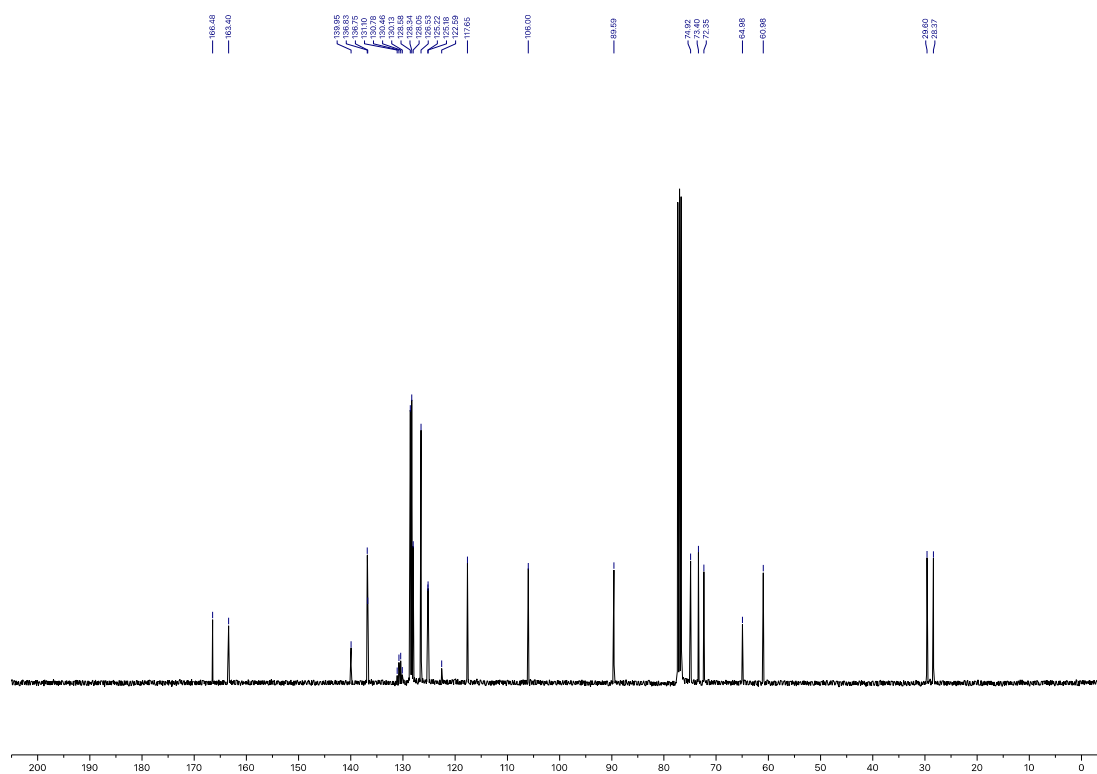

**Figure S91.**  $^{13}\text{C}$  NMR (100.6 MHz) spectrum of **3bj** in  $\text{CDCl}_3$ .

## Supporting Information

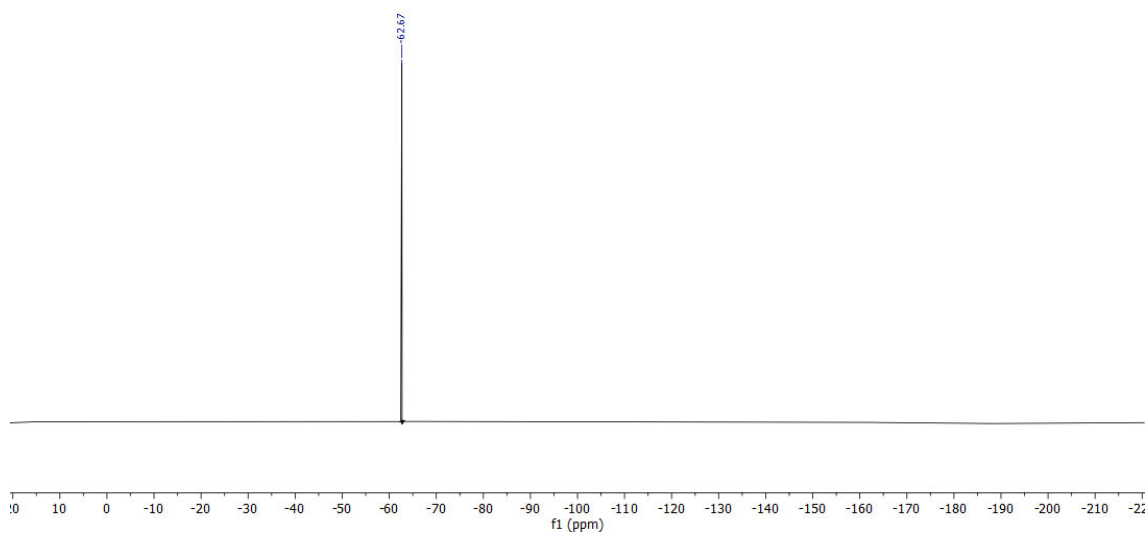

**Figure S92.**  $^{19}\text{F}$  NMR (376 MHz) spectrum of **3bj** in  $\text{CDCl}_3$ .

(a)

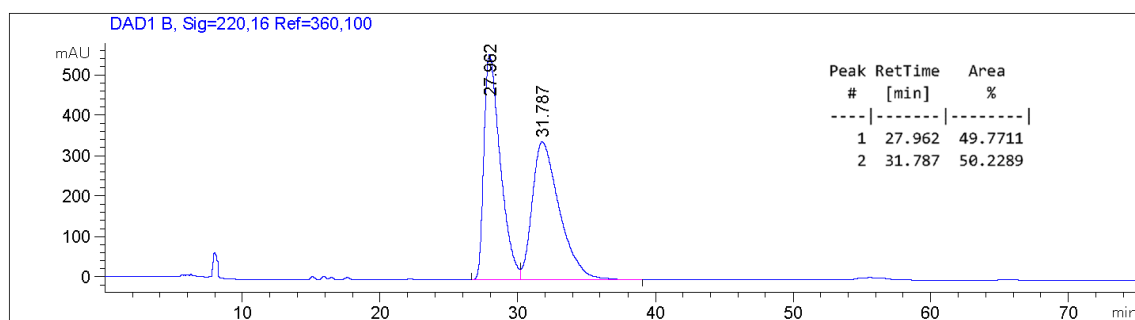

(b)

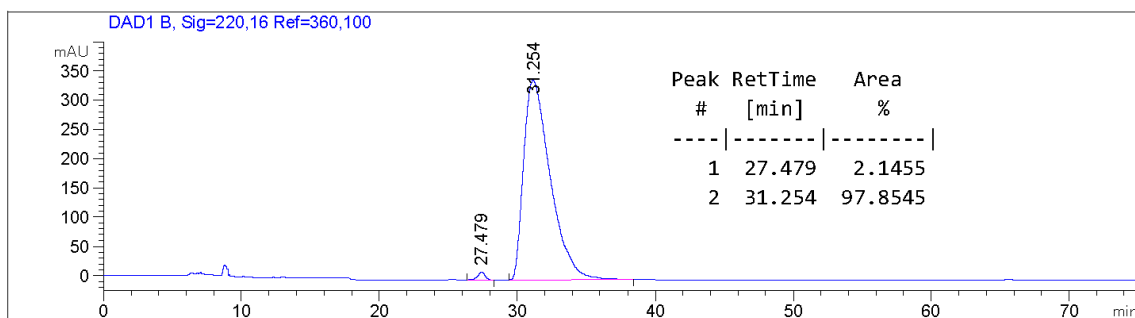

**Figure S93.** HPLC traces of (a) racemic and (b) enantioenriched product (*R,S*)-**3bj**.

## Supporting Information

### SI-17. Copies of NMR spectra of the Pd-intermediates formed under catalytic conditions

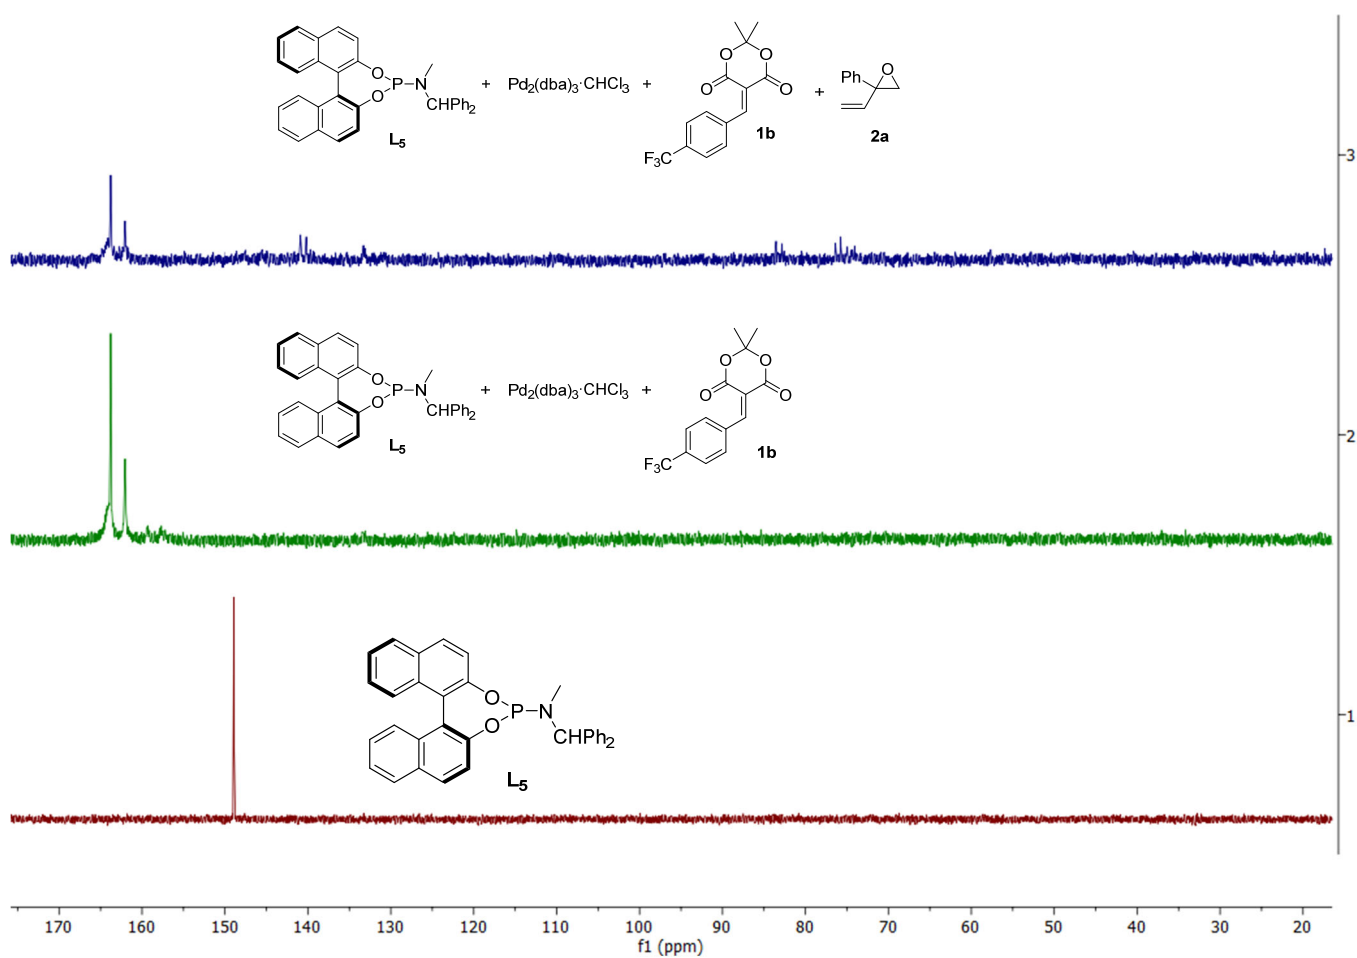

**Figure S100.**  $^{31}\text{P}\{^1\text{H}\}$  NMR spectra of  $\text{L}_5$  in red, of a mixture of  $\text{Pd}_2(\text{dba})_3 \cdot \text{CHCl}_3 + \text{L}_5$  (2 equiv) +  $\mathbf{1b}$  (10 equiv) (in green) and of a mixture of  $\text{Pd}_2(\text{dba})_3 \cdot \text{CHCl}_3 + \text{L}_5$  (2 equiv) +  $\mathbf{1b}$  (10 equiv) and  $\mathbf{2a}$  (15 equiv) during the reaction (in blue).

## Supporting Information

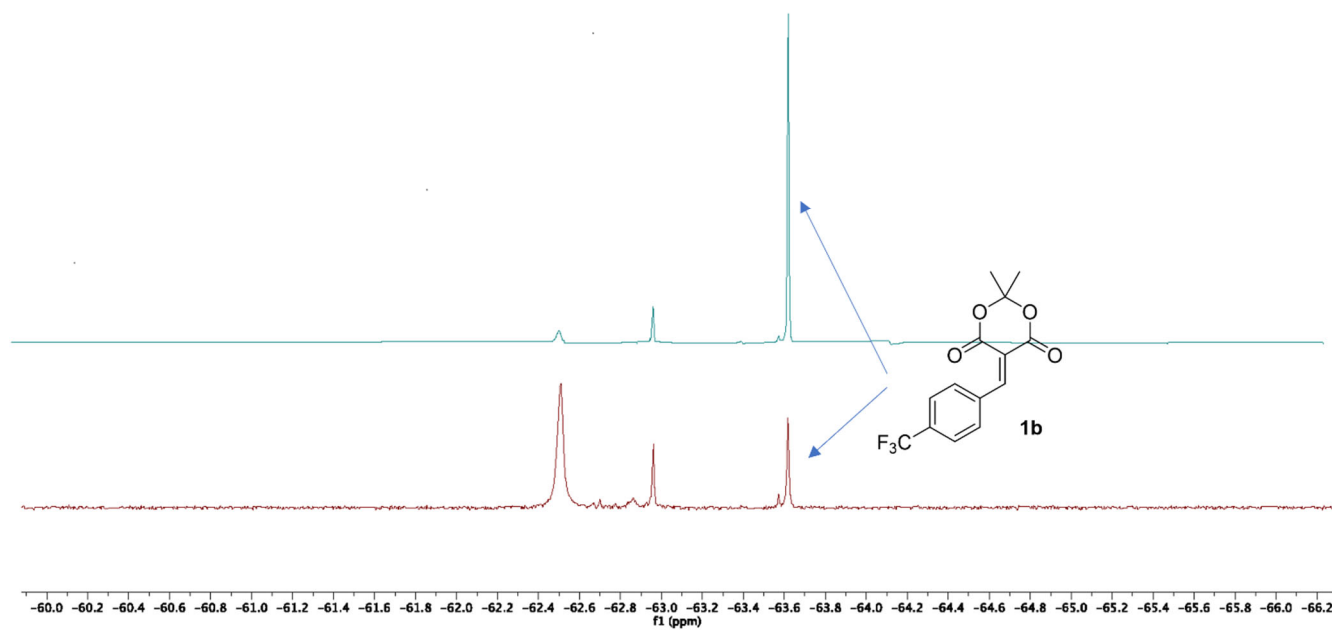

**Figure S101.**  $^{19}\text{F}\{^1\text{H}\}$  NMR spectra of a mixture of  $\text{Pd}_2(\text{dba})_3 \cdot \text{CHCl}_3 + \text{L}_5$  (2 equiv) + **1b** (20 equiv) (in green) and of a mixture of  $\text{Pd}_2(\text{dba})_3 \cdot \text{CHCl}_3 + \text{L}_5$  (2 equiv) + **1b** (2 equiv) (in blue).

## Supporting Information

### SI-18. Copies of NMR spectra of PS-(*R*)-L<sub>5</sub> and its synthetic intermediates

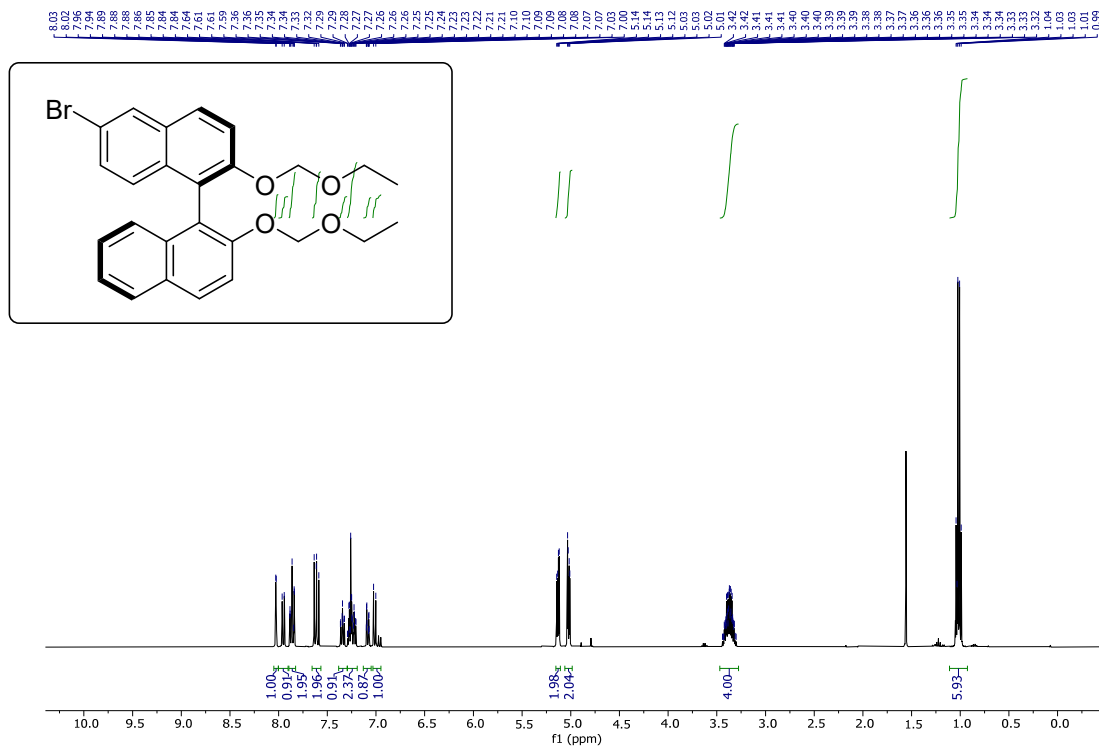

Figure S94. <sup>1</sup>H NMR spectra of (*R*)-6-bromo-2,2'-bis(ethoxymethoxy)-1,1'-binaphthalene (**5**) in CDCl<sub>3</sub>.

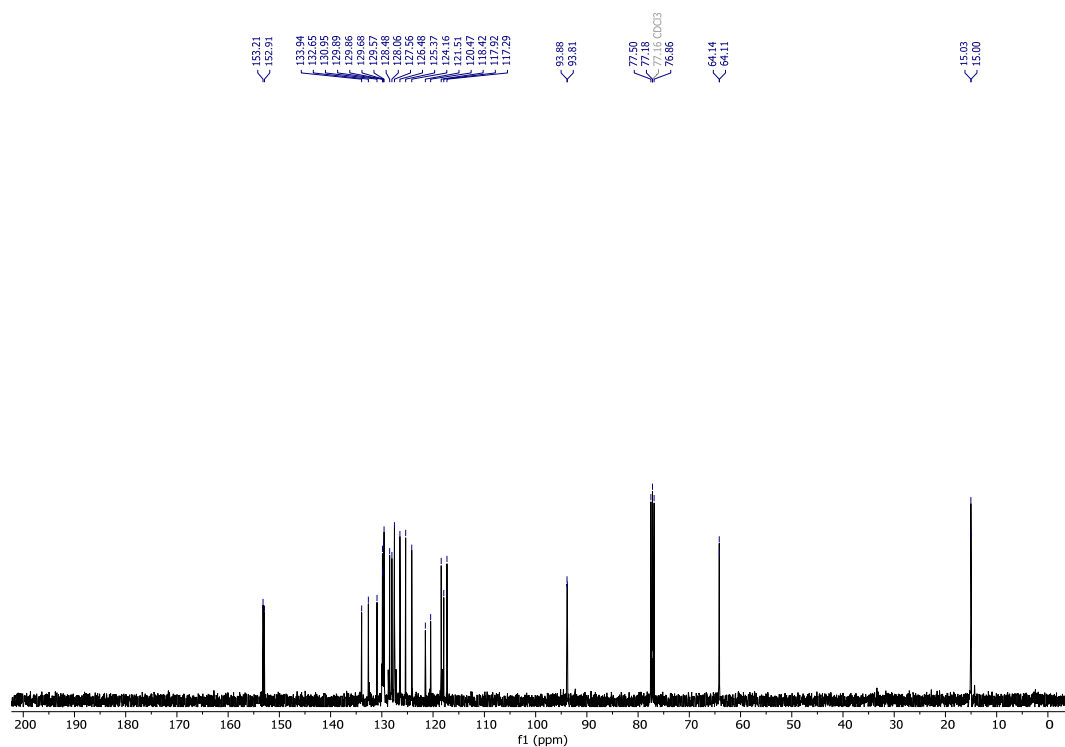

Figure S95. <sup>13</sup>C NMR spectra of (*R*)-6-bromo-2,2'-bis(ethoxymethoxy)-1,1'-binaphthalene (**5**) in CDCl<sub>3</sub>.

## Supporting Information

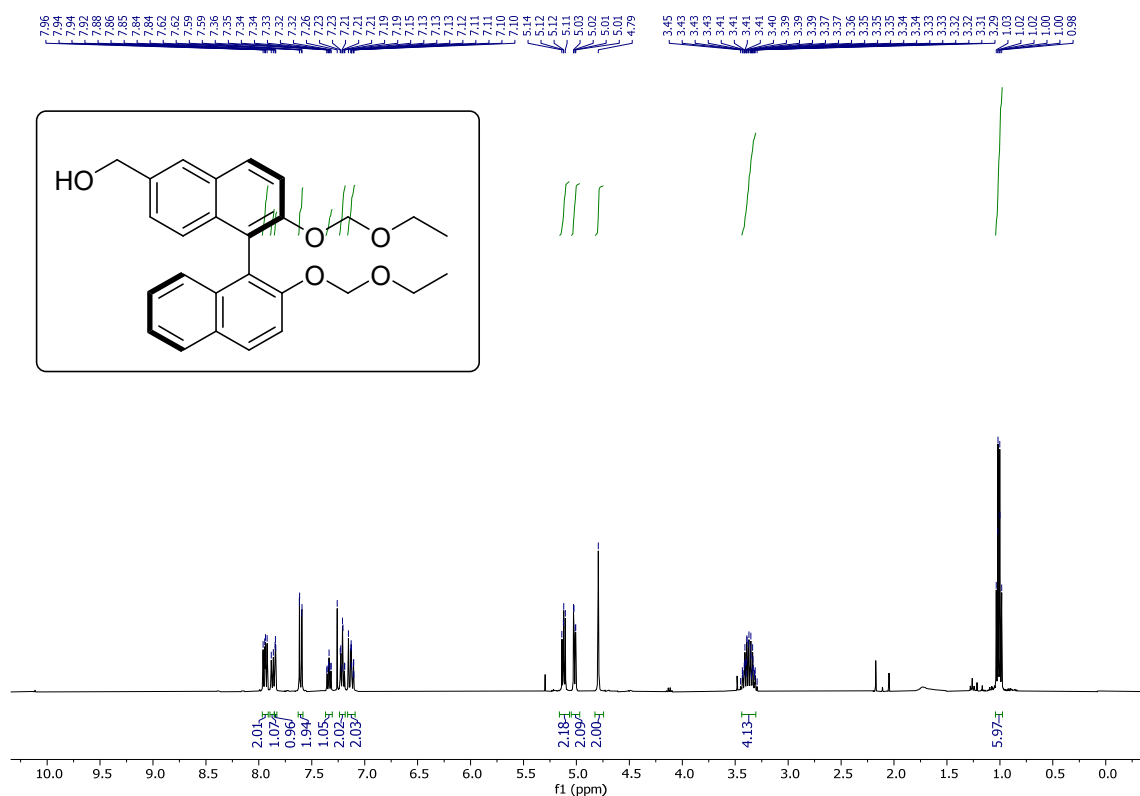

**Figure S96.** <sup>1</sup>H NMR spectra of *(R)*-(2,2'-bis(ethoxymethoxy)-[1,1'-binaphthalen]-6-yl)methanol in CDCl<sub>3</sub>.

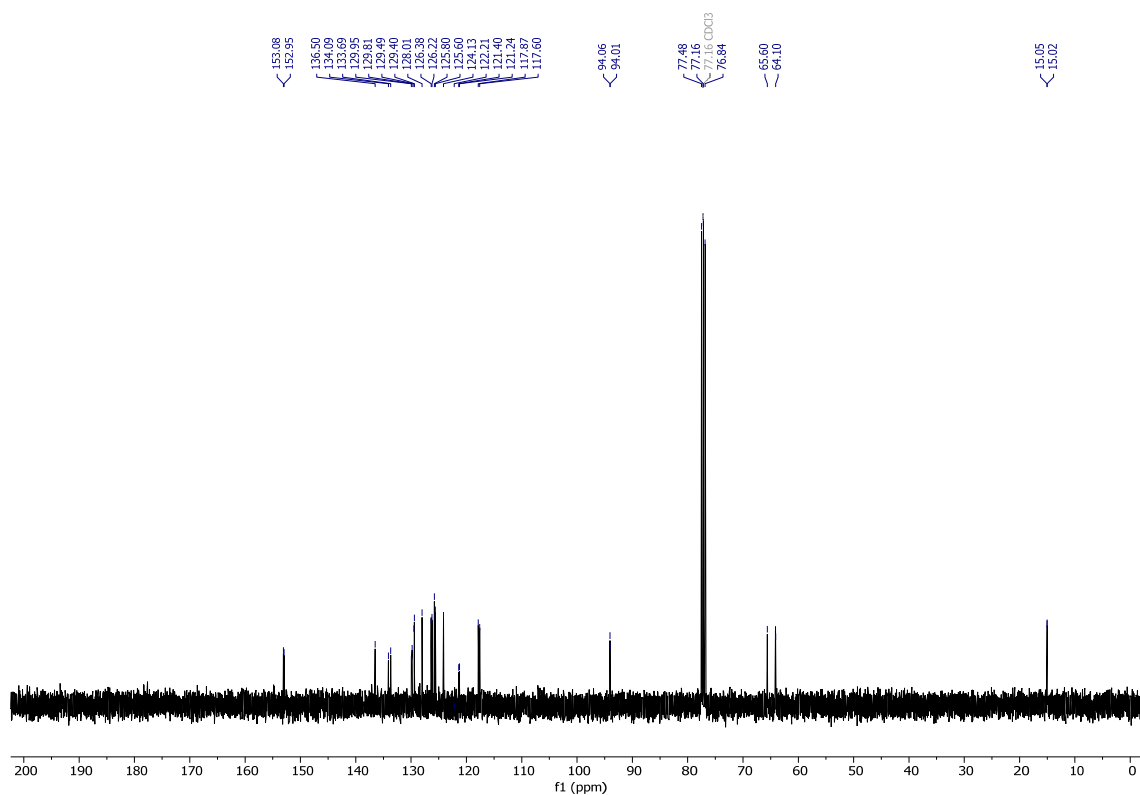

**Figure S97.** <sup>13</sup>C NMR spectra of *(R)*-(2,2'-bis(ethoxymethoxy)-[1,1'-binaphthalen]-6-yl)methanol in CDCl<sub>3</sub>.

## Supporting Information

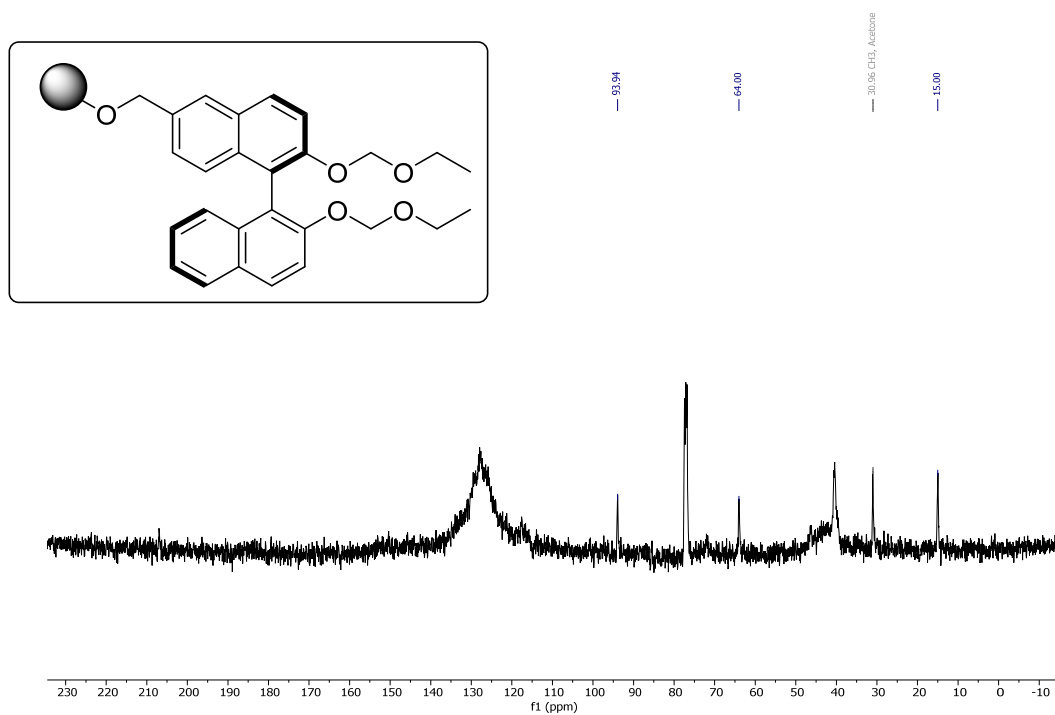

**Figure S98.** <sup>13</sup>C NMR spectra of PS-(*R*)-(2,2'-bis(ethoxymethoxy)-[1,1'-binaphthalen]-6-yl)methanol in CDCl<sub>3</sub>.

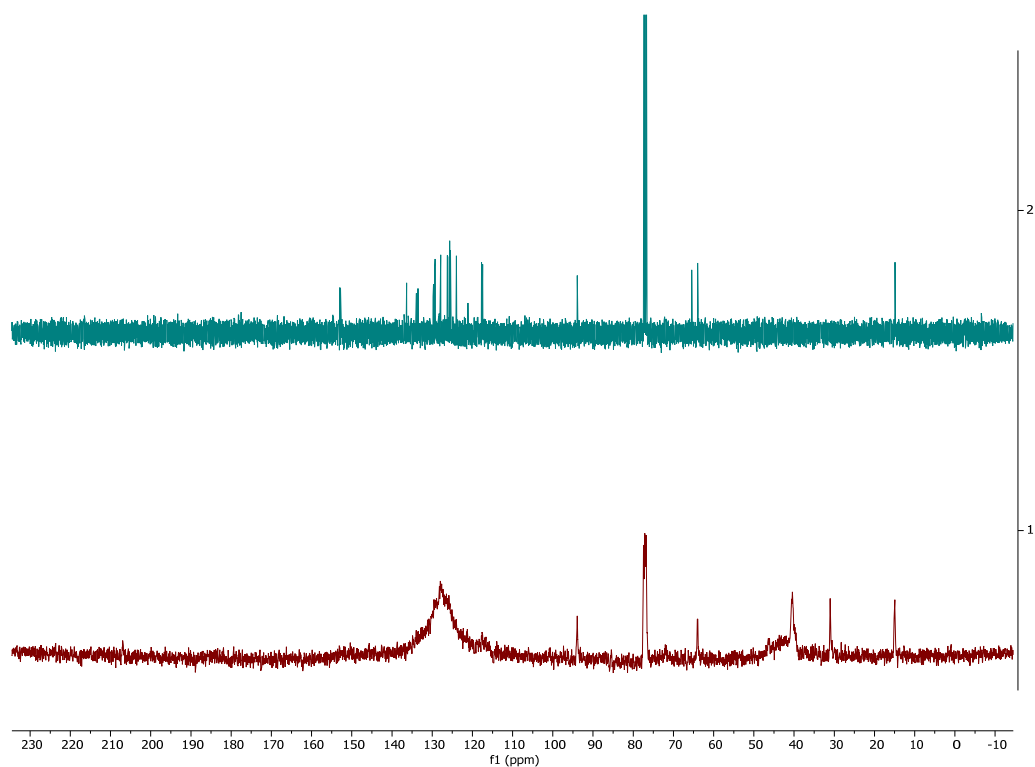

**Figure S99.** <sup>13</sup>C NMR spectra comparison of PS-(*R*)-(2,2'-bis(ethoxymethoxy)-[1,1'-binaphthalen]-6-yl)methanol and (*R*)-(2,2'-bis(ethoxymethoxy)-[1,1'-binaphthalen]-6-yl)methanol in CDCl<sub>3</sub>.

## Supporting Information

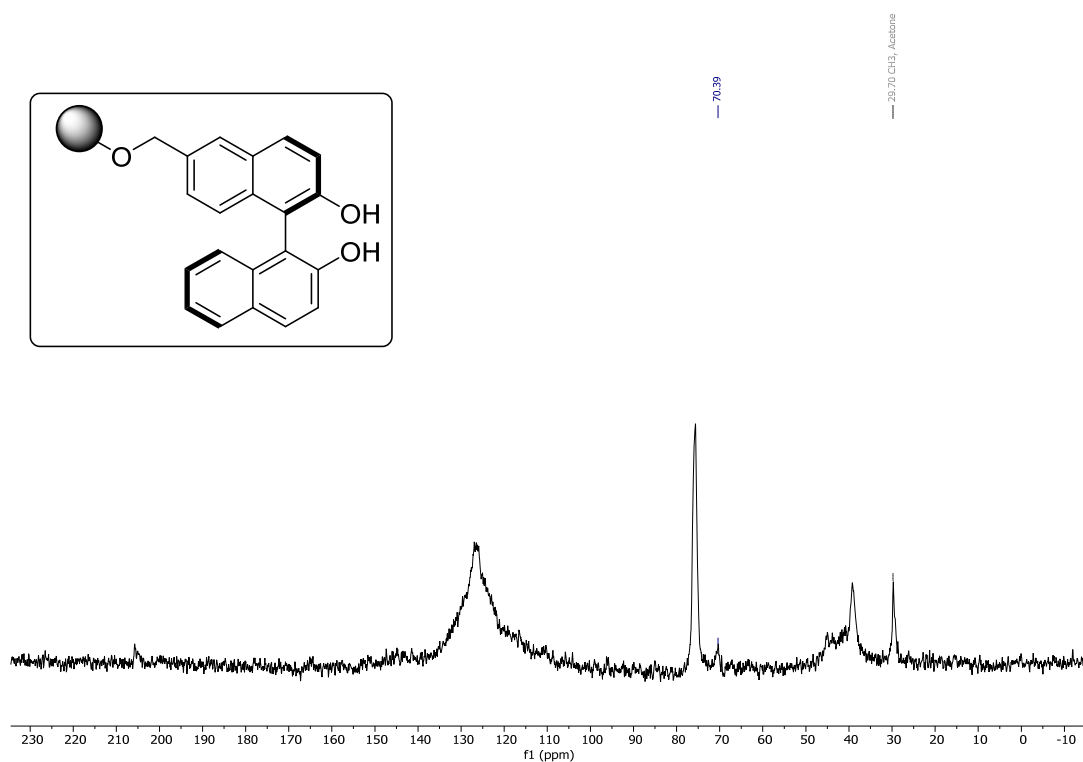

Figure S100.  $^{13}\text{C}$  NMR spectra of PS-(R)-4.

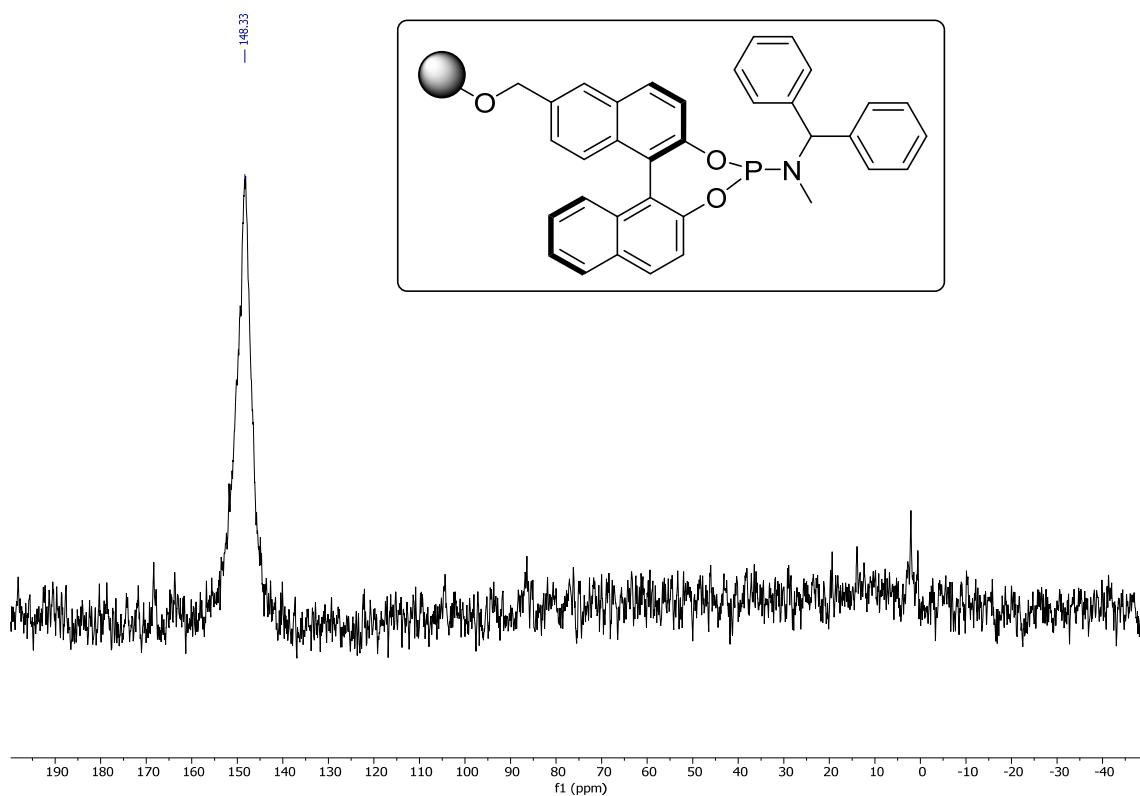

Figure S101.  $^{31}\text{P}$  NMR spectra of PS-(R)-L<sub>5</sub>.

## Supporting Information

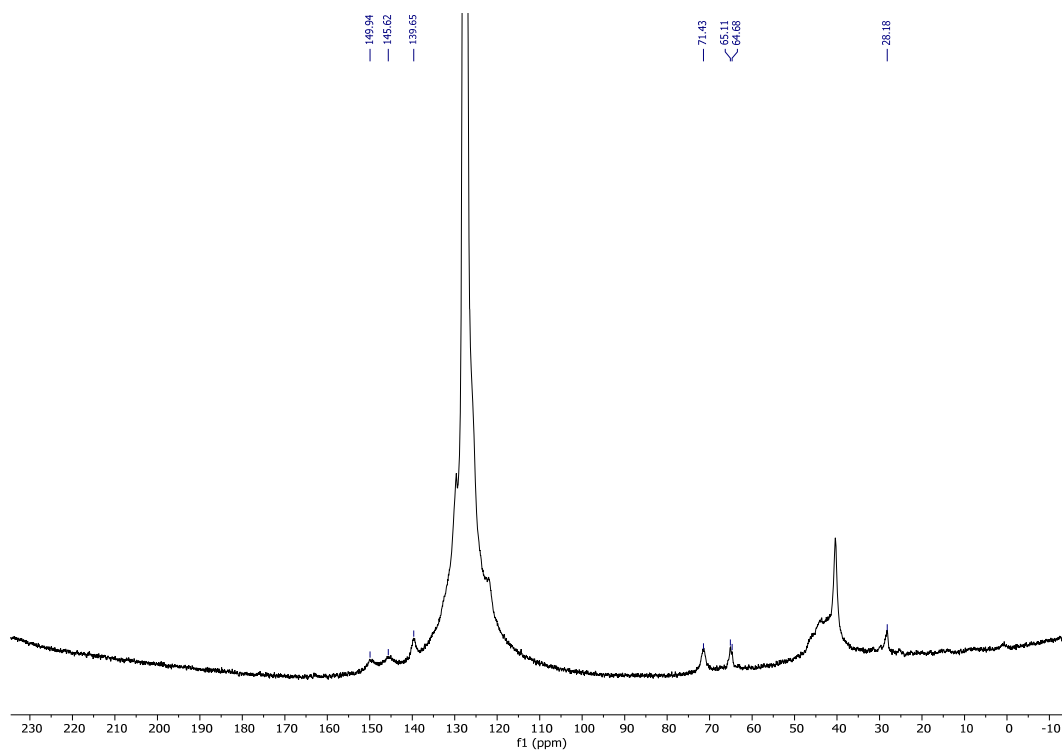

**Figure S102.**  $^{13}\text{C}$  NMR spectra of PS-(*R*)-L<sub>5</sub>

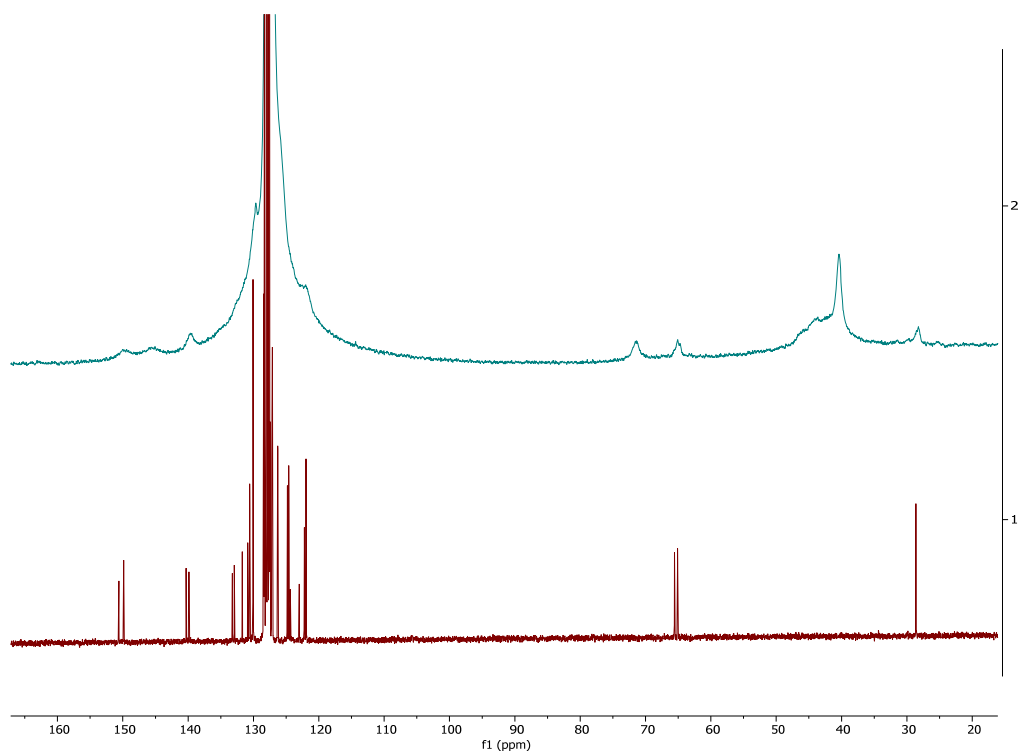

**Figure S103.**  $^{13}\text{C}$  NMR spectra comparison of PS-(*R*)-L<sub>5</sub> and (*R*)-L<sub>5</sub> in C<sub>6</sub>D<sub>6</sub>.

# Supporting Information

## SI-19. Copies of NMR spectra of ligands L<sub>10</sub> and L<sub>11</sub>

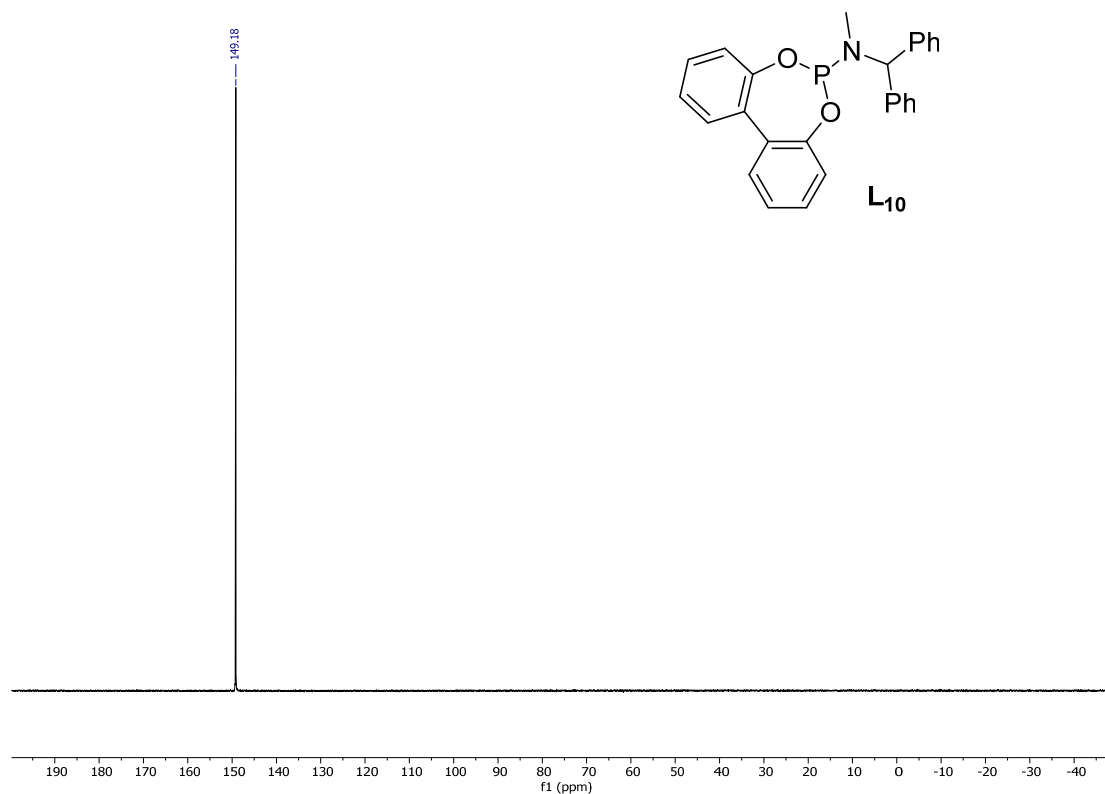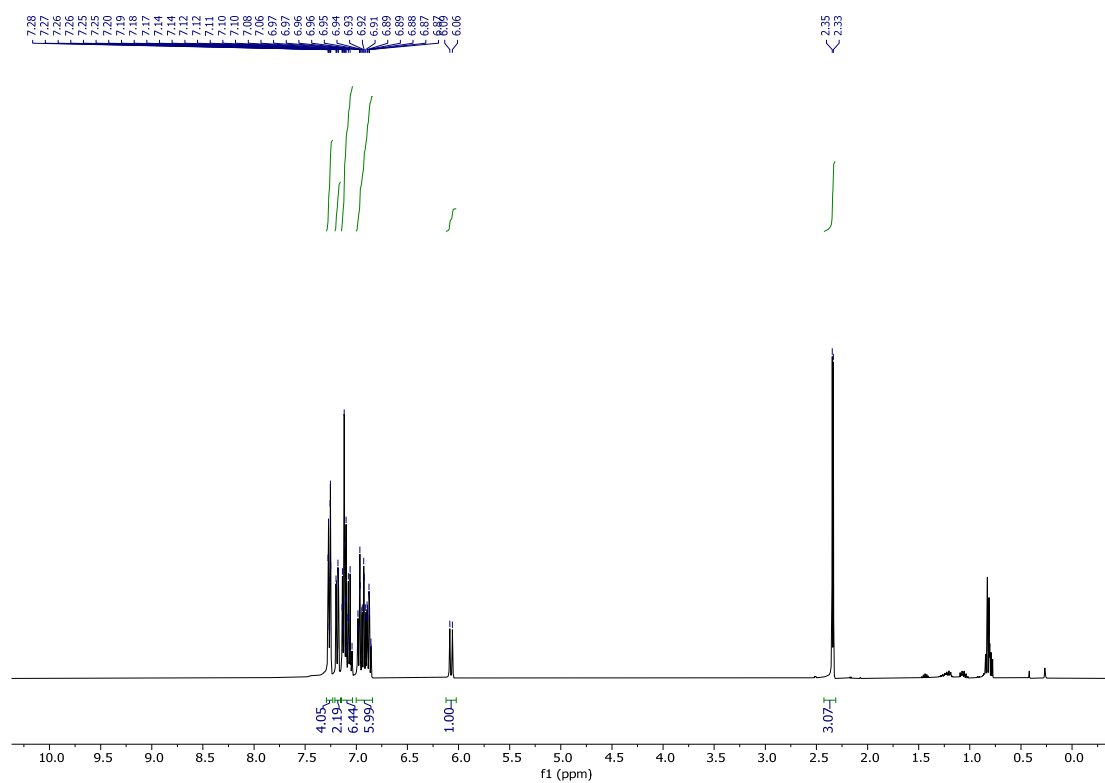

## Supporting Information

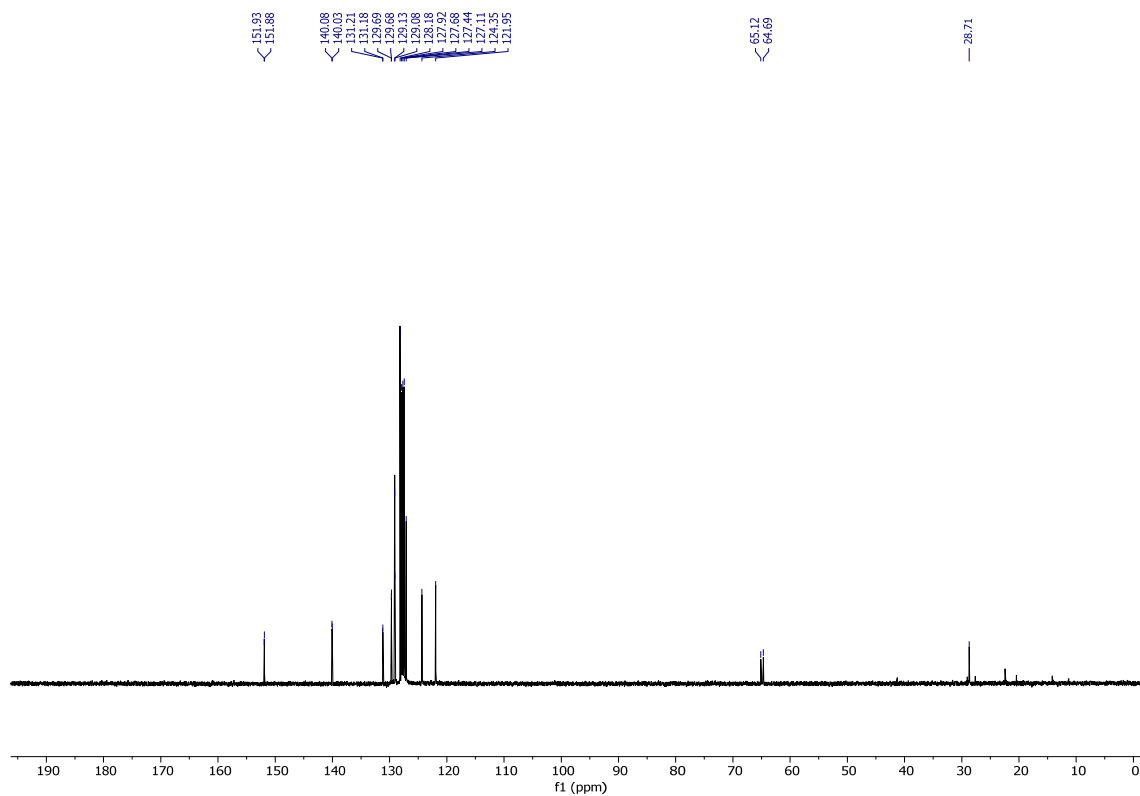

Figure S106.  $^{13}\text{C}$  NMR of  $\text{L}_{10}$  in  $\text{C}_6\text{D}_6$ .

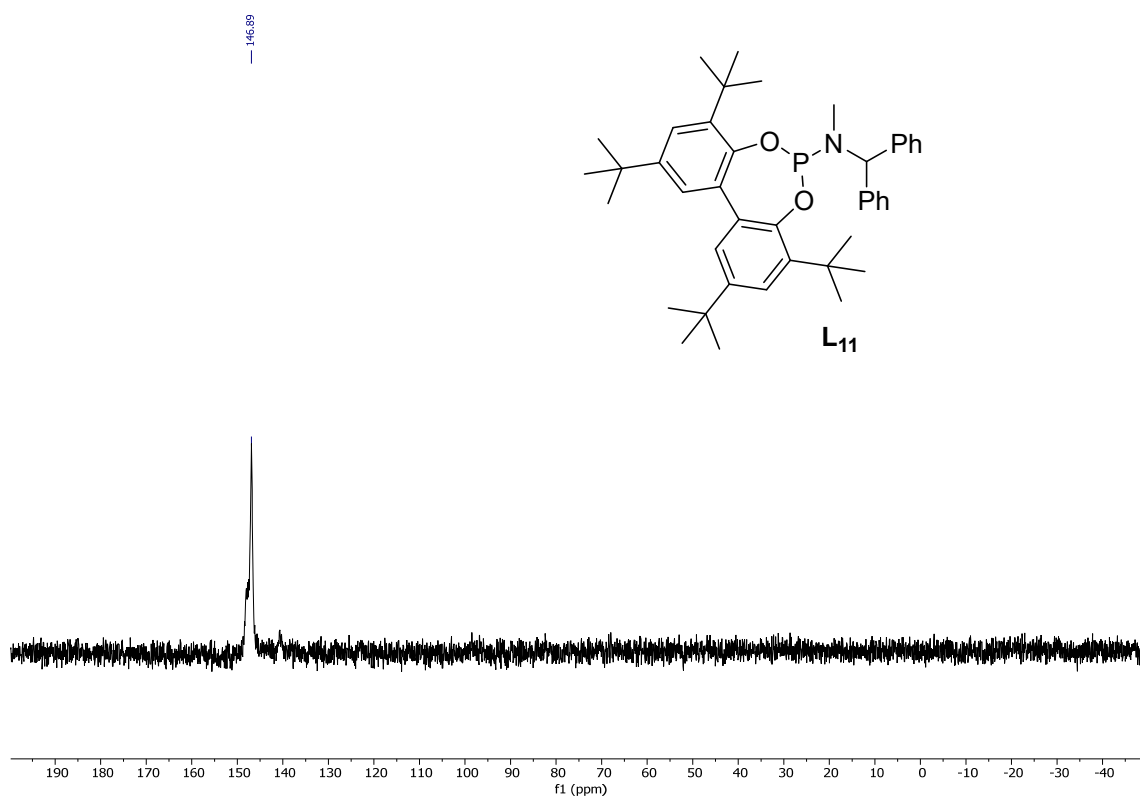

Figure S107.  $^{31}\text{P}$  NMR of  $\text{L}_{11}$  in  $\text{C}_6\text{D}_6$ .

## Supporting Information

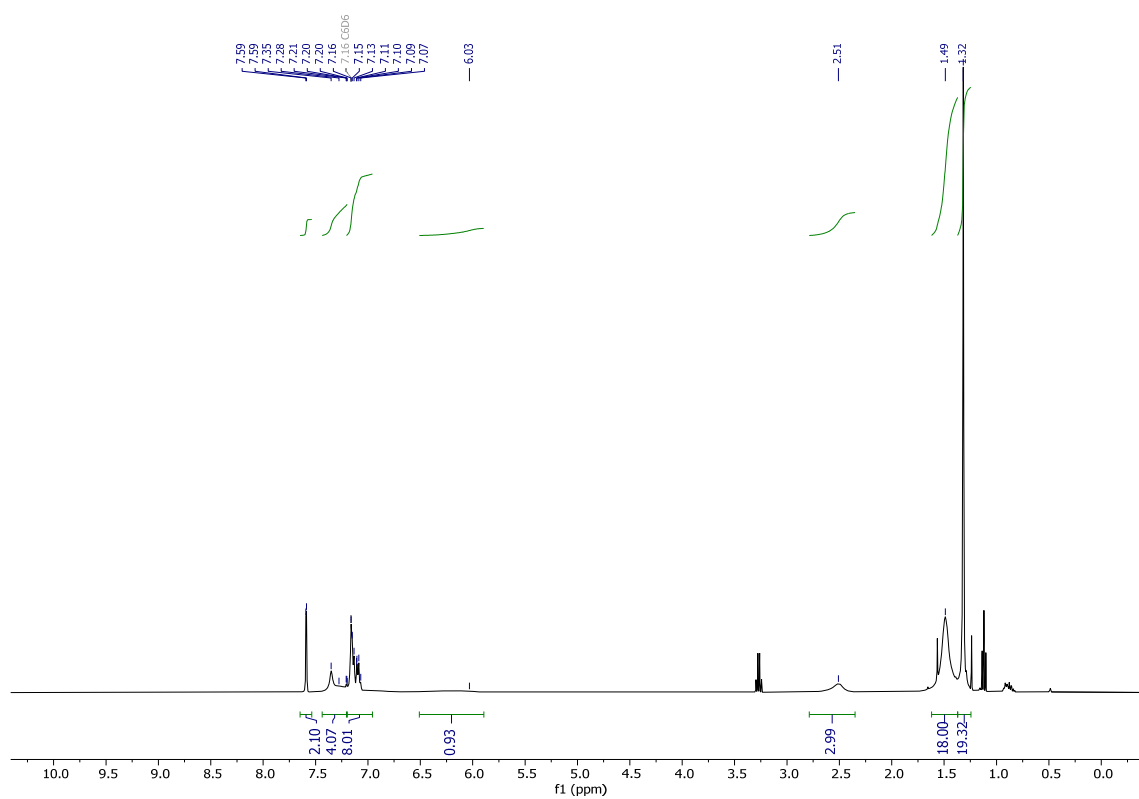

Figure S108. <sup>1</sup>H NMR L<sub>11</sub> in C<sub>6</sub>D<sub>6</sub>.

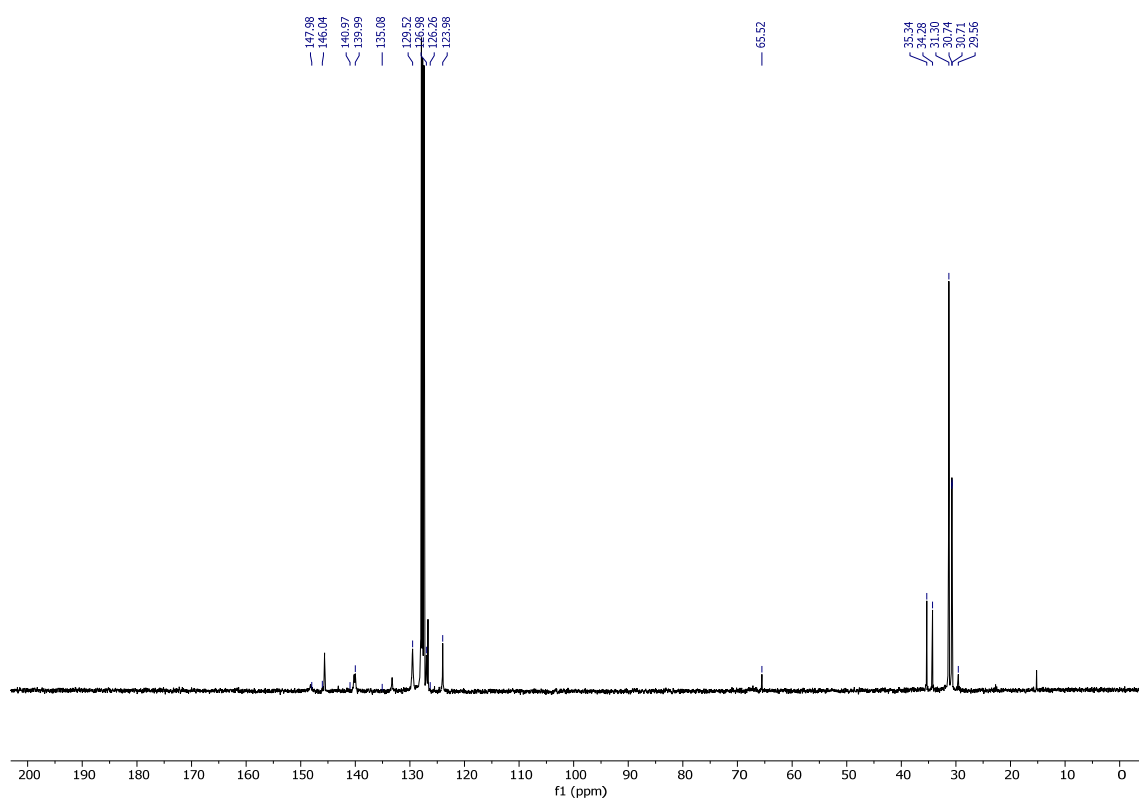

Figure S109. <sup>13</sup>C NMR L<sub>11</sub> in C<sub>6</sub>D<sub>6</sub>.

## Supporting Information

### SI-20. Sol-gel $^{31}\text{P}\{^1\text{H}\}$ NMR spectra of $\text{Pd}(\text{PS-}(R)\text{-L}_5)\text{L}_{11}$ species

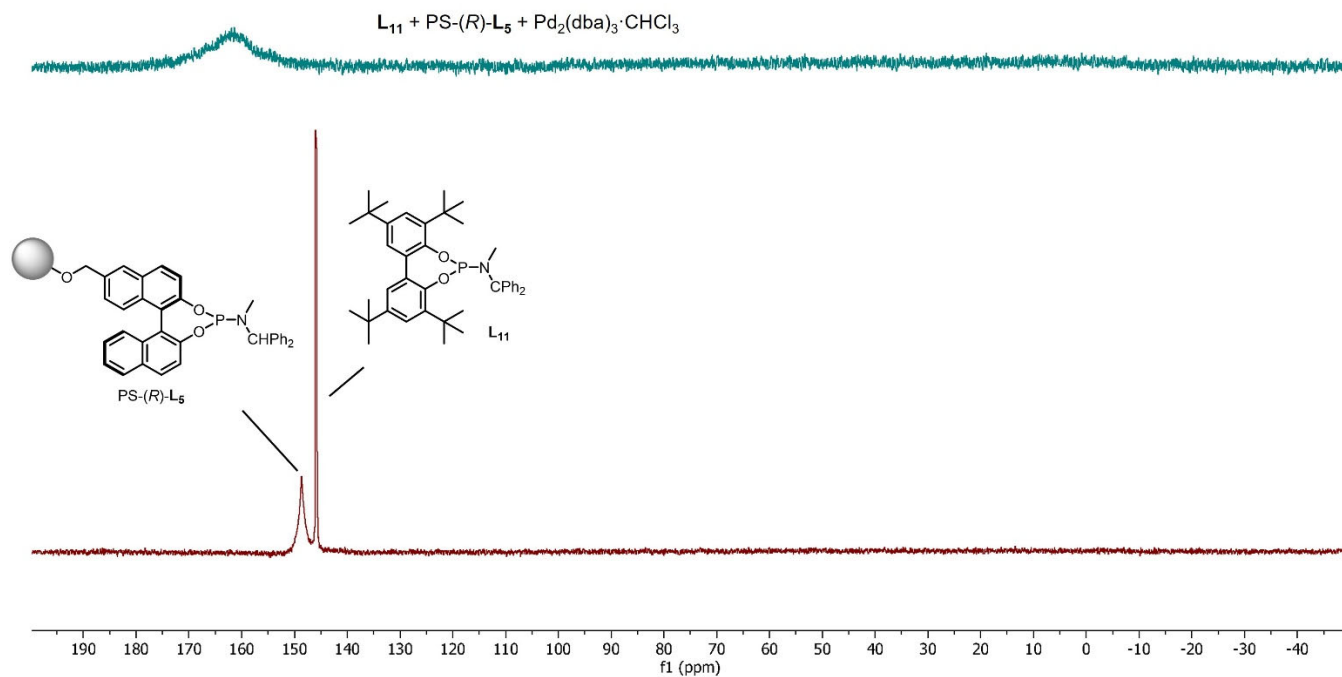

**Figure S110.** Sol-gel  $^{31}\text{P}\{^1\text{H}\}$  NMR spectra of an equimolar mixture of  $\text{PS-}(R)\text{-L}_5$  and  $\text{L}_{11}$  in red and after addition of  $\text{Pd}_2(\text{dba})_3 \cdot \text{CHCl}_3$  in green in  $\text{THF-d}_8$ .

## Supporting Information

### SI-21. Copies of NMR spectra of post-functionalized products

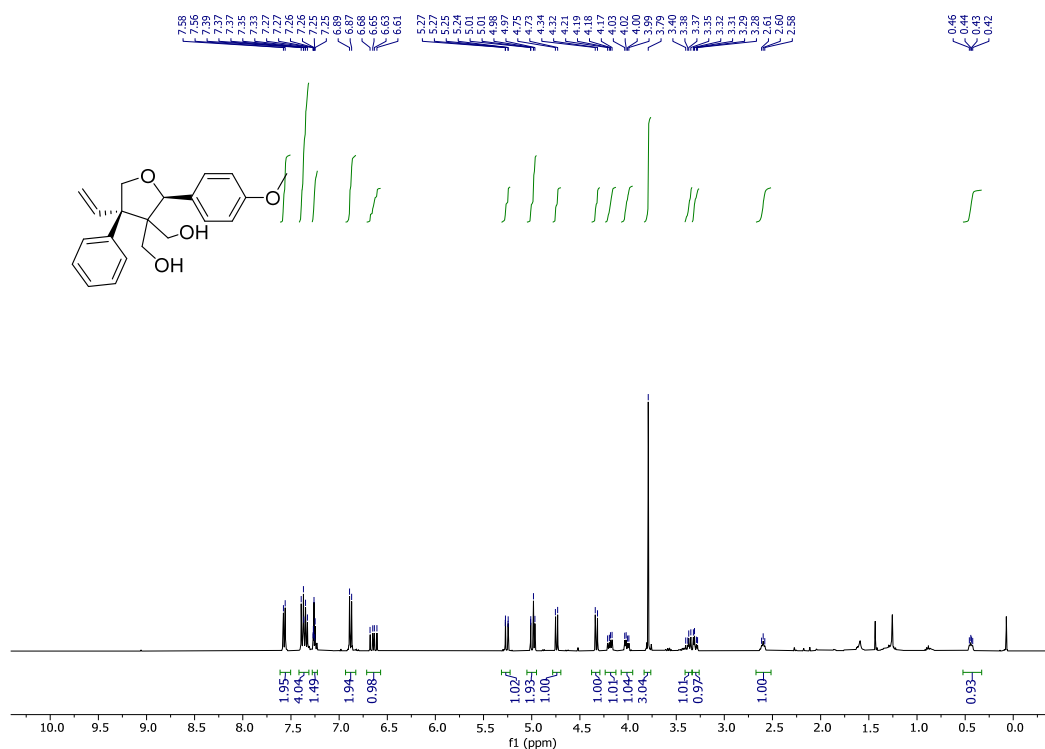

**Figure S111.**  $^1\text{H}$  NMR of ((2*S*,4*R*)-2-(4-methoxyphenyl)-4-phenyl-4-vinyltetrahydrofuran-3,3-diyl)dimethanol (**6**) in  $\text{CDCl}_3$ .

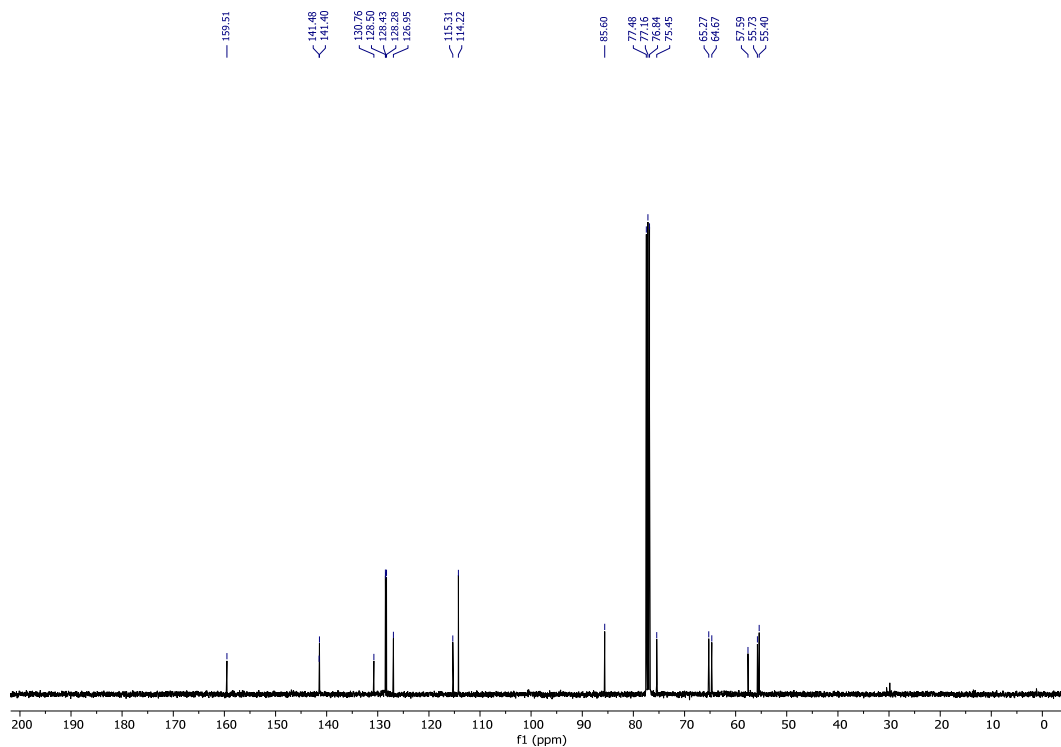

**Figure S112.**  $^{13}\text{C}$  NMR of ((2*S*,4*R*)-2-(4-methoxyphenyl)-4-phenyl-4-vinyltetrahydrofuran-3,3-diyl)dimethanol (**6**) in  $\text{CDCl}_3$ .

## Supporting Information

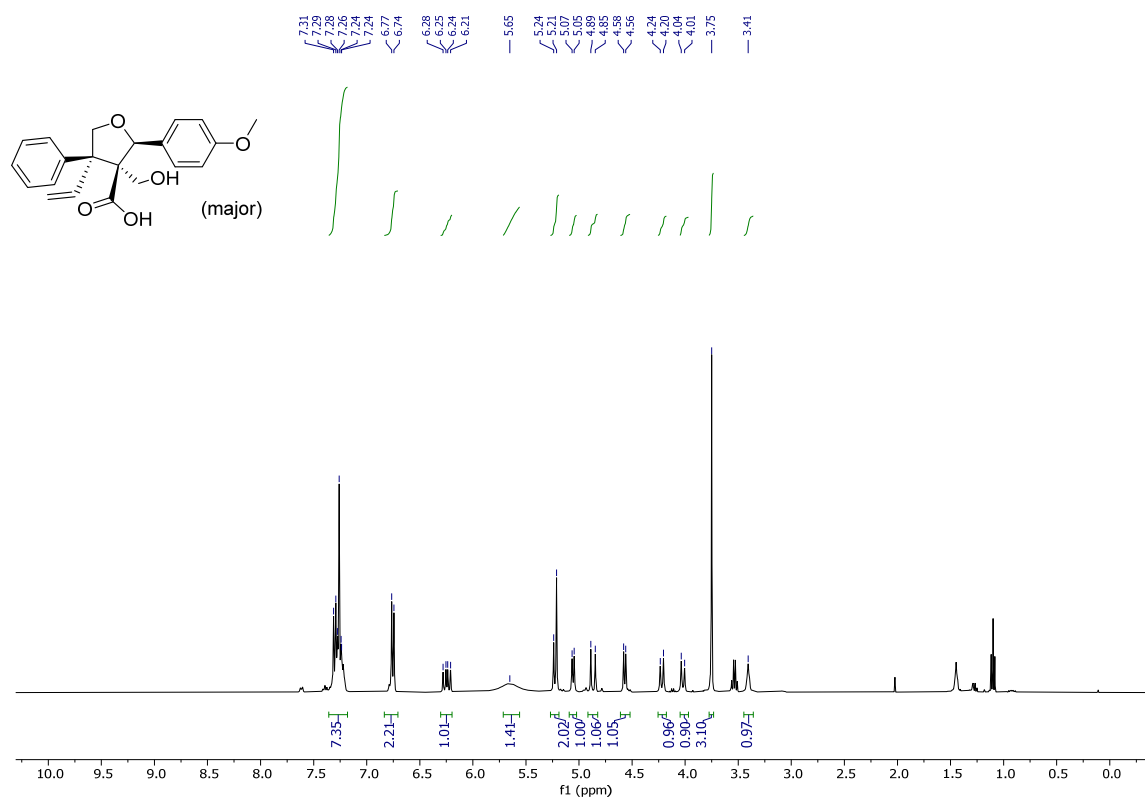

**Figure S113.** <sup>1</sup>H NMR of (2*S*,3*R*,4*R*)-3-(hydroxymethyl)-2-(4-methoxyphenyl)-4-phenyl-4-vinyltetrahydrofuran-3-carboxylic- acid (**7<sup>major</sup>**) in CDCl<sub>3</sub>.

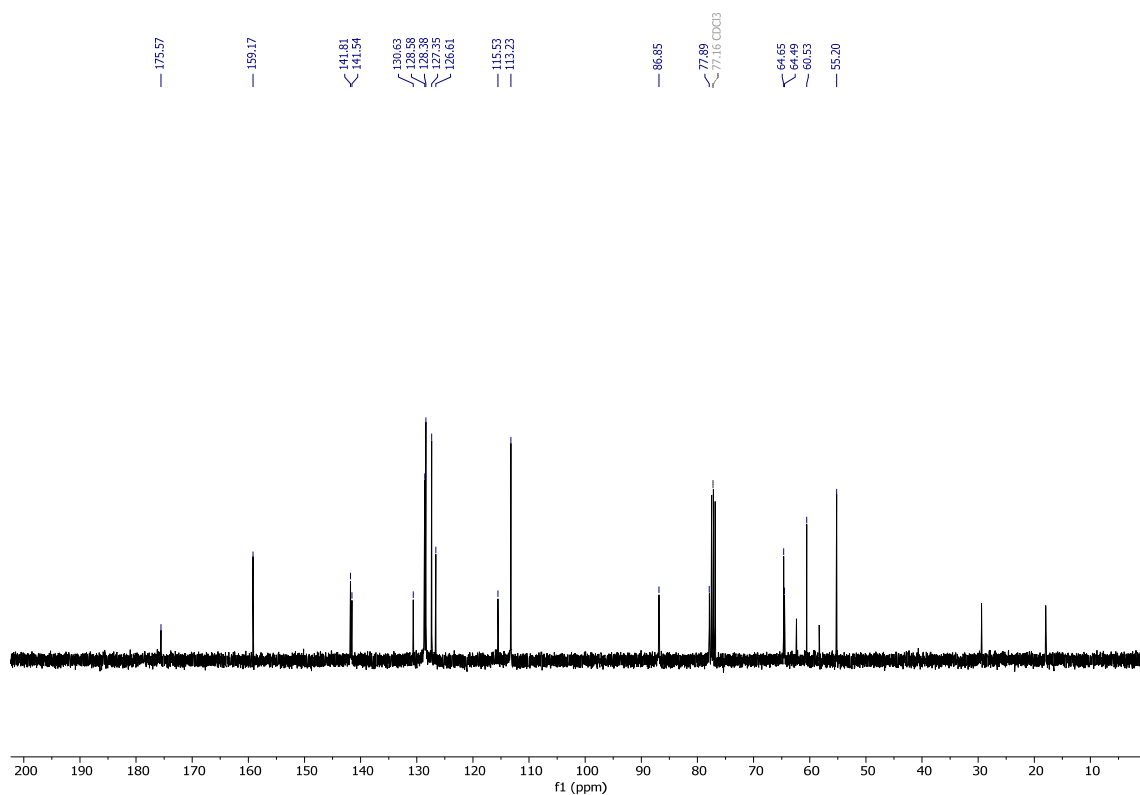

**Figure S114.** <sup>13</sup>C NMR of (2*S*,3*R*,4*R*)-3-(hydroxymethyl)-2-(4-methoxyphenyl)-4-phenyl-4-vinyltetrahydrofuran-3-carboxylic- acid (**7<sup>major</sup>**) in CDCl<sub>3</sub>.

## Supporting Information

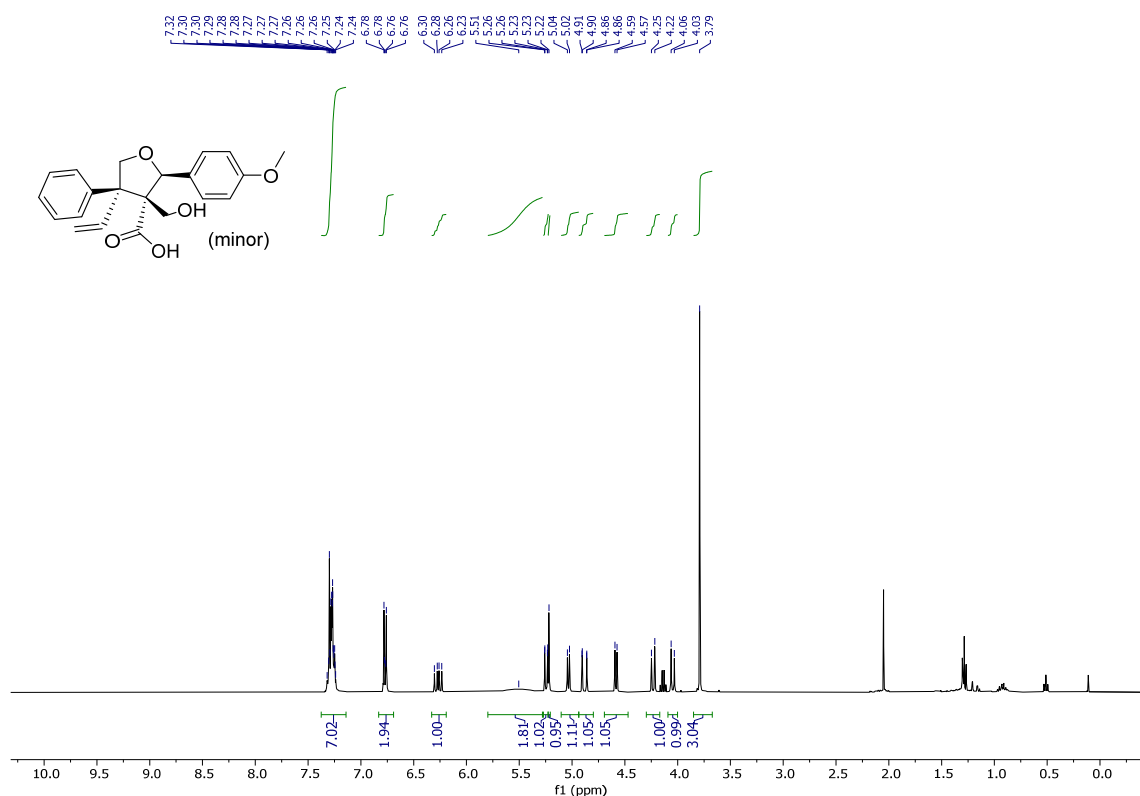

**Figure S115.** <sup>1</sup>H NMR of (2*S*,3*S*,4*R*)-3-(hydroxymethyl)-2-(4-methoxyphenyl)-4-phenyl-4-vinyltetrahydrofuran-3-carboxylic acid (**7<sup>minor</sup>**) in CDCl<sub>3</sub>.

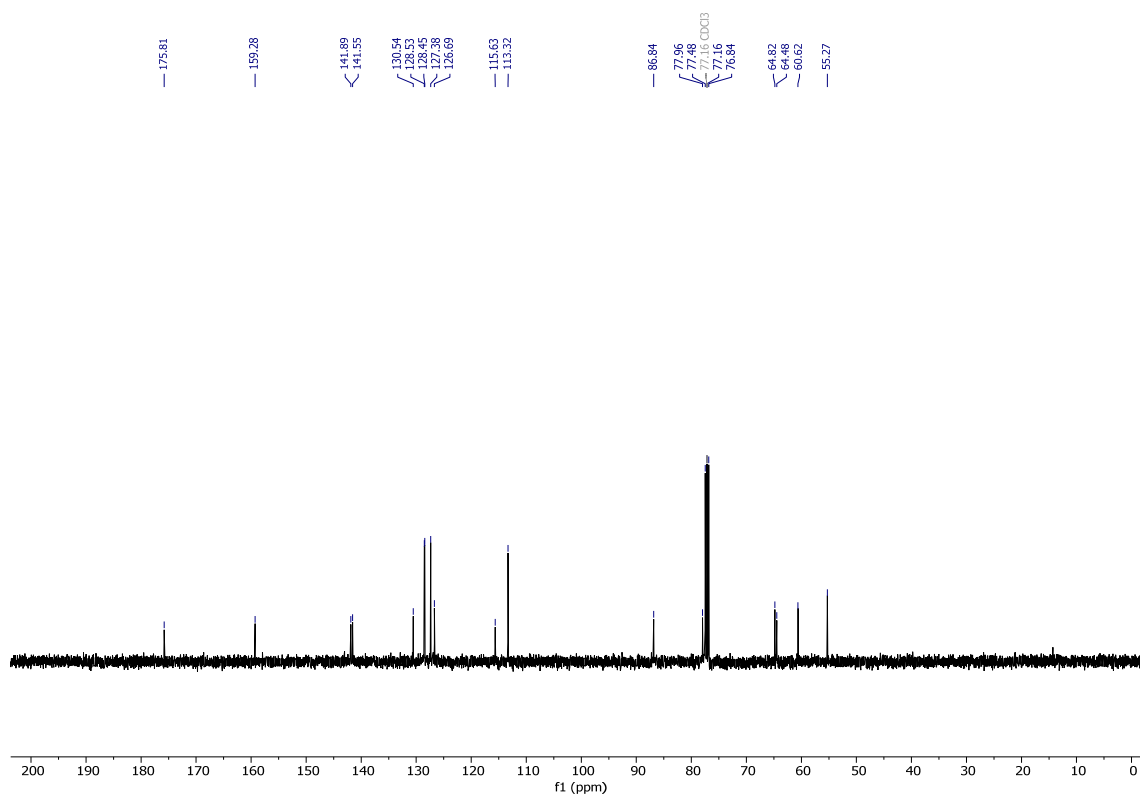

**Figure S116.** <sup>13</sup>C NMR of (2*S*,3*S*,4*R*)-3-(hydroxymethyl)-2-(4-methoxyphenyl)-4-phenyl-4-vinyltetrahydrofuran-3-carboxylic acid (**7<sup>minor</sup>**) in CDCl<sub>3</sub>.

## Supporting Information

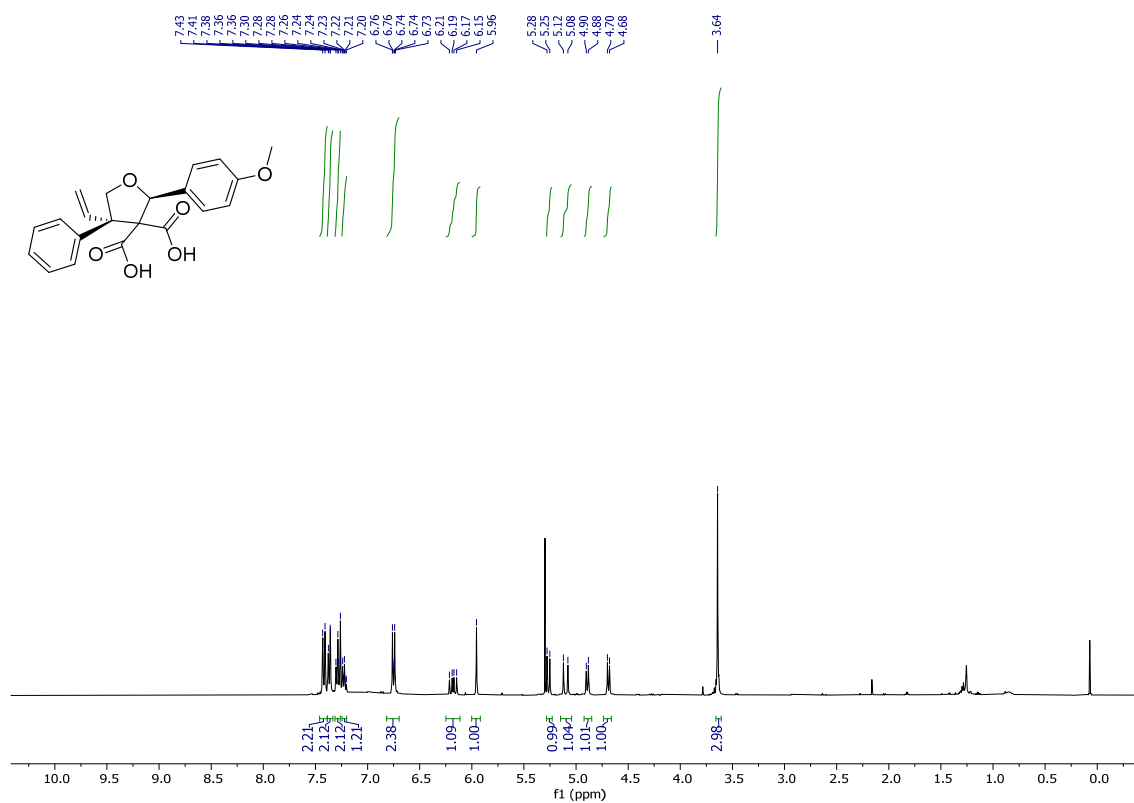

**Figure S117.** <sup>1</sup>H NMR of (2*S*,4*R*)-2-(4-methoxyphenyl)-4-phenyl-4-vinyldihydrofuran-3,3(2*H*)-dicarboxylic acid (**8**) in CDCl<sub>3</sub>.

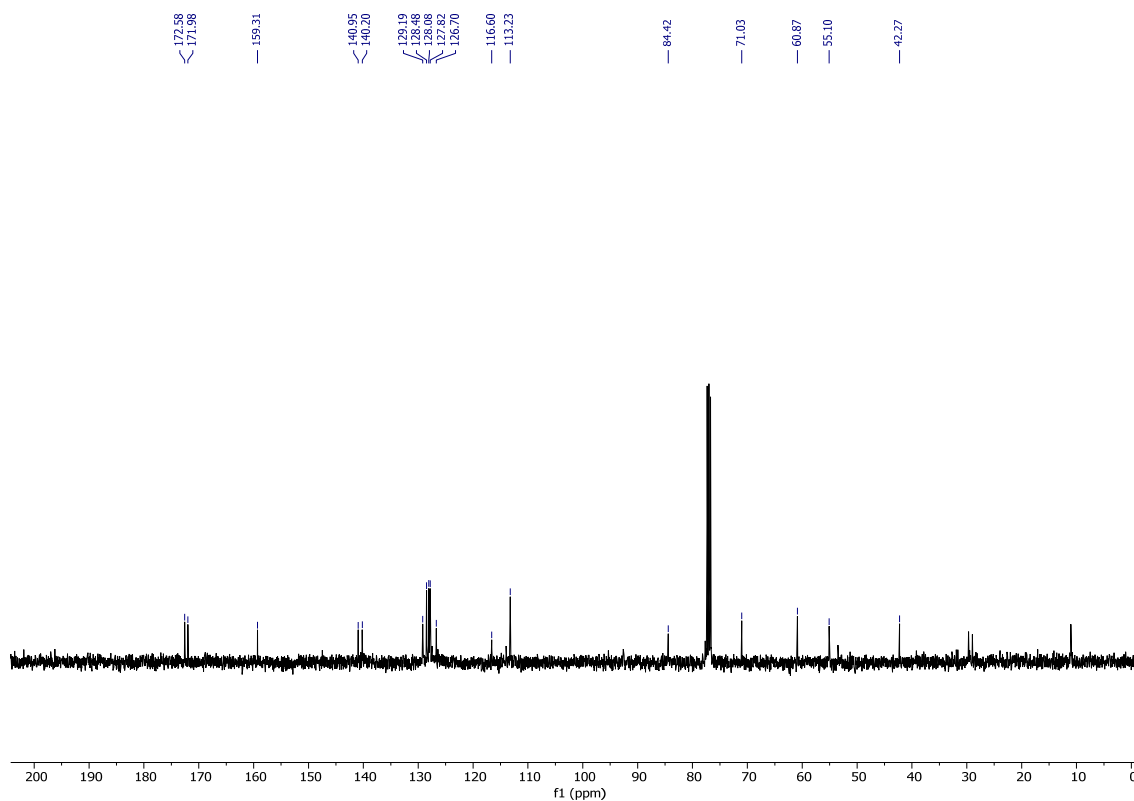

**Figure S118.** <sup>13</sup>C NMR of (2*S*,4*R*)-2-(4-methoxyphenyl)-4-phenyl-4-vinyldihydrofuran-3,3(2*H*)-dicarboxylic acid (**8**) in CDCl<sub>3</sub>.

## Supporting Information

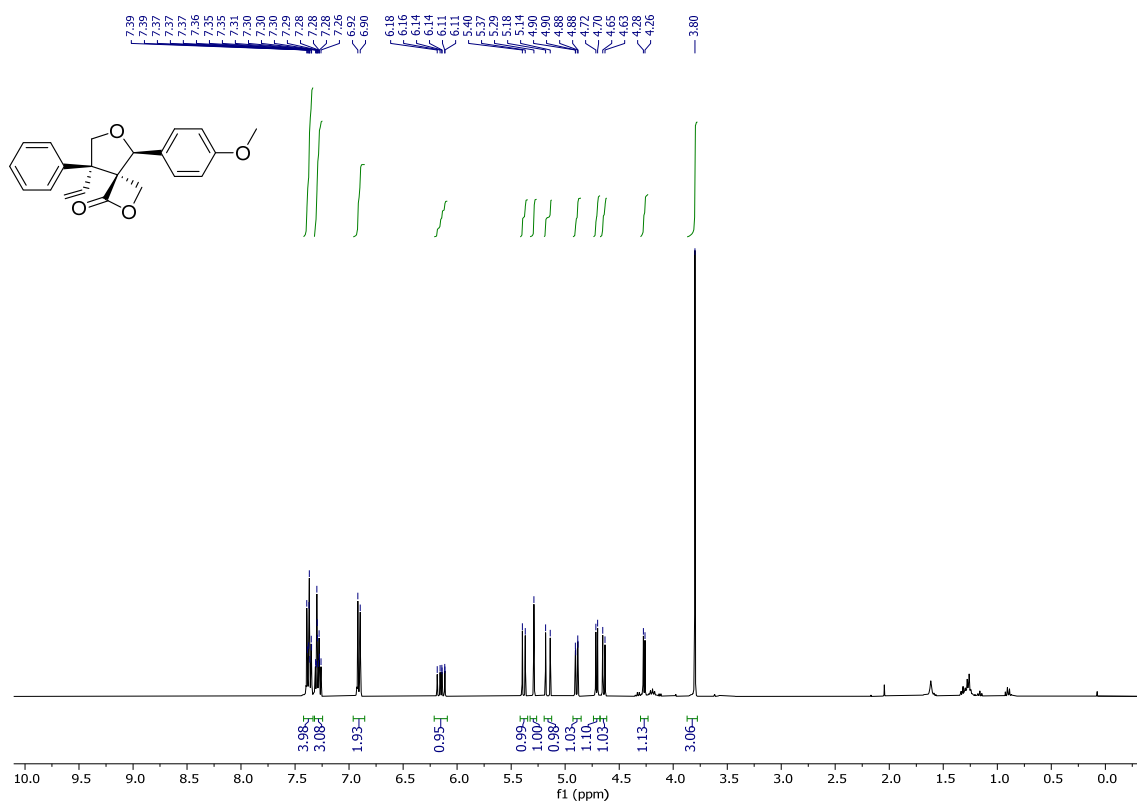

**Figure S119.** <sup>13</sup>C NMR of (4R,5S,8R)-5-(4-methoxyphenyl)-8-phenyl-8-vinyl-2,6-dioxaspiro[3.4]octan-1-one (**9**) in CDCl<sub>3</sub>.

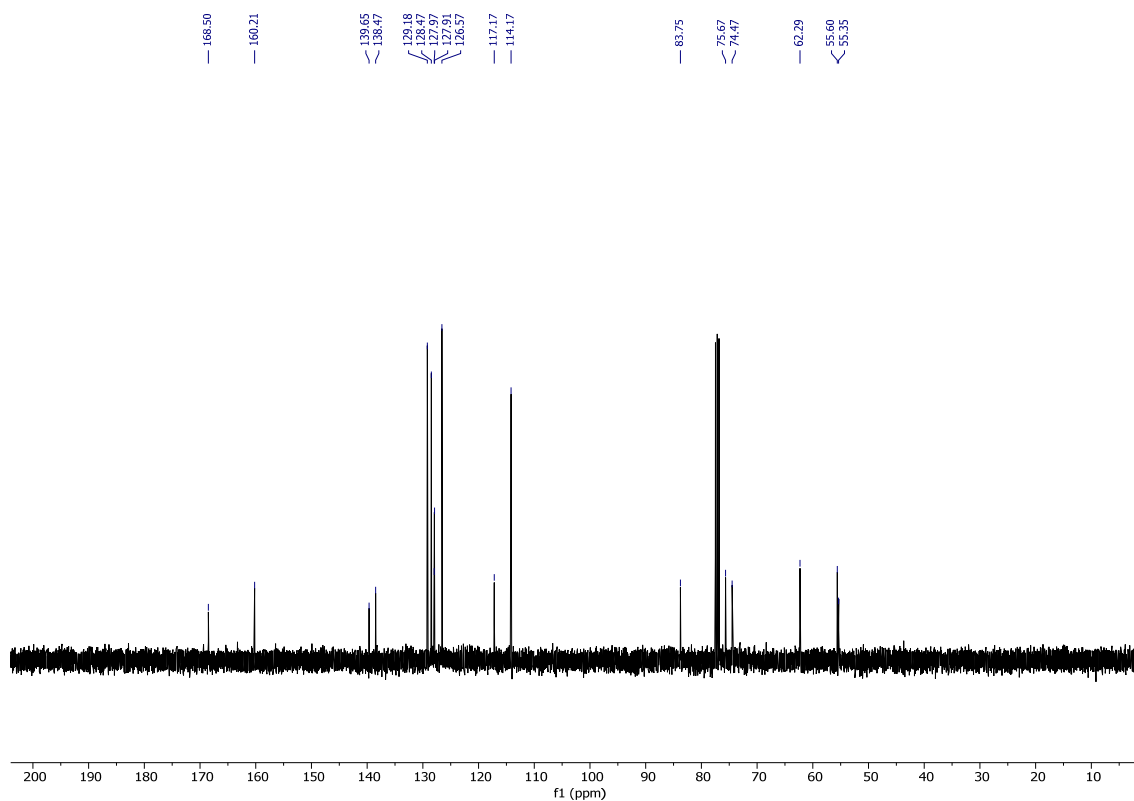

**Figure S120.** <sup>13</sup>C NMR of (4R,5S,8R)-5-(4-methoxyphenyl)-8-phenyl-8-vinyl-2,6-dioxaspiro[3.4]octan-1-one (**9**) in CDCl<sub>3</sub>.

## Supporting Information

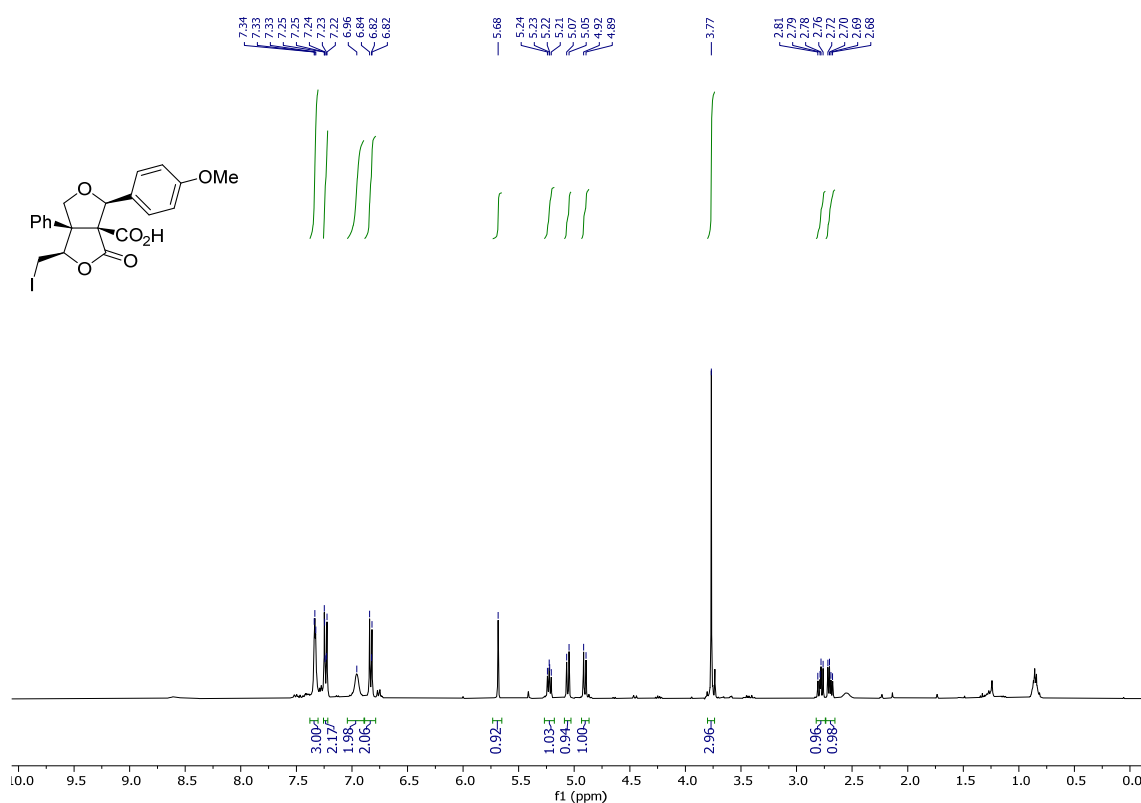

**Figure S121.** <sup>1</sup>H NMR of (1*R*,3*aR*,4*S*,6*aS*)-1-(iodomethyl)-4-(4-methoxyphenyl)-3-oxo-6*a*-phenyldihydro-1*H*,3*H*-furo[3,4-*c*]furan-3*a*(4*H*)-carboxylic acid (**10**) in CDCl<sub>3</sub>.

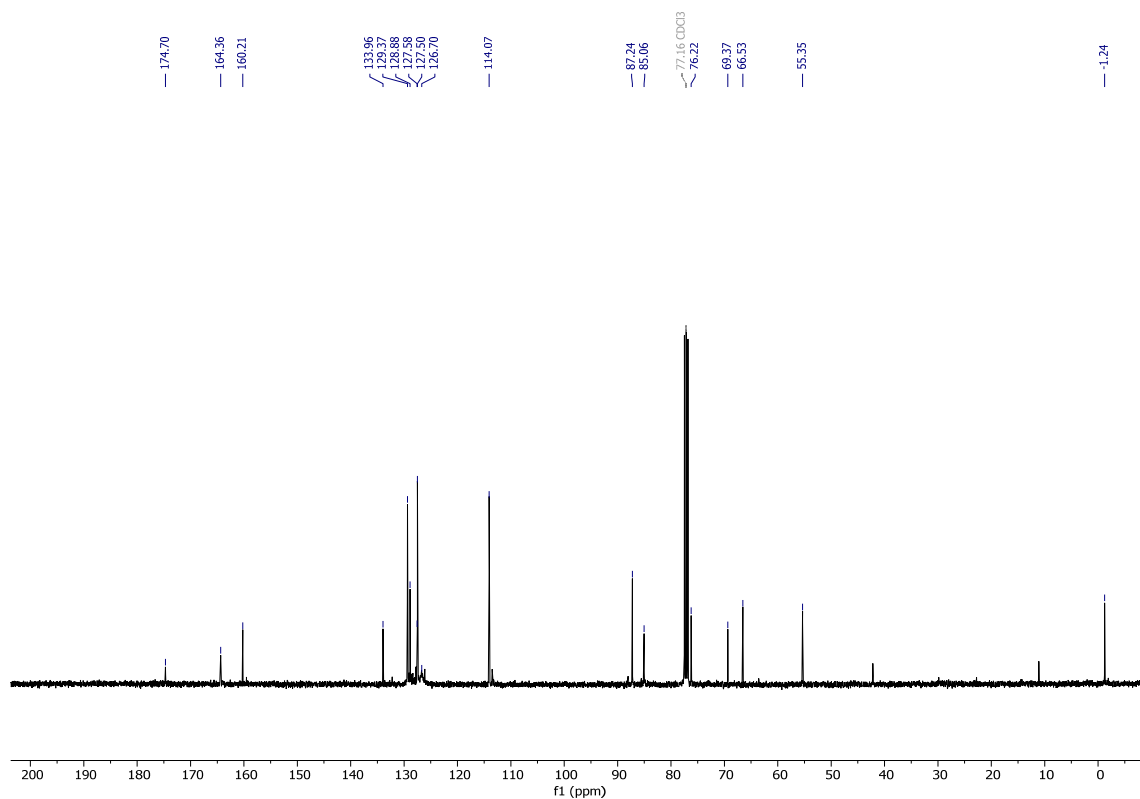

**Figure S122.** <sup>13</sup>C NMR of (1*R*,3*aR*,4*S*,6*aS*)-1-(iodomethyl)-4-(4-methoxyphenyl)-3-oxo-6*a*-phenyldihydro-1*H*,3*H*-furo[3,4-*c*]furan-3*a*(4*H*)-carboxylic acid (**10**) in CDCl<sub>3</sub>.

## Supporting Information

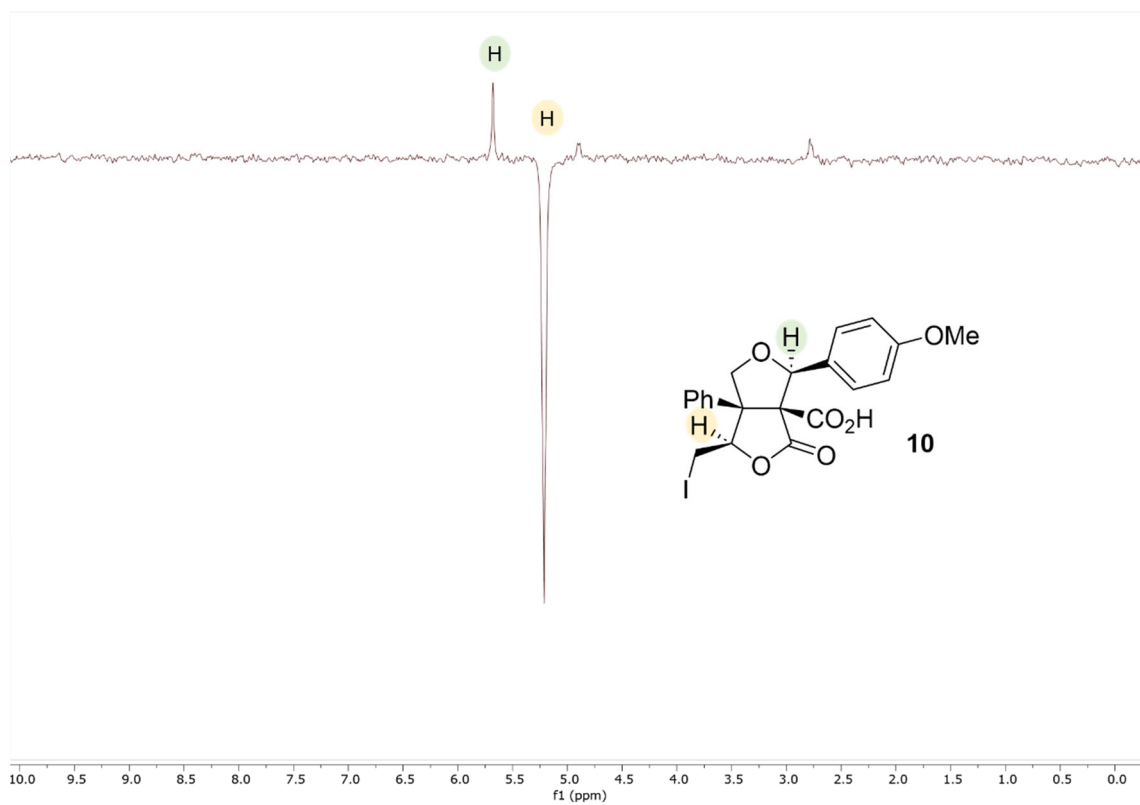

**Figure S123.** 1D-NOE spectra of **10** irradiating at 5.23 ppm (in yellow).

## Supporting Information

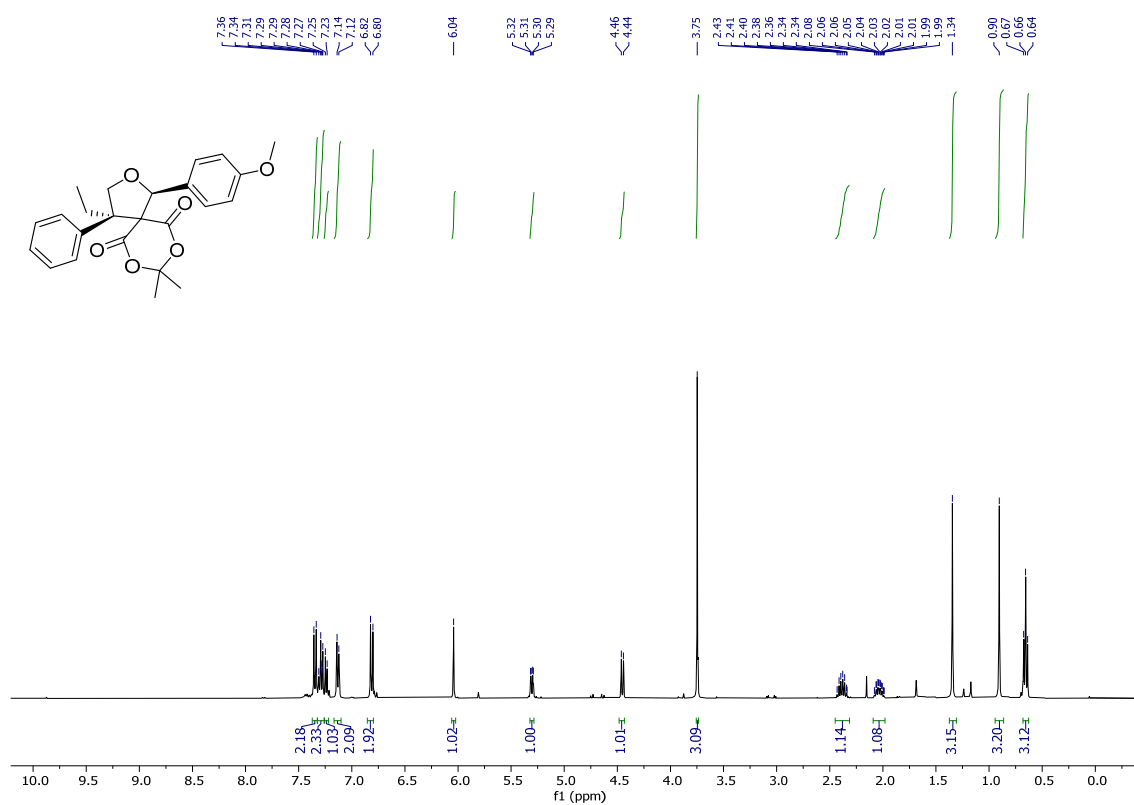

**Figure S124.** <sup>1</sup>H NMR of (1*S*,4*R*)-4-ethyl-1-(4-methoxyphenyl)-8,8-dimethyl-4-phenyl-2,7,9-trioxaspiro[4.5]decane-6,10-dione (**12**) in CDCl<sub>3</sub>.

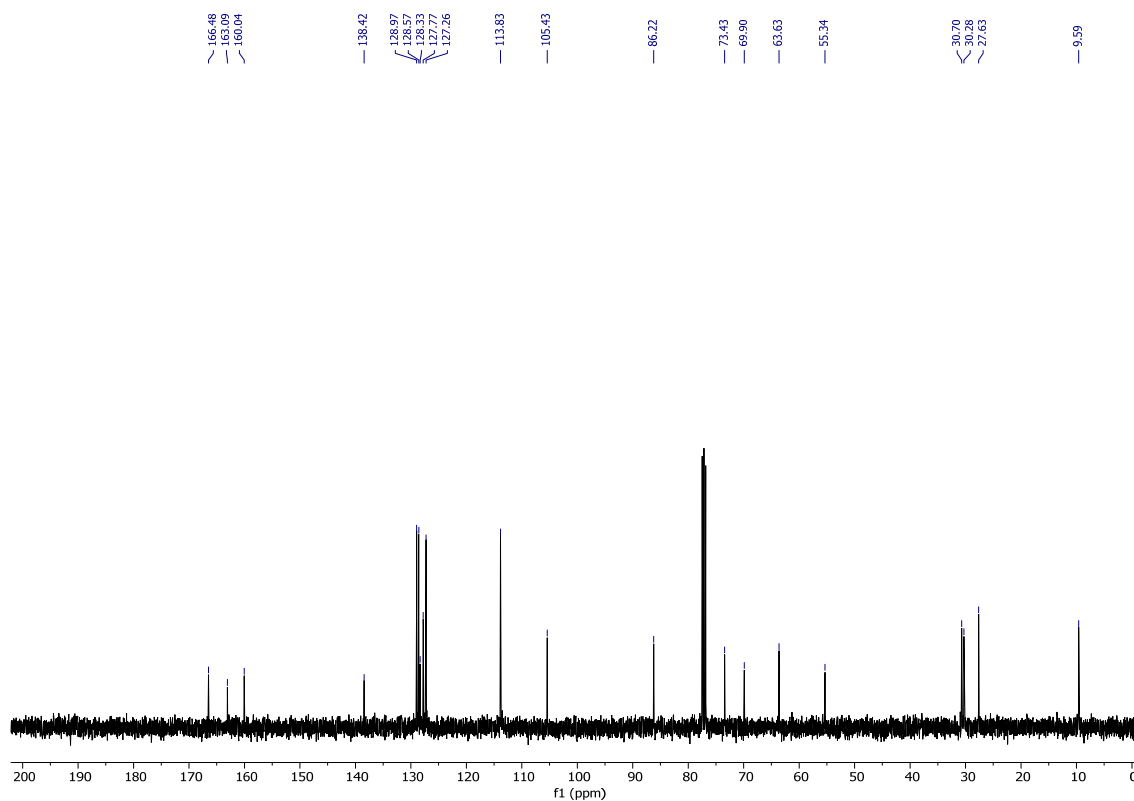

**Figure S125.** <sup>13</sup>C NMR of (1*S*,4*R*)-4-ethyl-1-(4-methoxyphenyl)-8,8-dimethyl-4-phenyl-2,7,9-trioxaspiro[4.5]decane-6,10-dione (**12**) in CDCl<sub>3</sub>.

## Supporting Information

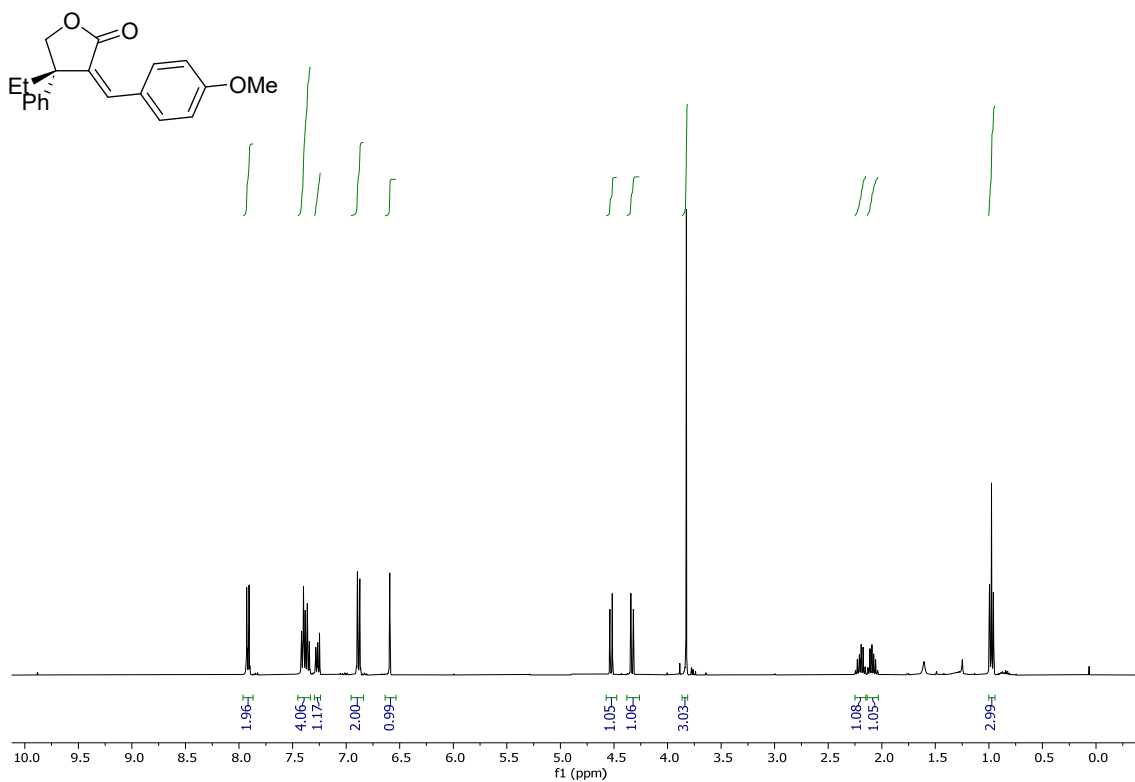

**Figure S126.**  $^1\text{H}$  NMR of (S,Z)-4-ethyl-3-(4-methoxybenzylidene)-4-phenyldihydrofuran-2(3H)-one (**11**) in  $\text{CDCl}_3$ .

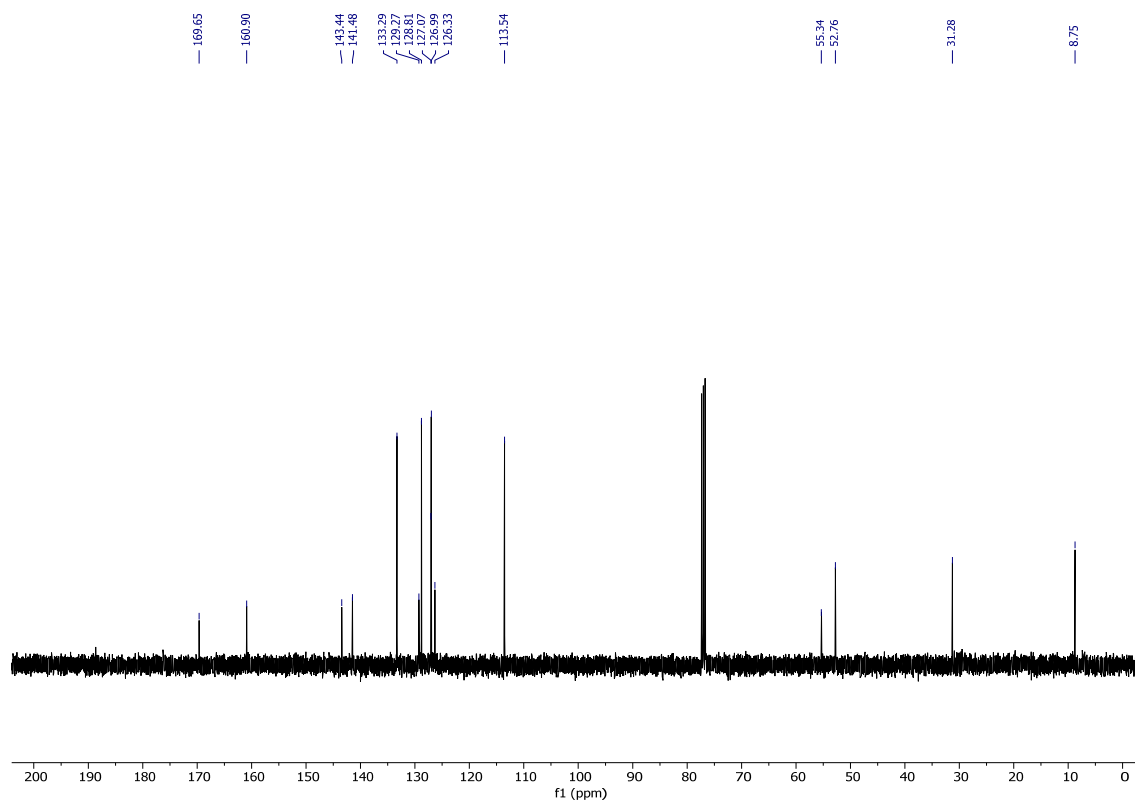

**Figure S127.**  $^{13}\text{C}$  NMR of (S,Z)-4-ethyl-3-(4-methoxybenzylidene)-4-phenyldihydrofuran-2(3H)-one (**11**) in  $\text{CDCl}_3$ .

## Supporting Information

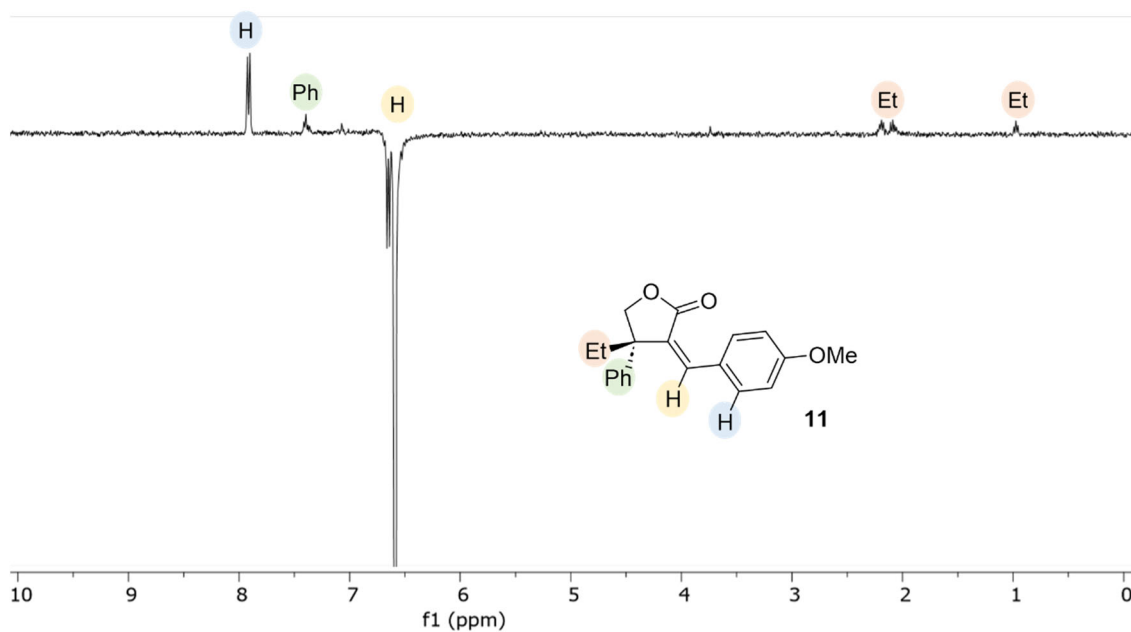

**Figure S128.** 1D-NOE spectra of **11** irradiating at 6.55 ppm (in yellow).

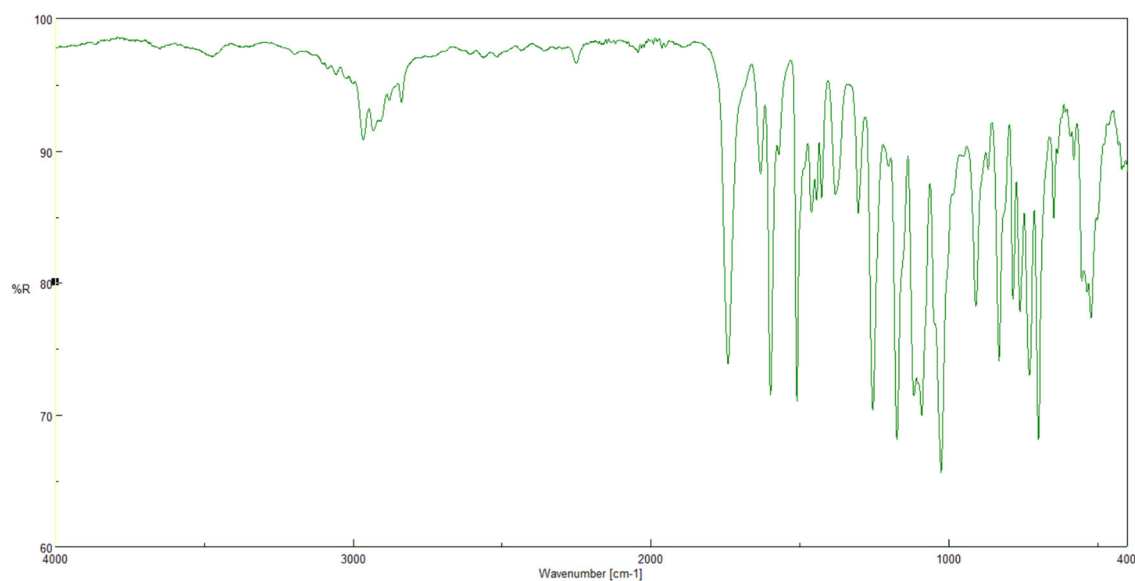

**Figure S129.** ATR-IR of (S,Z)-4-ethyl-3-(4-methoxybenzylidene)-4-phenyldihydrofuran-2(3H)-one (**11**).

## Supporting Information

(a)

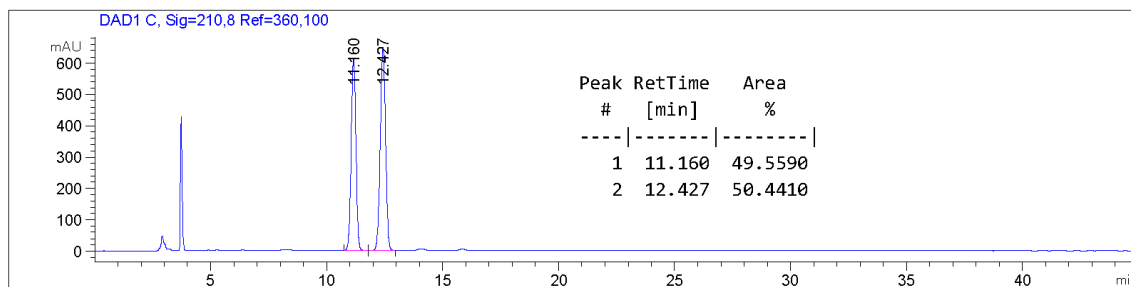

(b)

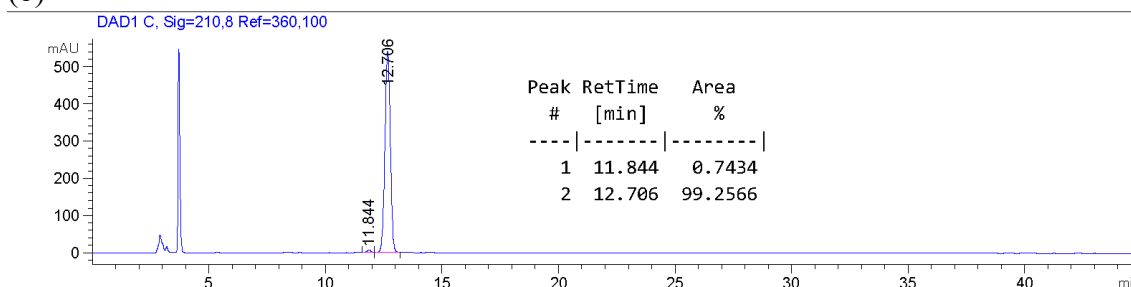

**Figure S130.** HPLC traces of (a) racemic and (b) enantioenriched product **11**.

## Supporting Information

### SI-22. Characterization details and copies of NMR spectra and HPLC traces of allylic alkylation product

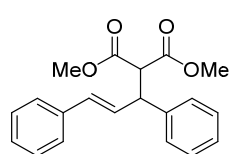

**Dimethyl 2-(1,3-diphenylallyl)malonate.**<sup>16</sup> <sup>1</sup>H NMR (CDCl<sub>3</sub>),  $\delta$ : 3.52 (s, 3H, CH<sub>3</sub>), 3.70 (s, 3H, CH<sub>3</sub>), 3.95 (d, 1H, CH,  $J=10.9$  Hz), 4.26 (m, 1H, CH), 6.34 (dd, 1H, CH=,  $J=16.0$  Hz,  $J=8.4$  Hz), 6.48 (d, 1H, CH=,  $J=16.0$  Hz), 7.1-7.4 (m, 10H, CH=). Enantiomeric excess determined by HPLC using Chiralcel OJ-H column (87% hexane/2-propanol, flow 0.5 mL/min).  $t_R$  29.1 min (*R*);  $t_R$  32.9min (*S*).

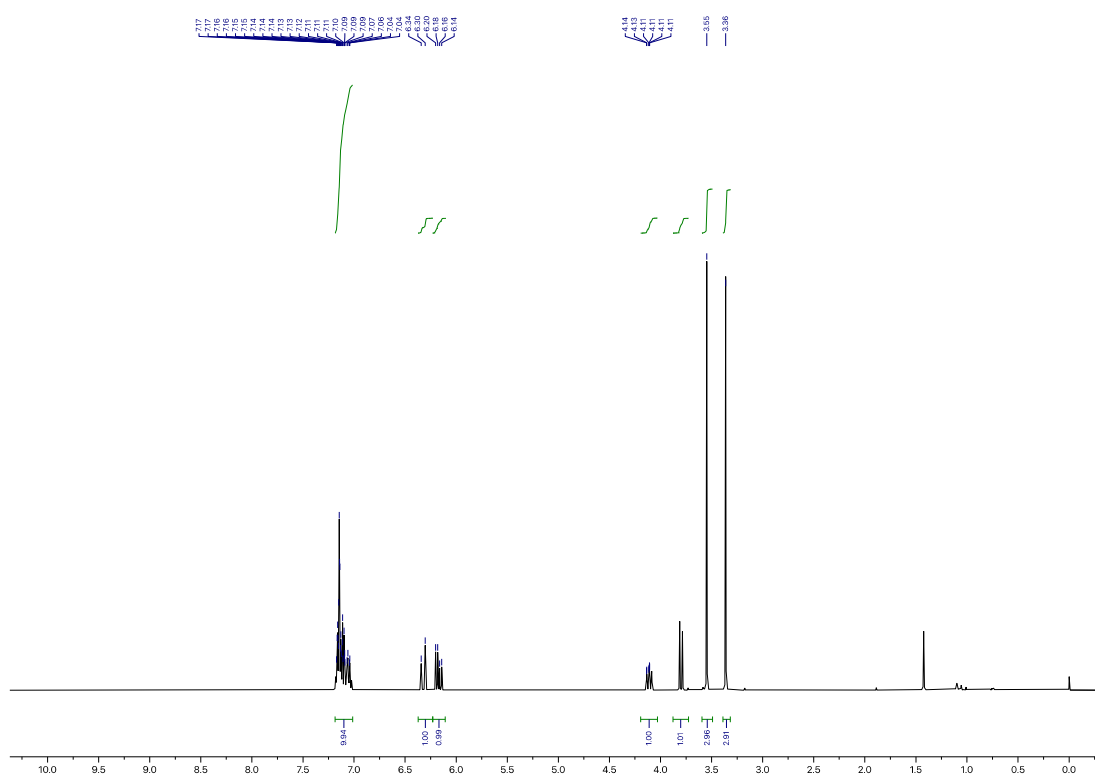

**Figure S131.** <sup>1</sup>H NMR of dimethyl 2-(1,3-diphenylallyl)malonate in CDCl<sub>3</sub>.

## Supporting Information

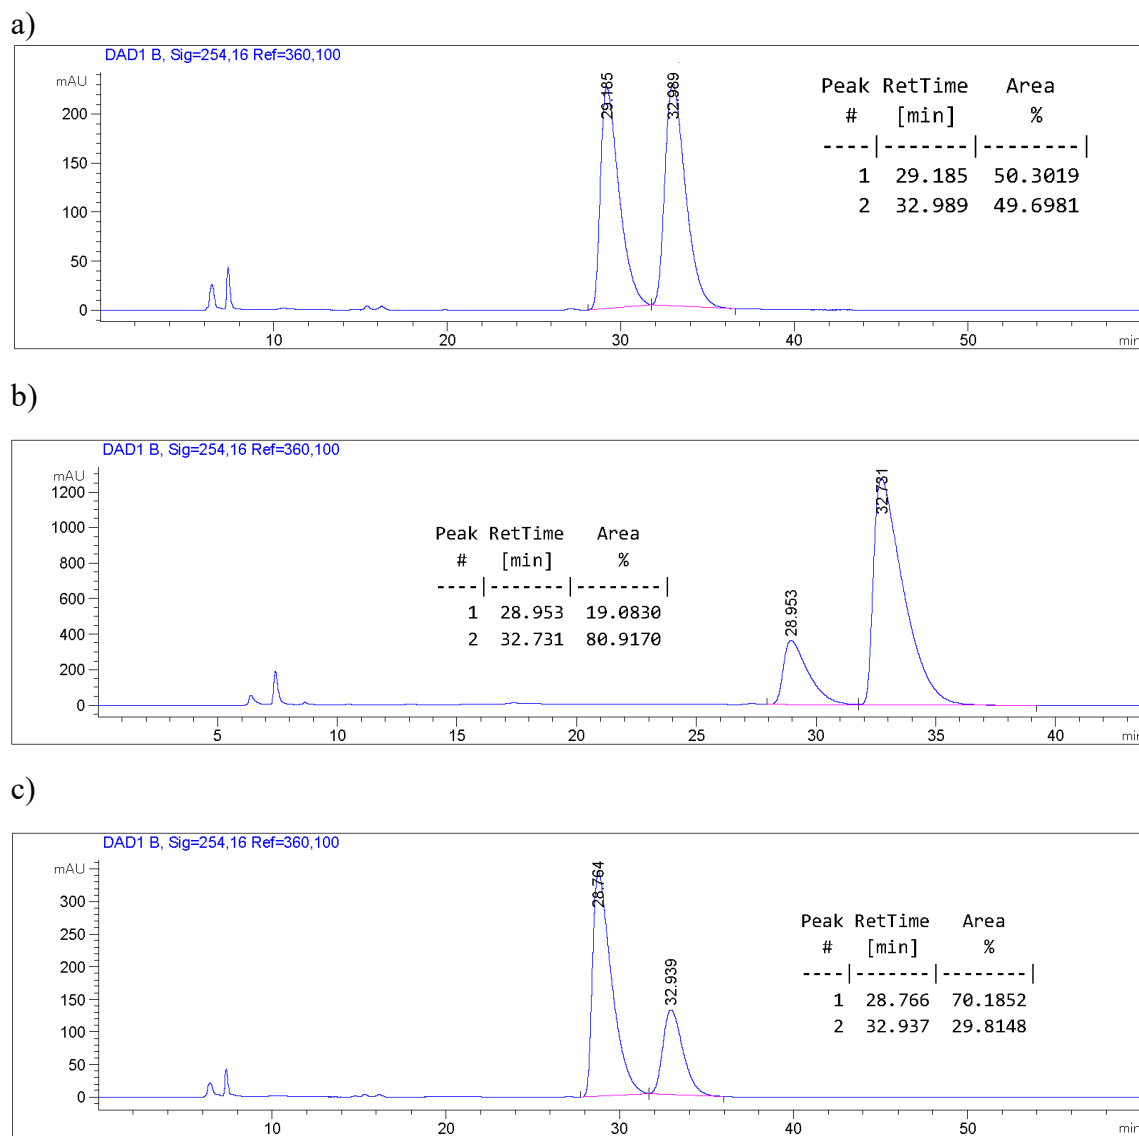

**Figure S132.** HPLC traces of (a) racemic, (b) enantioenriched product using Pd/PS-(*R*)-L<sub>5</sub>/L<sub>11</sub> catalytic system, and (c) enantioenriched product using (*S*)-L<sub>5</sub>/L<sub>11</sub> catalytic system.

## Supporting Information

### SI-23. Kinetic data and reaction order of the catalyst

- *Epoxide kinetic order data*

[2a]= 0.2292 M

| t (min) | integral IS | integral 3'ba | integral 3ba | 3'ba+3ba | mmol product |
|---------|-------------|---------------|--------------|----------|--------------|
| -       | 113,4 ppm   | 62,5 ppm      | 62,6 ppm     | -        | -            |
| 1,500   | 100,000     | 2,350         | 3,530        | 5,880    | 0,002        |
| 3,000   | 100,000     | 4,590         | 7,120        | 11,710   | 0,004        |
| 4,500   | 100,000     | 7,010         | 10,130       | 17,140   | 0,006        |
| 6,000   | 100,000     | 9,420         | 13,860       | 23,280   | 0,008        |
| 7,500   | 100,000     | 11,570        | 17,060       | 28,630   | 0,010        |
| 9,000   | 100,000     | 13,390        | 19,750       | 33,140   | 0,012        |
| 10,500  | 100,000     | 15,820        | 23,230       | 39,050   | 0,014        |
| 12,000  | 100,000     | 18,480        | 27,270       | 45,750   | 0,016        |
| 13,500  | 100,000     | 20,380        | 29,970       | 50,350   | 0,018        |
| 15,000  | 100,000     | 22,480        | 33,180       | 55,660   | 0,020        |
| 16,500  | 100,000     | 25,640        | 37,150       | 62,790   | 0,022        |
| 18,000  | 100,000     | 27,810        | 40,830       | 68,640   | 0,024        |
| 19,500  | 100,000     | 29,190        | 43,580       | 72,770   | 0,026        |
| 21,000  | 100,000     | 31,320        | 46,900       | 78,220   | 0,028        |
| 22,500  | 100,000     | 34,840        | 51,280       | 86,120   | 0,031        |
| 24,000  | 100,000     | 36,480        | 53,950       | 90,430   | 0,032        |
| 25,500  | 100,000     | 38,030        | 56,740       | 94,770   | 0,034        |
| 27,000  | 100,000     | 40,170        | 60,730       | 100,900  | 0,036        |
| 28,500  | 100,000     | 43,710        | 65,000       | 108,710  | 0,039        |
| 30,000  | 100,000     | 44,560        | 67,410       | 111,970  | 0,040        |
| 31,500  | 100,000     | 46,080        | 69,810       | 115,890  | 0,041        |
| 33,000  | 100,000     | 46,780        | 70,290       | 117,070  | 0,042        |
| 34,500  | 100,000     | 47,170        | 71,070       | 118,240  | 0,042        |

[2a]= 0.09824 M

| t (min) | integral IS | integral 3'ba | integral 3ba | 3'ba+3ba | mmol product |
|---------|-------------|---------------|--------------|----------|--------------|
| -       | 113,4 ppm   | 62,5 ppm      | 62,6 ppm     | -        | -            |
| 1,5     | 100,00      | 1,29          | 1,81         | 3,1      | 0,00110112   |
| 3       | 100,00      | 2,13          | 3,47         | 5,6      | 0,00198912   |
| 4,5     | 100,00      | 3,36          | 4,83         | 8,19     | 0,00290909   |
| 6       | 100,00      | 3,99          | 6,33         | 10,32    | 0,00366566   |
| 7,5     | 100,00      | 4,92          | 7,72         | 12,64    | 0,00448973   |
| 9       | 100,00      | 5,84          | 9,08         | 14,92    | 0,00529958   |
| 10,5    | 100,00      | 7,23          | 10,65        | 17,88    | 0,00635098   |
| 12      | 100,00      | 8,01          | 12,21        | 20,22    | 0,00718214   |

## Supporting Information

[2a]= 0.045842 M

| t (min) | integral IS | integral 3'ba | integral 3ba | 3'ba+3ba | mmol product |
|---------|-------------|---------------|--------------|----------|--------------|
| -       | 113,4 ppm   | 62,5 ppm      | 62,6 ppm     | -        | -            |
| 1,5     | 100,00      | 5,8           | 8,04         | 13,84    | 0,00491597   |
| 3       | 100,00      | 11,16         | 16,43        | 27,59    | 0,00979997   |
| 4,5     | 100,00      | 16,79         | 24,29        | 41,08    | 0,01459162   |
| 6       | 100,00      | 21,71         | 32,4         | 54,11    | 0,01921987   |
| 7,5     | 100,00      | 27,78         | 40,9         | 68,68    | 0,02439514   |
| 9       | 100,00      | 33,22         | 49,04        | 82,26    | 0,02921875   |
| 10,5    | 100,00      | 39,1          | 56,61        | 95,71    | 0,03399619   |
| 12      | 100,00      | 44,19         | 65,38        | 109,57   | 0,03891926   |
| 13,5    | 100,00      | 48,14         | 70,74        | 118,88   | 0,04222618   |

## Supporting Information

- *Meldrum's acid derivative kinetic order data*

[1b]= 0.10658 M

| t (min) | integral IS | integral 3'ba | integral 3ba | 3'ba+3ba | mmol product |
|---------|-------------|---------------|--------------|----------|--------------|
| -       | 113,4 ppm   | 62,5 ppm      | 62,6 ppm     | -        | -            |
| 1,500   | 100,000     | 2,350         | 3,530        | 5,880    | 0,002        |
| 3,000   | 100,000     | 4,590         | 7,120        | 11,710   | 0,004        |
| 4,500   | 100,000     | 7,010         | 10,130       | 17,140   | 0,006        |
| 6,000   | 100,000     | 9,420         | 13,860       | 23,280   | 0,008        |
| 7,500   | 100,000     | 11,570        | 17,060       | 28,630   | 0,010        |
| 9,000   | 100,000     | 13,390        | 19,750       | 33,140   | 0,012        |
| 10,500  | 100,000     | 15,820        | 23,230       | 39,050   | 0,014        |
| 12,000  | 100,000     | 18,480        | 27,270       | 45,750   | 0,016        |
| 13,500  | 100,000     | 20,380        | 29,970       | 50,350   | 0,018        |
| 15,000  | 100,000     | 22,480        | 33,180       | 55,660   | 0,020        |
| 16,500  | 100,000     | 25,640        | 37,150       | 62,790   | 0,022        |
| 18,000  | 100,000     | 27,810        | 40,830       | 68,640   | 0,024        |
| 19,500  | 100,000     | 29,190        | 43,580       | 72,770   | 0,026        |
| 21,000  | 100,000     | 31,320        | 46,900       | 78,220   | 0,028        |
| 22,500  | 100,000     | 34,840        | 51,280       | 86,120   | 0,031        |
| 24,000  | 100,000     | 36,480        | 53,950       | 90,430   | 0,032        |
| 25,500  | 100,000     | 38,030        | 56,740       | 94,770   | 0,034        |
| 27,000  | 100,000     | 40,170        | 60,730       | 100,900  | 0,036        |
| 28,500  | 100,000     | 43,710        | 65,000       | 108,710  | 0,039        |
| 30,000  | 100,000     | 44,560        | 67,410       | 111,970  | 0,040        |
| 31,500  | 100,000     | 46,080        | 69,810       | 115,890  | 0,041        |
| 33,000  | 100,000     | 46,780        | 70,290       | 117,070  | 0,042        |
| 34,500  | 100,000     | 47,170        | 71,070       | 118,240  | 0,042        |

[1b]= 0.2106 M

| t (min) | integral IS | integral 3'ba | integral 3ba | 3'ba+3ba | mmol product |
|---------|-------------|---------------|--------------|----------|--------------|
| -       | 113,4 ppm   | 62,5 ppm      | 62,6 ppm     | -        | -            |
| 1,500   | 100,000     | 0,470         | 1,080        | 1,550    | 0,001        |
| 3,000   | 100,000     | 1,510         | 2,680        | 4,190    | 0,001        |
| 4,500   | 100,000     | 2,580         | 3,730        | 6,310    | 0,002        |
| 6,000   | 100,000     | 3,610         | 5,050        | 8,660    | 0,003        |
| 7,500   | 100,000     | 4,220         | 6,310        | 10,530   | 0,004        |
| 9,000   | 100,000     | 5,280         | 7,660        | 12,940   | 0,005        |
| 10,500  | 100,000     | 6,070         | 9,140        | 15,210   | 0,005        |
| 12,000  | 100,000     | 7,210         | 10,000       | 17,210   | 0,006        |
| 13,500  | 100,000     | 7,880         | 11,740       | 19,620   | 0,007        |
| 15,000  | 100,000     | 8,410         | 12,690       | 21,100   | 0,007        |

## Supporting Information

|        |         |       |        |        |       |
|--------|---------|-------|--------|--------|-------|
| 16,500 | 100,000 | 9,630 | 14,270 | 23,900 | 0,008 |
|--------|---------|-------|--------|--------|-------|

[1b]= 0.0532 M

| t (min) | integral IS | integral 3'ba | integral 3ba | 3'ba+3ba | mmol product |
|---------|-------------|---------------|--------------|----------|--------------|
| -       | 113,4 ppm   | 62,5 ppm      | 62,6 ppm     | -        | -            |
| 1,500   | 100,000     | 2,01          | 3,19         | 5,200    | 0,002        |
| 3,000   | 100,000     | 4,07          | 6,12         | 10,190   | 0,004        |
| 4,500   | 100,000     | 6,32          | 9,79         | 16,110   | 0,006        |
| 6,000   | 100,000     | 8,56          | 13,19        | 21,750   | 0,008        |
| 7,500   | 100,000     | 11,36         | 17,34        | 28,700   | 0,010        |
| 9,000   | 100,000     | 13,96         | 21,7         | 35,660   | 0,013        |
| 10,500  | 100,000     | 17,17         | 26,4         | 43,570   | 0,015        |
| 12,000  | 100,000     | 20,93         | 32,22        | 53,150   | 0,019        |
| 13,500  | 100,000     | 28,750        | 42,190       | 70,940   | 0,025        |

## Supporting Information

### - Catalyst kinetic order data

[Cat]= 0.002706 M

| t (min) | integral IS | integral 3'ba | integral 3ba | 3'ba+3ba | mmol product |
|---------|-------------|---------------|--------------|----------|--------------|
| -       | 113,4 ppm   | 62,5 ppm      | 62,6 ppm     | -        | -            |
| 1,500   | 100,000     | 2,350         | 3,530        | 5,880    | 0,002        |
| 3,000   | 100,000     | 4,590         | 7,120        | 11,710   | 0,004        |
| 4,500   | 100,000     | 7,010         | 10,130       | 17,140   | 0,006        |
| 6,000   | 100,000     | 9,420         | 13,860       | 23,280   | 0,008        |
| 7,500   | 100,000     | 11,570        | 17,060       | 28,630   | 0,010        |
| 9,000   | 100,000     | 13,390        | 19,750       | 33,140   | 0,012        |
| 10,500  | 100,000     | 15,820        | 23,230       | 39,050   | 0,014        |
| 12,000  | 100,000     | 18,480        | 27,270       | 45,750   | 0,016        |
| 13,500  | 100,000     | 20,380        | 29,970       | 50,350   | 0,018        |
| 15,000  | 100,000     | 22,480        | 33,180       | 55,660   | 0,020        |
| 16,500  | 100,000     | 25,640        | 37,150       | 62,790   | 0,022        |
| 18,000  | 100,000     | 27,810        | 40,830       | 68,640   | 0,024        |
| 19,500  | 100,000     | 29,190        | 43,580       | 72,770   | 0,026        |
| 21,000  | 100,000     | 31,320        | 46,900       | 78,220   | 0,028        |
| 22,500  | 100,000     | 34,840        | 51,280       | 86,120   | 0,031        |
| 24,000  | 100,000     | 36,480        | 53,950       | 90,430   | 0,032        |
| 25,500  | 100,000     | 38,030        | 56,740       | 94,770   | 0,034        |
| 27,000  | 100,000     | 40,170        | 60,730       | 100,900  | 0,036        |
| 28,500  | 100,000     | 43,710        | 65,000       | 108,710  | 0,039        |
| 30,000  | 100,000     | 44,560        | 67,410       | 111,970  | 0,040        |
| 31,500  | 100,000     | 46,080        | 69,810       | 115,890  | 0,041        |
| 33,000  | 100,000     | 46,780        | 70,290       | 117,070  | 0,042        |
| 34,500  | 100,000     | 47,170        | 71,070       | 118,240  | 0,042        |

[Cat]= 0.0050236 M

| t (min) | integral IS | integral 3'ba | integral 3ba | 3'ba+3ba | mmol product |
|---------|-------------|---------------|--------------|----------|--------------|
| -       | 113,4 ppm   | 62,5 ppm      | 62,6 ppm     | -        | -            |
| 1,5     | 100,00      | 6,75          | 10,58        | 17,33    | 0,00615562   |
| 3       | 100,00      | 14,43         | 22,13        | 36,56    | 0,01298611   |
| 4,5     | 100,00      | 24,33         | 37,37        | 61,7     | 0,02191584   |
| 6       | 100,00      | 32,41         | 50,37        | 82,78    | 0,02940346   |
| 7,5     | 100,00      | 42,1          | 65,18        | 107,28   | 0,03810586   |
| 9       | 100,00      | 46,88         | 73,47        | 120,35   | 0,04274832   |

## Supporting Information

[Cat]= 0.001546 M

| t (min) | integral IS | integral 3'ba | integral 3ba | 3'ba+3ba | mmol product |
|---------|-------------|---------------|--------------|----------|--------------|
| -       | 113,4 ppm   | 62,5 ppm      | 62,6 ppm     | -        | -            |
| 1,5     | 100,00      | 0,77          | 1,09         | 1,86     | 0,00066067   |
| 3       | 100,00      | 1,74          | 2,94         | 4,68     | 0,00166234   |
| 4,5     | 100,00      | 2,8           | 4,34         | 7,14     | 0,00253613   |
| 6       | 100,00      | 3,54          | 5,43         | 8,97     | 0,00318614   |
| 7,5     | 100,00      | 4,28          | 6,31         | 10,59    | 0,00376157   |
| 9       | 100,00      | 4,79          | 7,22         | 12,01    | 0,00426595   |
| 10,5    | 100,00      | 5,33          | 7,91         | 13,24    | 0,00470285   |
| 12      | 100,00      | 5,89          | 8,83         | 14,72    | 0,00522854   |
| 13,5    | 100,00      | 6,37          | 9,46         | 15,83    | 0,00562282   |
| 15      | 100,00      | 6,62          | 9,76         | 16,38    | 0,00581818   |
| 16,5    | 100,00      | 7,2           | 10,44        | 17,64    | 0,00626573   |
| 18      | 100,00      | 7,45          | 10,88        | 18,33    | 0,00651082   |
| 19,5    | 100,00      | 7,83          | 11,47        | 19,3     | 0,00685536   |
| 21      | 100,00      | 8,08          | 11,96        | 20,04    | 0,00711821   |
| 22,5    | 100,00      | 8,54          | 12,22        | 20,76    | 0,00737395   |
| 24      | 100,00      | 8,71          | 12,56        | 21,27    | 0,0075551    |
| 25,5    | 100,00      | 9,02          | 13,05        | 22,07    | 0,00783926   |
| 27      | 100,00      | 9,3           | 13,57        | 22,87    | 0,00812342   |
| 28,5    | 100,00      | 9,54          | 13,87        | 23,41    | 0,00831523   |
| 30      | 100,00      | 9,74          | 14,24        | 23,98    | 0,0085177    |

## Supporting Information

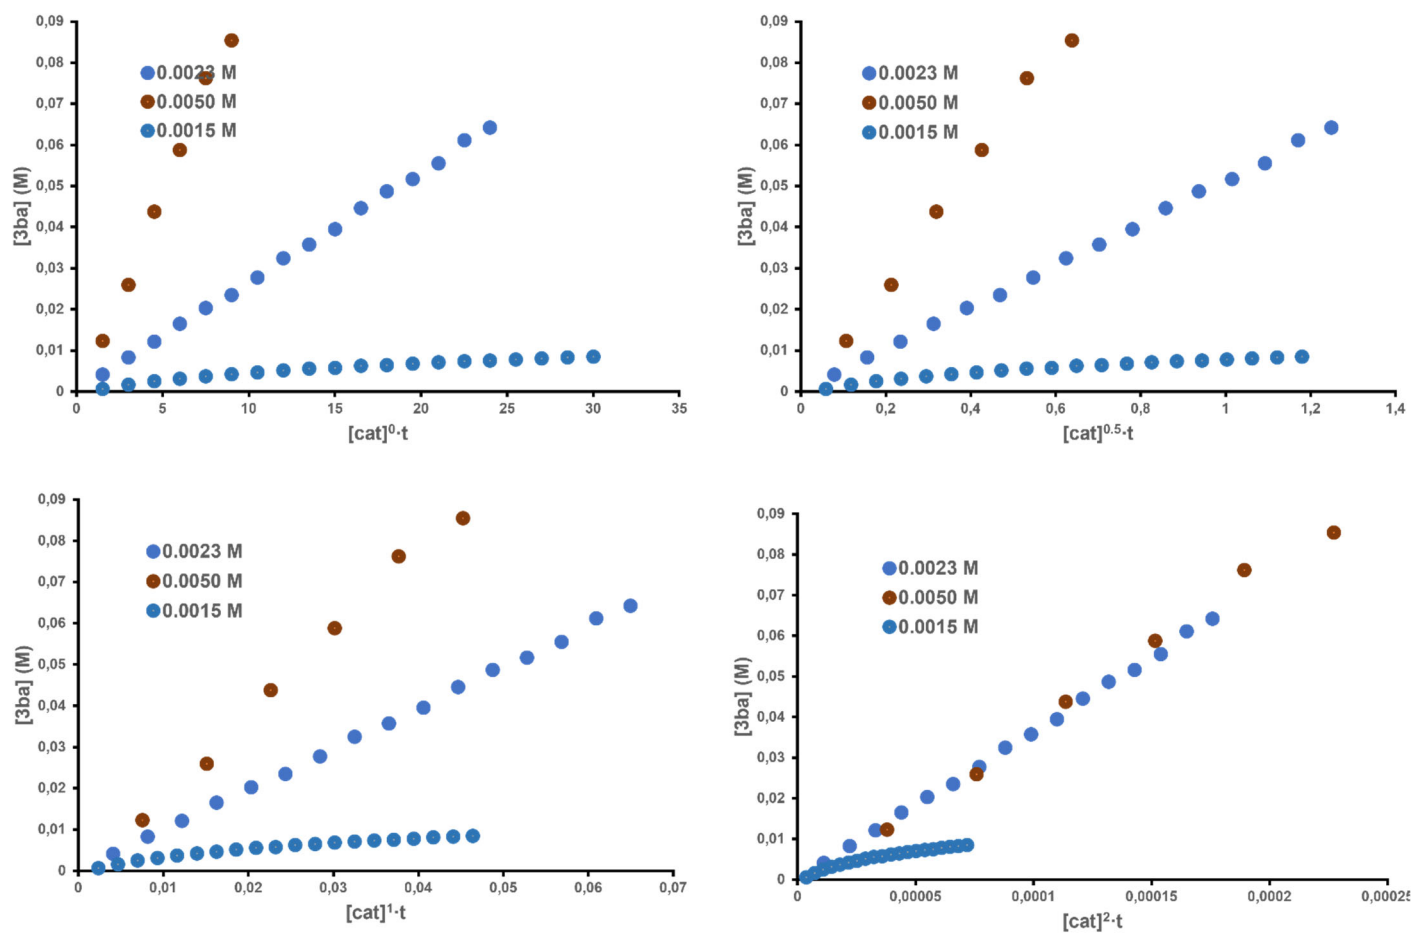

**Figure S133.** VTNA kinetic analysis to establish the catalyst kinetic data.

## Supporting Information

### SI-24. References

- <sup>1</sup> S. Zaleskiy, V. P. Ananikov, Pd<sub>2</sub>(dba)<sub>3</sub> as a Precursor of Soluble Metal Complexes and Nanoparticles: Determination of Palladium Active Species for Catalysis and Synthesis, *Organometallics*, 2012, **6**, 2302–2309.
- <sup>2</sup> A. Kingsbury, S. Brough, A. P. McCarthy, W. Lewis, S. Woodward, Conjugate Addition Routes to 2-Alkyl-2,3-dihydroquinolin-4(1H)-ones and 2-Alkyl-4-hydroxy-1,2-dihydroquinoline-3-carboxylates, *Eur. J. Inorg. Chem.*, 2020, 1011–1017.
- <sup>3</sup> A. Duursma, J.-G. Boiteau, L. Lefort, J. A. F. Boogers, A. H. M. de Vries, J. G. De Vries, A. J. Minnaard, B. L. Feringa, Highly Enantioselective Conjugate Additions of Potassium Organotrifluoroborates to Enones by Use of Monodentate Phosphoramidite Ligands, *J. Org. Chem.*, 2004, **23**, 8045–8052.
- <sup>4</sup> F. Bigi, S. Carloni, L. Ferrari, R. Maggi, A. Mazzacani, G. Sartori, Clean Synthesis in Water. Part 2: Uncatalysed Condensation Reaction of Meldrum's Acid and Aldehydes, *Tetrahedron Lett.*, 2001, **42**, 5203–5205.
- <sup>5</sup> M. Jardim, L. L. Baldassari, M. E. Contreira, A. V. Moro, D. S. Lüdtkke, Boron/Zinc Exchange for the Conjugate Arylation of Unsaturated Meldrum's Acid Derivatives, *Tetrahedron*, 2020, **76**, 130967.
- <sup>6</sup> M. L. Deb, P. J. Bhuyan, Uncatalysed Knoevenagel Condensation in Aqueous Medium at Room Temperature, *Tetrahedron Lett.*, 2005, **46**, 6453–6456.
- <sup>7</sup> T. K. Das, A. M. Rodriguez Treviño, S. Pandiri, S. Irvankoski, J. Siitonen, S. M. Rodriguez, M. Yousufuddin, L. Kürti, Catalyst-Free Transfer Hydrogenation of Activated Alkenes Exploiting Isopropanol as the Sole and Traceless Reductant, *Green Chem.*, 2023, **25**, 746–754.
- <sup>8</sup> A. R. Mohite, R. G. A. Bhat, Practical and Convenient Protocol for the Synthesis of (E)- $\alpha,\beta$ -Unsaturated Acids, *Org. Lett.*, 2013, **17**, 4564–4567.
- <sup>9</sup> S. Helmy, F. A. Leibfarth, S. Oh, J. E. Poelma, J. Hawker, J. Read de Alaniz, Photoswitching Using Visible Light: A New Class of Organic Photochromic Molecules, *J. Am. Chem. Soc.*, 2014, **23**, 8169–8172.
- <sup>10</sup> A. M. Dumas, E. Fillion, Sc(OTf)<sub>3</sub>-Catalyzed Conjugate Allylation of Alkylidene Meldrum's Acids, *Org. Lett.*, 2009, **9**, 1919–1922.
- <sup>11</sup> W. Hu, Z. Lin, C. Wang, Synthesis of Multisubstituted Allylic Alcohols via a Nickel-Catalyzed Cross-Electrophile Ring-Opening Reaction, *Org. Lett.*, 2022, **31**, 5751–5755.

## Supporting Information

<sup>12</sup> J. Zhang, W.-L. Yang, H. Zheng, Y. Wang, W. Deng, Regio- and Enantioselective  $\gamma$ -Allylic Alkylation of In Situ-Generated Free Dienolates via Scandium/Iridium Dual Catalysis, *Angew. Chem. Int. Ed.*, 2022, **61**, e202117079.

<sup>13</sup> a) Y. Kim, S. Sengupta and T. Sim, Natural and Synthetic Lactones Possessing Antitumor Activities, *Int. J. Mol. Sci.*, 2021, **22**, 1052. b) A. Janecka, A. Wyrębska, K. Gach, J. Fichna and T. Janecki, Natural and synthetic  $\alpha$ -methylenelactones and  $\alpha$ -methylenelactams with anticancer potential, *Drug. Discov. Today*, 2012, **17**, 561–572. c) T. Janecki, E. Błaszczuk, K. Studzian, A. Janecka, U. Krajewska and M Rózalski, Novel Synthesis, Cytotoxic Evaluation, and Structure–Activity Relationship Studies of a Series of  $\alpha$ -Alkylidene- $\gamma$ -lactones and Lactams, *J. Med. Chem.* 2005, **48**, 3516–3521. d) N. Bai, C. S. Lai, K. He, Z. Zhou, L. Zhang, Z. Quan, N. Zhu, Q. Y. Zheng, M. H. Pan and C. T. Ho, Sesquiterpene Lactones from *Inula britannica* and Their Cytotoxic and Apoptotic Effects on Human Cancer Cell Lines, *J. Nat. Prod.*, 2006, **69**, 531–535. e) M. Bruno, S. Rosselli, A. Maggio, R. A. Raccuglia, K. F. Bastow, C. C. Wu and K. H. Lee, Cytotoxic activity of some natural and synthetic sesquiterpene lactones, *Planta Med.*, 2005, **71**, 1176–1178.

<sup>14</sup> E. Lukowska, J. Plenkiewicz, Asymmetric Reduction of  $\alpha$ -Thiocyanatoketones by *Saccharomyces Cerevisiae* and *Mortierella Isabellina*—A New Route to Optically Active Thiiranes, *Tetrahedron: Asymmetry*, 2007, **18**, 1202–1209.

<sup>15</sup> K. Shimizu, M. Sakamoto, M. Hamada, T. Higashi, T. Sugai, M. Shoji, The Scope and Limitation of the Regio- and Enantioselective Hydrolysis of Aliphatic Epoxides Using *Bacillus Subtilis* Epoxide Hydrolase, and Exploration Toward Chirally Differentiated Tris(hydroxymethyl)methanol, *Tetrahedron: Asymmetry*, 2010, **21**, 2043–2049.

<sup>16</sup> R. Bellini, M. Magre, M. Biosca, P.-O. Norrby, O. Pàmies, M. Diéguez, C. Moberg, Conformational Preferences of a Tropos Biphenyl Phosphinooxazoline—a Ligand with Wide Substrate Scope, *ACS Catal.*, 2016, **6**, 1701–1712.
